# Supplementary material for: Reducing the Complexity of Complex Gene Coexpression Networks by Coupling Multiweighted Labeling with Topological Analysis
Source: Biomed Res Int. 2013 Oct 7;2013:676328. doi: 10.1155/2013/676328 (PMC3814072; doi:10.1155/2013/676328)
Supplement: Supplementary file 1 — Global citation summary.xlsx: This file integrates citation data for the three identified list of genes and correlates them with the related disease. These aggregated data enable to rank genes in a disease based on their citation count and to analyze the capability of our tool in selected genes that are highly cited in the literature with the related disease. Disease_citation_heapmap.xlsx: This file reports raw citation data obtained using ProteinQuest to understand if, given a disease, the set of genes selected by our algorithm is highly cocited with the disease while showing low citation count with the other diseases. Data reported in this file are therefore obtained by running the query available in Algorithm 5 of the paper for the identified list of genes for the three considered diseases. [file 676328.f1.zip]

Archive with 2 entries (2 files):
- disease_citation_heatmaps.xlsx
- global_citation_summary.xlsx
