# Supplementary material for: Reducing the Complexity of Complex Gene Coexpression Networks by Coupling Multiweighted Labeling with Topological Analysis
Source: Biomed Res Int. 2013 Oct 7;2013:676328. doi: 10.1155/2013/676328 (PMC3814072; doi:10.1155/2013/676328)
Supplement: Supplementary file 1 — Global citation summary.xlsx: This file integrates citation data for the three identified list of genes and correlates them with the related disease. These aggregated data enable to rank genes in a disease based on their citation count and to analyze the capability of our tool in selected genes that are highly cited in the literature with the related disease. Disease_citation_heapmap.xlsx: This file reports raw citation data obtained using ProteinQuest to understand if, given a disease, the set of genes selected by our algorithm is highly cocited with the disease while showing low citation count with the other diseases. Data reported in this file are therefore obtained by running the query available in Algorithm 5 of the paper for the identified list of genes for the three considered diseases. [file 676328.f1.zip › disease_citation_heatmaps.xlsx]

## Sheet: AML HEATMAP
	Co-Citation between genes and diseases
Filtered Genes for AML	AML	DLCL	BREAST
Total indentified papers	10691	4268	18280
CD34	3036	379	1101
FLT3	2248	18	33
RUNX1	2084	85	42
MLL	1289	71	46
CD33	1103	59	54
MPO	948	55	61
SPI1	760	71	6
KIT	753	58	162
CEBPA	627	12	50
JUN	471	288	1362
MYB	391	87	148
FUT4	381	198	80
BCR	380	621	28
RUNX2	371	2	164
CSF3R	323	13	11
HOXA9	310	3	27
MKL1	296	1	6
NFE2	269	1	1
MCL1	245	298	221
ABCC1	242	20	272
FLI1	227	7	22
ETV6	222	60	28
CASP9	204	232	686
IL8	198	129	551
PIK3CB	191	199	1230
GATA2	178	5	11
MAPK14	158	128	627
NCOR1	149	17	130
KRAS	146	39	434
MLLT10	124	2	0
SP100	120	12	6
KAT6A	117	0	0
HOXA10	115	3	20
SPN	95	289	31
CBL	94	59	54
FECH	92	77	19
CCNA1	70	1	30
SOD1	69	32	227
ABCC3	69	7	86
JUND	67	52	226
PTGER3	66	20	205
RARB	65	7	234
CBFA2T3	63	2	35
TOP1	60	11	101
CSF2RA	59	3	5
FGFR1	58	20	169
IFNB1	57	71	96
PICALM	56	12	1
NCOA2	55	3	117
CDK6	54	76	190
ETS2	53	7	111
YY1	52	17	64
MBP	49	26	85
NUMA1	48	1	36
CFLAR	47	59	94
HOXA7	47	3	2
HSF1	46	10	75
ERG	41	3	20
LMO2	40	56	10
EWSR1	40	13	20
WISP1	39	0	25
FES	39	4	98
TFAP2A	38	6	234
TEK	37	4	113
CD47	36	12	32
IL18	35	35	60
CASP2	35	25	53
BCRP2	34	13	0
KLF4	34	15	126
PLCG1	33	15	43
PTK2B	32	43	100
LAMP2	29	3	26
CUX1	29	0	37
CA2	28	0	26
CBS	28	2	8
SRGN	28	2	5
IKBKB	27	64	96
ANGPT1	27	2	58
CTSA	27	5	18
ZMYM2	27	5	5
BAD	26	44	73
CDK9	26	7	23
SATB1	26	2	62
HES1	25	14	72
FER	25	0	6
PTPRA	25	1	10
FOXO4	24	2	19
UBA7	24	0	0
SMPD1	24	12	45
TOP2B	24	11	27
HNRPDL	24	2	12
AFF1	24	3	2
PCBP2	23	9	53
SRF	23	7	34
CALCOCO2	22	1	2
NOS1	22	11	96
KAT6B	21	0	7
MBD2	21	1	53
RALGDS	21	13	15
HOXA5	21	1	52
TPMT	21	2	3
HFE	20	9	29
HDAC6	19	8	85
NT5C2	19	0	0
PLEK	19	16	57
CTNNA1	19	0	111
RPL22	19	34	5
RNASE2	19	0	10
ARID4A	18	8	35
EPS15	17	2	9
CASP6	17	10	79
PRKAR2A	17	6	50
PURA	17	1	11
TBXAS1	17	0	7
AKT2	17	19	180
PLD2	16	0	59
MZF1	16	1	5
HOXB3	16	1	5
USF2	15	2	41
ELF1	15	11	31
HHEX	15	0	16
GAB1	15	10	44
MGEA5	14	7	60
SF3B1	14	1	7
TRIM24	14	0	24
SMARCA2	14	7	45
FCGR2B	14	207	24
PDGFA	14	0	40
MAP2K3	14	8	40
KDM6A	14	3	5
HNRNPA1	13	4	30
RPS14	13	0	19
TRAPPC4	13	1	5
COX6B1	13	9	45
PBX3	13	0	0
ICOSLG	13	6	55
DYRK1A	12	0	6
HNRNPK	12	2	31
SMC3	12	1	8
PIK3R1	11	15	38
TNK2	11	0	33
SMO	11	14	64
LYL1	10	6	0
GAS7	10	0	2
C19ORF6	10	0	0
PGF	10	8	69
HLX	10	0	1
FOSB	10	3	28
GNAQ	10	0	4
TSC2	10	7	87
DICER1	10	17	53
PRDX4	10	1	9
F12	10	8	6
ATRX	9	1	23
DUSP6	9	0	33
CTBP1	9	6	46
ITGA9	9	3	34
ZYX	9	1	23
RALBP1	9	2	4
PGD	9	0	15
PKNOX1	9	5	1
HNRNPU	9	3	7
IL5RA	9	0	2
USP7	9	3	7
SOX4	9	3	39
KHDRBS1	9	1	49
IL22	8	2	9
SMARCC1	8	0	11
CABIN1	8	8	6
SLC39A1	8	0	8
MAP2K7	8	6	16
ZNF44	8	0	5
MT1G	8	1	8
GTF2F1	8	0	2
TPSAB1	8	0	2
KIDINS220	8	4	28
VASP	8	1	48
TSHB	8	6	66
TRIM39-RPP21	8	0	0
SRRM1	8	9	1
SRY	8	2	48
NR6A1	8	2	5
N4BP1	8	1	0
MEF2A	7	2	2
MAN2C1	7	3	2
PLD1	7	1	40
KRT10	7	0	12
SAP130	7	0	0
CXCL2	7	8	53
UBTF	7	1	27
PARK7	7	1	10
PCM1	7	2	3
TLE4	7	4	4
CCL23	7	6	6
BUB1	7	7	50
PVR	7	5	10
SMAD1	7	16	63
MCAM	7	1	60
ACIN1	7	2	5
SFPQ	6	8	22
MAPKAPK2	6	9	24
PEG10	6	8	16
ARHGDIA	6	2	58
PAX3	6	2	8
PTGER2	6	2	32
NCSTN	6	2	61
MNT	6	5	37
NR1H2	6	2	65
APTX	6	1	4
MAP3K11	6	1	30
RBX1	6	8	26
PPIA	6	11	72
NUCB2	6	0	2
MDM4	6	18	62
RCHY1	6	0	5
H3F3B	6	0	0
APBB1IP	6	0	0
RNH1	6	0	7
LGALS9	6	10	16
CCNT1	6	1	10
ACTR2	6	1	10
FLOT1	6	1	10
CENPJ	6	0	12
SARS2	5	0	0
EIF4A1	5	0	4
EHMT2	5	1	11
PRDM2	5	9	27
PLAGL1	5	2	32
HAX1	5	8	13
FRK	5	8	24
TPSG1	5	1	2
ATXN3	5	1	1
GNAS	5	0	38
EEF2	5	2	30
KDM2A	5	1	0
NIPBL	5	6	5
TAF1	5	5	30
IGF2R	5	1	85
CHD4	5	0	6
CREB3	5	0	3
CHMP5	5	0	0
NOTCH2	5	17	42
SPEN	5	1	2
SPR	5	0	0
PPP1R12A	5	0	9
PKM	5	1	56
NTF3	4	2	12
ATF7IP	4	0	0
SERPINB1	4	0	5
PTP4A2	4	0	15
GNA15	4	0	0
RAB9A	4	0	1
ATF6	4	13	16
ID3	4	6	13
TACSTD2	4	5	24
RNF7	4	1	1
EIF3A	4	3	22
KLHL24	4	2	2
NLRP3	4	2	18
RPA3	4	0	2
LRRC16A	4	2	34
TADA2A	4	0	1
HADHA	4	1	12
SCN10A	4	1	15
DDX3X	4	5	18
DDX41	4	1	2
DHDDS	4	10	16
TBL1X	4	14	21
EIF2B3	4	1	0
SUCLG1	4	1	14
RHEB	4	8	29
ITPR3	4	4	5
ITPR2	4	5	3
THRB	4	2	28
DDX39B	4	0	8
FRAS1	4	4	1
EIF4G2	4	0	3
ELF2	3	0	7
DGUOK	3	1	3
RNF19A	3	1	15
MANBA	3	1	0
STAB1	3	1	12
TDRKH	3	0	0
PHACTR1	3	1	4
CAT	3	1	10
IL1RL1	3	5	9
MAML1	3	3	11
ZBTB24	3	0	0
ZFP36L2	3	1	4
BRE	3	0	20
TGOLN2	3	0	5
GTF2H3	3	0	4
CIAO1	3	3	0
TCEB2	3	1	3
BTRC	3	2	19
CPA3	3	0	1
FOSL2	3	3	36
RPS3A	3	1	4
KDM5A	3	0	11
M6PR	3	4	12
SF1	3	0	2
TLX3	3	1	1
HOXD9	3	0	1
NAPA	3	1	35
LLGL1	3	0	2
HLCS	3	0	5
NRL	3	0	43
GRN	3	0	78
RASGRP2	3	0	2
LARS	3	13	15
MSH6	3	22	94
OGT	2	4	18
DUSP10	2	0	3
PDX1	2	4	11
NR4A2	2	3	8
FKBP8	2	1	1
PRPF8	2	0	2
HNRNPA3	2	0	5
PDPK1	2	4	23
JARID2	2	6	4
MBOAT7	2	0	1
NINL	2	10	17
SLC25A28	2	0	0
FIS1	2	3	2
CARD9	2	10	0
MTM1	2	2	5
PIKFYVE	2	3	7
PELO	2	0	3
EEA1	2	9	35
GLIPR1	2	1	6
SOS2	2	5	8
TBC1D3	2	0	1
CAPN1	2	2	25
MAU2	2	2	14
EIF5	2	0	0
CRADD	2	1	3
ST7L	2	0	0
TOPORS	2	0	7
RRAS2	2	3	24
DEC1	2	1	30
TSPAN32	2	0	1
KDM3B	2	0	2
SMC5	2	0	1
IPPK	2	0	0
CFD	2	2	26
EFNA5	2	2	13
LAMB3	2	1	7
PTPN12	2	5	9
CDR2	2	22	32
ANKRD28	2	0	0
RB1CC1	2	0	59
SRRM2	2	2	1
LYST	2	1	0
RNF17	2	0	0
REEP5	2	3	9
RHOT2	2	1	0
ATG16L1	2	0	4
GUK1	2	24	7
TLN1	2	1	5
GSTO1	2	2	12
PSTPIP2	2	0	6
COA1	2	0	0
ITSN2	1	2	10
SART1	1	0	9
MAP3K9	1	0	0
PTBP3	1	0	0
PATZ1	1	2	7
NPC1	1	1	3
ROR1	1	9	11
ARIH1	1	0	0
ARG2	1	1	4
SRSF5	1	3	8
COL14A1	1	2	5
SRSF7	1	1	4
SRSF6	1	0	6
OPRM1	1	5	28
ZNF148	1	0	2
IL1RAP	1	1	1
ANP32A	1	5	7
ELMO1	1	0	4
THOC2	1	1	4
SCAF11	1	2	9
BRD3	1	1	0
HNRNPUL2	1	0	1
RBM15B	1	0	0
PASK	1	0	0
NDUFAB1	1	0	1
IDS	1	0	2
ARRB1	1	0	52
TFEC	1	1	2
ATP7A	1	2	17
P2RX4	1	0	0
P2RX1	1	0	0
P2RX2	1	0	1
MAZ	1	11	16
PPP2R1B	1	0	7
ARL1	1	0	0
PKN2	1	1	1
TXNRD2	1	1	23
NFATC4	1	2	13
NFATC3	1	9	7
XPNPEP1	1	0	3
WNK1	1	0	0
LHX3	1	0	8
HIP1	1	6	11
RNF2	1	1	3
GNB2L1	1	6	30
PPARD	1	3	23
ZEB2	1	3	94
ATP5L	1	0	2
AGPAT2	1	0	2
CD164	1	2	46
FKBP15	1	1	11
CETN1	1	0	5
AZU1	1	0	6
ATXN2L	1	0	0
BCL9	1	10	1
NPR3	1	0	0
SCLY	1	0	4
TRIM32	1	0	3
DIAPH1	1	1	16
DIAPH3	1	0	3
HEG1	1	0	1
EIF3L	1	0	1
UBAP2L	1	0	1
TP53I11	1	1	0
EIF4B	1	0	6
UBE2E1	1	1	2
COPA	1	2	8
CD97	1	0	2
LAIR1	1	2	0
COX4I1	1	1	14
SAFB	1	6	78
UBE4B	1	0	0
TUBGCP2	1	0	0
ZC3H11A	1	0	0
CSN3	1	1	14
XRCC2	1	3	53
NAA15	1	9	9
INTS8	1	0	0
MAP2K5	1	0	17
MYO18A	1	0	0
RPS21	1	0	0
PTH2R	1	0	1
MAGEB4	1	0	3
TLL2	1	0	0
ZNF292	1	0	0
NAP1L1	1	0	6
CREG1	1	2	1
SYMPK	1	0	1
ARHGEF5	1	1	8
RPL35	1	0	0
GNG11	1	1	1
ZNF32	1	0	1
PER1	1	0	23
MT1F	1	0	13
RBM5	1	1	7
TNFSF12	1	9	9
IQGAP1	1	0	47
ANK3	1	1	4
SPTLC2	1	1	4
ADAM21	1	0	0
HNRNPH1	1	1	7
PEX2	1	0	1
ARID5B	1	0	1
NCOA4	1	0	36
CHD1L	1	0	0
INPP5B	1	0	1
SH3BGRL3	1	0	0
GGA3	1	0	7
TAF7L	1	0	1
H2AFY	1	0	9
POLG	1	2	12
SRP72	1	1	1
ADD1	1	1	0
KIAA0146	1	0	0
GAD2	1	2	7
PBRM1	1	0	15
CBR3	1	0	9
PSEN1	1	1	10
GTF2I	1	1	8
POLR2F	1	0	4
GNPTAB	1	0	0
ILF3	1	0	13
POLR3B	1	0	5
MAPK13	1	2	5
PSMD10	1	0	2
HOXC5	1	5	2
RBM10	1	0	5
PSMA2	1	0	2
MAP4K5	1	0	8
PI4K2A	1	0	2
GML	1	12	2
ZMYM4	1	0	1
ZMYM5	1	0	0
TACR3	1	0	0
PAK2	1	2	33
TPP1	1	1	2
TM9SF4	1	0	0
KIAA0100	1	0	1
HIPK3	1	1	1
SCARF1	1	1	0
ADNP2	1	0	0
ANXA11	1	0	4
PLGRKT	1	1	14

## Sheet: DLCL HEATMAP
	Co-Citation between genes and diseases
Filtered Genes for AML	AML	DLCL	BREAST
	1690	5753	4453
MS4A1	164	3493	124
CD19	494	1436	87
CD40	77	662	102
CD79A	58	506	10
CD22	68	460	10
IL10	98	429	331
CR2	37	390	12
BIRC3	26	352	134
PAX5	37	351	34
CD80	142	218	135
CD27	21	139	23
PARP1	152	122	721
AICDA	0	120	1
RB1	113	112	759
TCL1A	18	107	16
CXCR5	4	94	9
CD79B	5	89	2
CXCL13	2	84	56
RELB	18	76	89
BLNK	7	73	6
GRB2	69	64	293
SYK	11	62	55
NFATC1	12	56	34
MMP9	125	48	1347
CD70	3	43	8
CD72	2	41	1
POU2AF1	5	40	0
ENTPD1	1	37	2
TCF3	40	36	15
IRF8	65	36	3
CXCL9	46	34	58
BCL11A	16	33	2
TERT	51	31	219
BACH2	12	29	1
CCL19	6	24	19
ETS1	82	23	149
SPIB	4	22	1
PLCG2	4	21	1
IL21R	0	21	2
UBC	29	17	167
HLA-DQA1	6	14	8
HLA-DQB1	8	12	11
RFX5	0	12	2
UBE2N	2	12	14
LTBR	14	11	11
VPREB3	0	11	0
APP	18	10	48
KCND1	0	10	2
IGHM	0	9	1
CSNK1A1	0	9	16
SMARCB1	15	9	26
RASGRP3	2	9	2
TCL1B	1	8	5
RGS13	0	8	0
IKZF3	3	7	5
LRMP	1	7	0
CD1C	6	7	6
BATF	0	7	4
HRK	1	7	5
WEE1	8	7	30
TFEB	1	7	0
ITGA6	25	7	210
HLA-DMA	30	7	86
GALNS	18	6	36
SWAP70	0	5	2
BIK	0	5	11
NQO2	1	5	28
BLK	0	5	1
TMPO	2	5	15
PIAS2	4	4	9
UBE2D2	3	4	18
SH2B2	0	4	0
ENPP2	1	3	52
FKBP1A	14	3	33
CCL18	7	3	16
SIT1	0	3	1
NR1H3	1	2	17
TRIO	0	2	4
MMP12	0	2	45
CTNNBIP1	4	2	21
SLC15A3	0	2	0
GRIK2	0	2	1
MLL4	1	2	4
TFE3	3	2	3
RNF11	0	2	22
E2F5	3	2	22
HLA-DMB	1	2	1
CXCR6	0	2	17
UBD	5	2	3
TPMT	21	2	3
ADAMDEC1	0	2	0
RXRA	57	1	54
DCAF7	1	1	7
HLA-DOA	0	1	2
OSBPL2	0	1	1
NPL	1	1	4
CETP	2	1	1
CTBP2	0	1	15
GRHPR	1	1	0
LRPAP1	4	1	39
SERPINB6	0	1	1
HTR3A	2	1	48
AFF3	2	1	1
ME3	2	1	5
CNR2	2	1	4
CYB5R2	0	1	0
SGPP1	0	1	1
PKN2	1	1	1
MCM5	3	1	7
CTSH	0	1	9
TCF7L2	3	1	38
ZNF804A	0	1	0
NF1	35	1	26
SH3BP5	0	1	1
TMEM243	0	1	0

## Sheet: BC HEATMAP
	Co-Citation between genes and diseases
Filtered Genes for AML	AML	DLCL	BREAST
	5779	2644	41517
ERBB2	40	46	19718
BRCA1	19	6	8178
PGR	4	6	6761
IGF1	108	73	2726
CDH1	42	22	2595
ESR1	8	5	2350
MUC1	21	122	2262
PRKACG	389	287	1948
MAPK1	393	229	1643
FN1	288	125	1223
ESR2	4	3	1188
MMP2	64	72	1176
ERBB3	0	1	1128
MTOR	189	165	961
AR	43	12	957
IGF1R	33	11	896
TNFSF10	232	161	734
CASP9	204	232	686
CXCL12	139	102	676
RARA	1916	22	556
TGFA	20	10	546
MAP2K1	109	69	481
SPP1	24	21	461
CYP1B1	2	3	440
FANCC	67	3	426
EPCAM	4	18	426
KRT14	2	5	383
PRLR	3	0	363
FGFR2	8	2	351
WNT1	4	2	335
PIP	0	0	318
CYP2D6	10	0	312
SMAD3	35	36	308
ELF3	9	1	268
GATA3	24	17	259
NOS2	48	63	248
INSR	35	26	241
TFAP2A	38	6	234
CTSB	17	22	223
MMP3	6	8	221
ADIPOQ	7	3	210
MMP13	13	0	206
PTGER3	66	20	205
MMP11	0	0	198
SCGB2A2	0	0	190
NCAM1	469	288	186
APOD	0	0	176
ODC1	60	10	175
PRKCA	88	16	160
GRB7	1	1	159
GRP	6	2	159
PDGFRB	69	15	156
SKP2	18	36	155
VWF	83	25	143
DBT	4	0	134
VCAM1	75	77	132
KRT7	2	4	128
ADRA1A	18	47	125
ST14	3	1	125
SPDEF	0	0	120
TIMP3	6	7	118
LTF	78	10	111
SPARC	5	4	105
VCAN	4	5	102
HNMT	11	1	100
CXCL10	39	92	95
NRIP1	4	1	94
HMGA2	15	7	87
ERCC2	24	7	86
ABCC3	69	7	86
F11R	7	2	85
SMAD7	13	16	84
UGCG	9	2	82
NAT1	5	3	80
TOX3	0	0	79
DCN	8	2	79
PTCH1	4	8	76
RPS6KA3	17	7	76
ADAM12	0	0	76
IGFBP7	26	7	74
TFF3	0	2	72
POSTN	3	5	72
CTSK	1	6	69
C3	38	86	67
CDH11	1	0	65
APAF1	57	54	65
SDHB	7	4	64
CYP2B6	4	0	62
HSPA1A	10	24	61
CLDN4	0	1	60
EGR3	7	9	60
OGG1	9	3	59
CDC25B	9	10	57
THRA	48	4	57
EXOG	13	9	56
GGPS1	54	5	56
MAPT	3	1	56
DACH1	1	4	56
NRP2	2	1	55
TBX3	1	0	55
CRABP2	11	1	55
SLC39A6	1	1	54
SPHK2	2	4	54
SPINT1	0	0	51
APOE	6	5	51
UBR5	0	0	51
PGK1	8	7	49
CD46	13	30	48
TAGLN	5	5	47
RHOB	11	1	46
IL6ST	39	40	45
RAD52	2	1	45
SERPINA3	9	7	44
SSTR1	2	3	43
SULF1	2	0	43
EFNA1	0	0	43
NRL	3	0	43
CXCL11	3	6	42
CNKSR1	4	0	42
COL1A2	3	5	42
RUNX1	2084	85	42
TGFB3	1	1	41
AGR2	0	0	41
AGTR1	4	2	40
PLD1	7	1	40
FAP	0	1	40
PER2	8	2	40
KDM5B	3	2	39
SOX4	9	3	39
EGLN2	1	0	38
WWP1	0	3	38
LRIG1	2	1	38
LGALS3BP	0	2	38
CLDN3	0	0	37
SLC16A1	0	6	37
KSR1	12	2	36
FABP7	1	1	36
PTER	15	14	36
COL3A1	0	3	36
SREBF1	2	2	36
NUMA1	48	1	36
RUNX1T1	1218	41	36
FBLN1	0	0	35
HNF1A	11	13	35
NAPA	3	1	35
UPP1	0	0	34
SLC5A7	20	13	34
GPNMB	0	0	33
MTAP	10	4	33
SREBF2	6	4	33
CCNG2	2	1	33
STC2	0	0	33
LUM	0	2	33
SERPINF1	0	1	32
TRIM25	1	0	32
MMP26	0	0	31
PTGER1	6	1	31
BCL3	14	119	30
PPP5C	0	1	30
PRKD1	2	6	29
TRPS1	3	0	29
PTPN22	2	2	29
OPRM1	1	5	28
PPT1	0	0	28
SLC4A7	0	0	28
TPD52	0	1	27
FANCF	21	0	26
GHRHR	0	0	26
NF1	35	1	26
CALCR	1	0	26
LRBA	0	1	25
SEMA3F	0	0	25
TOB1	0	1	25
ARHGAP1	0	1	25
ARF1	4	0	24
ELF5	0	0	24
MAPKAPK2	6	9	24
TACSTD2	4	5	24
LPP	4	10	24
PPARD	1	3	23
IRF6	0	0	23
EDNRA	1	0	23
HOXC6	6	8	23
CA12	0	0	23
INHA	7	1	23
AGTR2	3	1	22
PRKCE	13	2	22
DHPS	13	4	22
THBS2	1	1	22
AZGP1	0	0	21
CXCL14	1	0	21
COL1A1	3	2	21
SPINT2	3	1	20
NOX4	2	1	20
RAB25	0	0	20
FANCE	3	2	20
FXYD3	0	3	20
HINFP	6	2	20
SMOX	1	1	20
KDM4B	0	0	20
CFB	5	13	20
NUPR1	1	2	20
EFS	7	2	19
RPS14	13	0	19
FBN1	0	0	19
AMFR	2	0	18
TNN	0	0	18
RCVRN	1	1	18
PRDX3	28	0	18
RAD51D	0	0	18
MAPK11	2	5	18
PPP2R5D	1	0	17
NR2C1	9	0	17
SCNN1A	2	1	17
MRPS30	1	3	17
BMPR1B	0	0	17
MAP2K5	1	0	17
MAGED2	0	0	17
ACTA2	2	0	17
TACR1	6	0	17
LRP2	3	1	16
PRSS8	0	0	16
GLI3	7	18	16
BHLHE40	1	1	16
A2M	3	0	16
VTCN1	1	5	16
SPAG9	1	47	16
MTNR1A	0	0	16
ENPP1	1	8	16
TPH1	3	0	16
PBX1	60	30	16
GLUL	0	5	15
BHLHE41	0	0	15
TFAP2B	0	0	15
CERS2	0	0	15
NDUFAF4	0	0	15
CTBP2	0	1	15
VAV3	0	0	15
GALNT6	0	0	15
PTPN9	11	0	15
ELSPBP1	0	1	14
SCGB1D2	0	0	14
AMD1	1	6	14
PDGFD	0	0	14
CDH4	0	0	14
NF2	1	0	14
SUCLG1	4	1	14
SLC25A3	2	0	14
PLVAP	4	4	14
BST2	6	5	13
MGP	3	0	13
TBXA2R	23	1	13
FABP4	3	0	13
NFATC4	1	2	13
KRT15	0	0	13
BGN	1	1	13
COLEC10	9	9	13
RARRES1	2	0	13
GP2	2	1	13
SERPING1	4	12	12
DUSP4	15	0	12
NMT1	0	0	12
MBD3	6	0	12
NKX3-1	0	0	12
RXRB	1	0	12
IRX5	0	1	12
SPG7	2	1	12
FZD1	0	1	12
LSR	1	1	12
MED23	3	1	11
KIAA1109	1	1	11
GAS1	2	0	11
PDX1	2	4	11
FBLN2	0	0	11
MXD1	3	7	11
NUDT1	4	0	11
RARRES3	7	4	11
SFRP4	7	0	11
CYB5A	1	1	11
SCUBE2	0	0	11
DARC	4	0	11
WNT2B	0	2	11
VWA5A	0	0	10
LRRC15	0	0	10
FMO2	2	0	10
WNT7A	1	0	10
BAIAP2	0	0	10
NEU3	2	0	10
HRH4	0	0	10
FDX1	0	0	10
COMP	3	23	10
PVRL1	3	0	10
SRPK1	1	0	10
KDM5D	12	10	10
GALNT3	1	0	10
AQP1	13	0	10
ITSN1	0	0	9
C1QA	0	5	9
PIAS2	4	4	9
IFI27	1	2	9
ZFP36L1	4	4	9
SLCO4A1	0	0	9
RPL10	2	0	9
EXTL3	0	0	9
TRIM29	0	0	8
EIF4EBP2	2	0	8
PAX3	6	2	8
IAPP	0	0	8
ACD	1	0	8
FADS1	0	0	8
TNFAIP6	0	1	8
KCNA1	0	1	8
COL11A1	0	0	8
SH3YL1	5	0	7
PATZ1	1	2	7
IGKC	0	6	7
PGAP3	0	0	7
ST6GALNAC2	0	0	7
INHBA	51	0	7
GCK	2	3	7
CHIA	0	1	7
HAP1	0	0	7
KAT6B	21	0	7
RAB31	7	0	7
ITCH	3	6	7
PRR5	0	0	7
IGHA1	1	13	7
NPHP4	0	0	7
ZKSCAN3	0	0	7
RNH1	6	0	7
PRDM16	47	3	7
GGA3	1	0	7
ADCY1	3	3	7
POLI	0	8	7
DIO3	1	0	7
C4A	0	0	6
PSAT1	0	0	6
CERS4	0	0	6
HRH3	0	0	6
HIF3A	1	0	6
CST8	5	1	6
AKAP1	4	1	6
ADCYAP1R1	0	1	6
PIK3R3	0	0	6
INTS6	0	5	6
MAP7	0	0	6
KCNH6	9	2	6
ZNF24	6	0	6
FBP1	3	0	6
CPB1	0	0	6
LGALS8	0	0	6
PRUNE	0	0	6
THBS3	0	3	6
MYOF	0	0	6
ALPPL2	0	1	5
COL14A1	1	2	5
ABCA3	14	3	5
GABRP	0	0	5
DNAJA2	1	0	5
ACOT8	0	1	5
COL10A1	0	0	5
EPHB3	0	0	5
EPHA3	1	0	5
DLX6	0	1	5
ARSB	1	1	5
ATP5B	1	0	5
DST	0	0	5
ARHGAP32	0	0	5
TCP1	1	1	5
TMBIM6	2	8	5
SELENBP1	0	1	5
CDC42EP3	2	0	5
TMPRSS3	0	0	5
ASPN	0	0	5
RASGRF1	0	0	5
ANO1	0	0	5
RPRM	0	0	5
CPSF4	0	0	5
ADAMTS13	0	2	5
COL4A1	1	2	5
EFNB1	0	0	5
SMAD9	0	2	5
EPYC	0	0	5
NASP	0	0	5
ITPR3	4	4	5
TJP3	0	0	5
TLR5	1	8	5
HOXD3	15	1	5
NR6A1	8	2	5
ECHDC1	1	0	5
SETMAR	8	0	5
PIGT	0	0	5
PSME3	0	1	5
SP4	0	0	5
VPS52	3	1	4
MARK2	3	4	4
RGS6	0	0	4
PLXDC1	0	0	4
LRRC32	9	0	4
EXOC3	0	0	4
IFT122	3	0	4
EDA	0	0	4
CERS6	0	0	4
CLDN8	0	0	4
TBCD	0	0	4
CA1	17	1	4
HUS1	0	0	4
RYBP	0	1	4
GJA4	1	0	4
NENF	0	0	4
BRS3	0	0	4
GOLGB1	0	0	4
SCLY	1	0	4
CST1	0	0	4
DPT	0	0	4
HMG20B	0	0	4
MAGEB1	0	0	4
IGLC2	1	7	4
DHODH	1	2	4
ULBP1	12	3	4
GGT5	1	0	4
IL20RA	0	0	4
ELK4	2	0	4
PLCB2	5	0	4
MSH4	0	0	4
MLNR	0	0	4
LDHC	1	2	3
GRIN2B	0	1	3
NLE1	1	0	3
GPLD1	3	0	3
IL13RA1	3	5	3
C1GALT1	0	1	3
ADORA2B	1	0	3
ADRA2A	6	0	3
CYP3A43	0	0	3
HOXC10	2	1	3
COL5A2	0	0	3
XPNPEP1	1	0	3
EPHA5	1	0	3
GRK5	0	5	3
CEP250	0	1	3
SEMA3G	0	0	3
SEPP1	0	2	3
PLIN1	0	0	3
CST4	0	0	3
PEAK1	0	1	3
ITGB6	0	0	3
AKAP9	0	0	3
STRN	0	0	3
NAGLU	0	0	3
SLC23A2	0	0	3
STX2	6	15	3
COL6A1	0	2	3
SLC7A8	0	0	3
CPA2	0	0	3
ACOX3	0	0	3
IPO8	0	0	3
TSPAN13	0	0	3
RCAN1	3	1	3
H2AFJ	0	0	3
ALOX15B	0	0	3
HS3ST3B1	0	0	3
IGF2BP3	1	8	3
LAMA4	0	1	3
DNAJC12	0	0	3
RRBP1	0	0	3
FGF16	0	0	3
NVL	0	0	3
NYX	1	0	3
UST	0	0	3
HOXB2	10	1	3
CPNE3	0	0	3
CTSZ	0	0	3
ARFGEF2	0	0	2
RGS5	4	2	2
TCOF1	0	0	2
ZNF148	1	0	2
RAP2B	2	2	2
PARVB	0	0	2
SF3B3	0	0	2
FOXE3	0	1	2
EDF1	0	0	2
RAB7A	0	0	2
P2RY4	3	0	2
P2RY1	3	0	2
ACSF2	0	0	2
AHNAK	1	1	2
MAML3	0	0	2
CELSR1	1	0	2
ATP2A2	2	4	2
RABEP1	1	1	2
TTLL5	0	0	2
ATP4A	0	18	2
MORC2	0	0	2
SENP3	2	0	2
GJC1	1	0	2
TSTA3	0	0	2
RAB2A	2	0	2
RRP12	0	0	2
BLVRA	1	1	2
COG2	0	0	2
NEBL	2	0	2
CST5	0	0	2
AGFG2	8	0	2
YIPF1	1	0	2
AEBP1	0	0	2
GM2A	0	0	2
ARHGAP19	0	0	2
NUP188	0	0	2
YARS	1	1	2
ACADSB	0	0	2
RPS28	0	0	2
RLBP1	0	0	2
PPFIBP2	0	0	2
DEPTOR	1	0	2
MARCKSL1	0	0	2
NAB1	1	0	2
CYBRD1	2	1	2
CER1	0	1	2
RPL28	2	0	2
ATP6AP1	0	0	2
CNOT4	0	0	2
IGHMBP2	4	1	2
PDE4D	0	0	2
TROVE2	0	1	2
SHANK2	0	0	2
CACNA1D	0	1	2
ZFX	0	1	2
IPO5	0	0	2
EFNB3	0	2	2
PDGFRL	0	0	2
SLC2A10	0	0	2
HOXA11	8	0	2
IGF2BP2	0	1	2
PLAG1	8	0	2
TREX2	0	0	2
ARFIP1	0	0	2
MYO6	0	0	2
IQCK	0	0	2
FGF22	0	0	2
GNS	1	0	2
HOXA4	10	1	2
MAFB	9	9	2
GPATCH2	0	0	2
TTC39A	0	0	2
TBPL1	1	0	1
PDPR	0	0	1
EXD3	0	0	1
SCYL3	0	0	1
LPCAT4	0	0	1
MC2R	0	0	1
GOLPH3L	0	0	1
GUCY2F	0	0	1
INSRR	0	0	1
EIF1B	0	0	1
CACFD1	0	0	1
FMOD	8	0	1
DUSP7	3	1	1
KIAA1324	0	0	1
GALR1	0	0	1
DNAJC7	1	0	1
FBXO21	0	0	1
ZNF8	0	0	1
MEAF6	0	0	1
IFITM3	0	0	1
TTC3	0	0	1
AUTS2	0	0	1
HIST1H4J	1	0	1
CYB561	0	1	1
CLSTN2	0	0	1
PAX4	0	2	1
RNF103	0	0	1
SLC1A7	0	0	1
PRR5-ARHGAP8	0	0	1
GAA	3	0	1
TMC5	0	0	1
COL5A1	0	1	1
MED31	0	0	1
SLC35A2	2	0	1
VPS13C	0	0	1
NEK9	0	0	1
HPCAL1	2	0	1
LAMTOR2	0	1	1
EFHD1	0	0	1
AP2B1	0	0	1
GPX5	0	1	1
RAB6B	0	0	1
CHST15	0	0	1
RBBP6	0	0	1
ATG13	0	0	1
ARR3	0	0	1
ALDH1L1	0	2	1
CRYGA	0	2	1
PLXNB2	0	2	1
PRKAB2	1	0	1
MVD	0	0	1
BLK	0	5	1
KATNB1	0	0	1
ALX3	0	0	1
PPAP2C	0	0	1
FAM134C	0	0	1
C1R	0	0	1
DNAH2	0	0	1
GPR3	0	0	1
L3MBTL1	10	0	1
SIRT6	0	0	1
RPAP1	0	0	1
HOXD12	1	0	1
ADAMTS8	0	0	1
IFNA7	0	3	1
AVPR1A	0	0	1
ASIP	0	1	1
GLRA1	0	0	1
PDE11A	0	0	1
ZNF14	0	0	1
ADCK2	0	0	1
SYNJ2	0	0	1
GUCY1A3	0	0	1
EXOSC9	0	0	1
CLMN	0	0	1
REPS2	0	0	1
CRISPLD2	0	0	1
CCNB1IP1	0	0	1
HIST1H2BD	4	0	1
CCL15	1	2	1
SLC44A4	0	0	1
SPON2	0	0	1
ANGPTL2	1	0	1
ALLC	0	0	1
SLC6A11	0	1	1
CACNA1G	8	0	1
ZNF202	0	0	1
PEX7	0	0	1
DCAF10	0	0	1
TRPM4	0	1	1
PADI1	0	0	1
PAFAH1B1	0	0	1
SLC12A4	4	0	1
SEC31A	0	5	1
S100A5	0	0	1
CRHR2	0	0	1
NNT	1	0	1
EFNA4	0	0	1
SUV420H1	0	0	1
ARFIP2	0	0	1
DENND1B	0	0	1
AIRE	0	0	1
COPS3	0	0	1
PARN	1	0	1
XCR1	1	6	1
POLR2C	0	0	1
RBM26	0	2	1
PAPOLB	0	1	1
HYDIN	0	0	1
PSMD11	0	0	1
TOB2	0	0	1
CDKL1	0	0	1
PRPS1	0	0	1
RAMP3	3	0	1
RAMP2	1	0	1
KIF16B	0	0	1
RGS12	0	0	1
