# Supplementary material for: Reducing the Complexity of Complex Gene Coexpression Networks by Coupling Multiweighted Labeling with Topological Analysis
Source: Biomed Res Int. 2013 Oct 7;2013:676328. doi: 10.1155/2013/676328 (PMC3814072; doi:10.1155/2013/676328)
Supplement: Supplementary file 1 — Global citation summary.xlsx: This file integrates citation data for the three identified list of genes and correlates them with the related disease. These aggregated data enable to rank genes in a disease based on their citation count and to analyze the capability of our tool in selected genes that are highly cited in the literature with the related disease. Disease_citation_heapmap.xlsx: This file reports raw citation data obtained using ProteinQuest to understand if, given a disease, the set of genes selected by our algorithm is highly cocited with the disease while showing low citation count with the other diseases. Data reported in this file are therefore obtained by running the query available in Algorithm 5 of the paper for the identified list of genes for the three considered diseases. [file 676328.f1.zip › global_citation_summary.xlsx]

## Sheet: BC Filtered Genes
List of filtered genes for BC Dataset
GeneSymbol
ERBB2
BRCA1
PGR
IGF1
CDH1
ESR1
MUC1
PRKACG
MAPK1
FN1
ESR2
MMP2
ERBB3
MTOR
AR
IGF1R
TNFSF10
CASP9
CXCL12
RARA
TGFA
MAP2K1
SPP1
CYP1B1
FANCC
EPCAM
KRT14
PRLR
FGFR2
WNT1
PIP
CYP2D6
SMAD3
ELF3
GATA3
NOS2
INSR
TFAP2A
CTSB
MMP3
ADIPOQ
MMP13
PTGER3
MMP11
SCGB2A2
NCAM1
APOD
ODC1
PRKCA
GRB7
GRP
PDGFRB
SKP2
VWF
DBT
VCAM1
KRT7
ADRA1A
ST14
SPDEF
TIMP3
LTF
SPARC
VCAN
HNMT
CXCL10
NRIP1
HMGA2
ERCC2
ABCC3
F11R
SMAD7
UGCG
NAT1
TOX3
DCN
PTCH1
RPS6KA3
ADAM12
IGFBP7
TFF3
POSTN
CTSK
C3
CDH11
APAF1
SDHB
CYP2B6
HSPA1A
CLDN4
EGR3
OGG1
CDC25B
THRA
EXOG
GGPS1
MAPT
DACH1
NRP2
TBX3
CRABP2
SLC39A6
SPHK2
SPINT1
APOE
UBR5
PGK1
CD46
TAGLN
RHOB
IL6ST
RAD52
SERPINA3
SSTR1
SULF1
EFNA1
NRL
CXCL11
CNKSR1
COL1A2
RUNX1
TGFB3
AGR2
AGTR1
PLD1
FAP
PER2
KDM5B
SOX4
EGLN2
WWP1
LRIG1
LGALS3BP
CLDN3
SLC16A1
KSR1
FABP7
PTER
COL3A1
SREBF1
NUMA1
RUNX1T1
FBLN1
HNF1A
NAPA
UPP1
SLC5A7
GPNMB
MTAP
SREBF2
CCNG2
STC2
LUM
SERPINF1
TRIM25
MMP26
PTGER1
BCL3
PPP5C
PRKD1
TRPS1
PTPN22
OPRM1
PPT1
SLC4A7
TPD52
FANCF
GHRHR
NF1
CALCR
LRBA
SEMA3F
TOB1
ARHGAP1
ARF1
ELF5
MAPKAPK2
TACSTD2
LPP
PPARD
IRF6
EDNRA
HOXC6
CA12
INHA
AGTR2
PRKCE
DHPS
THBS2
AZGP1
CXCL14
COL1A1
SPINT2
NOX4
RAB25
FANCE
FXYD3
HINFP
SMOX
KDM4B
CFB
NUPR1
EFS
RPS14
FBN1
AMFR
TNN
RCVRN
PRDX3
RAD51D
MAPK11
PPP2R5D
NR2C1
SCNN1A
MRPS30
BMPR1B
MAP2K5
MAGED2
ACTA2
TACR1
LRP2
PRSS8
GLI3
BHLHE40
A2M
VTCN1
SPAG9
MTNR1A
ENPP1
TPH1
PBX1
GLUL
BHLHE41
TFAP2B
CERS2
NDUFAF4
CTBP2
VAV3
GALNT6
PTPN9
ELSPBP1
SCGB1D2
AMD1
PDGFD
CDH4
NF2
SUCLG1
SLC25A3
PLVAP
BST2
MGP
TBXA2R
FABP4
NFATC4
KRT15
BGN
COLEC10
RARRES1
GP2
SERPING1
DUSP4
NMT1
MBD3
NKX3-1
RXRB
IRX5
SPG7
FZD1
LSR
MED23
KIAA1109
GAS1
PDX1
FBLN2
MXD1
NUDT1
RARRES3
SFRP4
CYB5A
SCUBE2
DARC
WNT2B
VWA5A
LRRC15
FMO2
WNT7A
BAIAP2
NEU3
HRH4
FDX1
COMP
PVRL1
SRPK1
KDM5D
GALNT3
AQP1
ITSN1
C1QA
PIAS2
IFI27
ZFP36L1
SLCO4A1
RPL10
EXTL3
TRIM29
EIF4EBP2
PAX3
IAPP
ACD
FADS1
TNFAIP6
KCNA1
COL11A1
SH3YL1
PATZ1
IGKC
PGAP3
ST6GALNAC2
INHBA
GCK
CHIA
HAP1
KAT6B
RAB31
ITCH
PRR5
IGHA1
NPHP4
ZKSCAN3
RNH1
PRDM16
GGA3
ADCY1
POLI
DIO3
C4A
PSAT1
CERS4
HRH3
HIF3A
CST8
AKAP1
ADCYAP1R1
PIK3R3
INTS6
MAP7
KCNH6
ZNF24
FBP1
CPB1
LGALS8
PRUNE
THBS3
MYOF
ALPPL2
COL14A1
ABCA3
GABRP
DNAJA2
ACOT8
COL10A1
EPHB3
EPHA3
DLX6
ARSB
ATP5B
DST
ARHGAP32
TCP1
TMBIM6
SELENBP1
CDC42EP3
TMPRSS3
ASPN
RASGRF1
ANO1
RPRM
CPSF4
ADAMTS13
COL4A1
EFNB1
SMAD9
EPYC
NASP
ITPR3
TJP3
TLR5
HOXD3
NR6A1
ECHDC1
SETMAR
PIGT
PSME3
SP4
VPS52
MARK2
RGS6
PLXDC1
LRRC32
EXOC3
IFT122
EDA
CERS6
CLDN8
TBCD
CA1
HUS1
RYBP
GJA4
NENF
BRS3
GOLGB1
SCLY
CST1
DPT
HMG20B
MAGEB1
IGLC2
DHODH
ULBP1
GGT5
IL20RA
ELK4
PLCB2
MSH4
MLNR
LDHC
GRIN2B
NLE1
GPLD1
IL13RA1
C1GALT1
ADORA2B
ADRA2A
CYP3A43
HOXC10
COL5A2
XPNPEP1
EPHA5
GRK5
CEP250
SEMA3G
SEPP1
PLIN1
CST4
PEAK1
ITGB6
AKAP9
STRN
NAGLU
SLC23A2
STX2
COL6A1
SLC7A8
CPA2
ACOX3
IPO8
TSPAN13
RCAN1
H2AFJ
ALOX15B
HS3ST3B1
IGF2BP3
LAMA4
DNAJC12
RRBP1
FGF16
NVL
NYX
UST
HOXB2
CPNE3
CTSZ
ARFGEF2
RGS5
TCOF1
ZNF148
RAP2B
PARVB
SF3B3
FOXE3
EDF1
RAB7A
P2RY4
P2RY1
ACSF2
AHNAK
MAML3
CELSR1
ATP2A2
RABEP1
TTLL5
ATP4A
MORC2
SENP3
GJC1
TSTA3
RAB2A
RRP12
BLVRA
COG2
NEBL
CST5
AGFG2
YIPF1
AEBP1
GM2A
ARHGAP19
NUP188
YARS
ACADSB
RPS28
RLBP1
PPFIBP2
DEPTOR
MARCKSL1
NAB1
CYBRD1
CER1
RPL28
ATP6AP1
CNOT4
IGHMBP2
PDE4D
TROVE2
SHANK2
CACNA1D
ZFX
IPO5
EFNB3
PDGFRL
SLC2A10
HOXA11
IGF2BP2
PLAG1
TREX2
ARFIP1
MYO6
IQCK
FGF22
GNS
HOXA4
MAFB
GPATCH2
TTC39A
TBPL1
PDPR
EXD3
SCYL3
LPCAT4
MC2R
GOLPH3L
GUCY2F
INSRR
EIF1B
CACFD1
FMOD
DUSP7
KIAA1324
GALR1
DNAJC7
FBXO21
ZNF8
MEAF6
IFITM3
TTC3
AUTS2
HIST1H4J
CYB561
CLSTN2
PAX4
RNF103
SLC1A7
PRR5-ARHGAP8
GAA
TMC5
COL5A1
MED31
SLC35A2
VPS13C
NEK9
HPCAL1
LAMTOR2
EFHD1
AP2B1
GPX5
RAB6B
CHST15
RBBP6
ATG13
ARR3
ALDH1L1
CRYGA
PLXNB2
PRKAB2
MVD
BLK
KATNB1
ALX3
PPAP2C
FAM134C
C1R
DNAH2
GPR3
L3MBTL1
SIRT6
RPAP1
HOXD12
ADAMTS8
IFNA7
AVPR1A
ASIP
GLRA1
PDE11A
ZNF14
ADCK2
SYNJ2
GUCY1A3
EXOSC9
CLMN
REPS2
CRISPLD2
CCNB1IP1
HIST1H2BD
CCL15
SLC44A4
SPON2
ANGPTL2
ALLC
SLC6A11
CACNA1G
ZNF202
PEX7
DCAF10
TRPM4
PADI1
PAFAH1B1
SLC12A4
SEC31A
S100A5
CRHR2
NNT
EFNA4
SUV420H1
ARFIP2
DENND1B
AIRE
COPS3
PARN
XCR1
POLR2C
RBM26
PAPOLB
HYDIN
PSMD11
TOB2
CDKL1
PRPS1
RAMP3
RAMP2
KIF16B
RGS12

## Sheet: AML Filtered Genes
List of filtered genes for AML Dataset
GeneSymbol
CD34
FLT3
RUNX1
MLL
CD33
MPO
SPI1
KIT
CEBPA
JUN
MYB
FUT4
BCR
RUNX2
CSF3R
HOXA9
MKL1
NFE2
MCL1
ABCC1
FLI1
ETV6
CASP9
IL8
PIK3CB
GATA2
MAPK14
NCOR1
KRAS
MLLT10
SP100
KAT6A
HOXA10
SPN
CBL
FECH
CCNA1
SOD1
ABCC3
JUND
PTGER3
RARB
CBFA2T3
TOP1
CSF2RA
FGFR1
IFNB1
PICALM
NCOA2
CDK6
ETS2
YY1
MBP
NUMA1
CFLAR
HOXA7
HSF1
ERG
LMO2
EWSR1
WISP1
FES
TFAP2A
TEK
CD47
IL18
CASP2
BCRP2
KLF4
PLCG1
PTK2B
LAMP2
CUX1
CA2
CBS
SRGN
IKBKB
ANGPT1
CTSA
ZMYM2
BAD
CDK9
SATB1
HES1
FER
PTPRA
FOXO4
UBA7
SMPD1
TOP2B
HNRPDL
AFF1
PCBP2
SRF
CALCOCO2
NOS1
KAT6B
MBD2
RALGDS
HOXA5
TPMT
HFE
HDAC6
NT5C2
PLEK
CTNNA1
RPL22
RNASE2
ARID4A
EPS15
CASP6
PRKAR2A
PURA
TBXAS1
AKT2
PLD2
MZF1
HOXB3
USF2
ELF1
HHEX
GAB1
MGEA5
SF3B1
TRIM24
SMARCA2
FCGR2B
PDGFA
MAP2K3
KDM6A
HNRNPA1
RPS14
TRAPPC4
COX6B1
PBX3
ICOSLG
DYRK1A
HNRNPK
SMC3
PIK3R1
TNK2
SMO
LYL1
GAS7
C19ORF6
PGF
HLX
FOSB
GNAQ
TSC2
DICER1
PRDX4
F12
ATRX
DUSP6
CTBP1
ITGA9
ZYX
RALBP1
PGD
PKNOX1
HNRNPU
IL5RA
USP7
SOX4
KHDRBS1
IL22
SMARCC1
CABIN1
SLC39A1
MAP2K7
ZNF44
MT1G
GTF2F1
TPSAB1
KIDINS220
VASP
TSHB
TRIM39-RPP21
SRRM1
SRY
NR6A1
N4BP1
MEF2A
MAN2C1
PLD1
KRT10
SAP130
CXCL2
UBTF
PARK7
PCM1
TLE4
CCL23
BUB1
PVR
SMAD1
MCAM
ACIN1
SFPQ
MAPKAPK2
PEG10
ARHGDIA
PAX3
PTGER2
NCSTN
MNT
NR1H2
APTX
MAP3K11
RBX1
PPIA
NUCB2
MDM4
RCHY1
H3F3B
APBB1IP
RNH1
LGALS9
CCNT1
ACTR2
FLOT1
CENPJ
SARS2
EIF4A1
EHMT2
PRDM2
PLAGL1
HAX1
FRK
TPSG1
ATXN3
GNAS
EEF2
KDM2A
NIPBL
TAF1
IGF2R
CHD4
CREB3
CHMP5
NOTCH2
SPEN
SPR
PPP1R12A
PKM
NTF3
ATF7IP
SERPINB1
PTP4A2
GNA15
RAB9A
ATF6
ID3
TACSTD2
RNF7
EIF3A
KLHL24
NLRP3
RPA3
LRRC16A
TADA2A
HADHA
SCN10A
DDX3X
DDX41
DHDDS
TBL1X
EIF2B3
SUCLG1
RHEB
ITPR3
ITPR2
THRB
DDX39B
FRAS1
EIF4G2
ELF2
DGUOK
RNF19A
MANBA
STAB1
TDRKH
PHACTR1
CAT
IL1RL1
MAML1
ZBTB24
ZFP36L2
BRE
TGOLN2
GTF2H3
CIAO1
TCEB2
BTRC
CPA3
FOSL2
RPS3A
KDM5A
M6PR
SF1
TLX3
HOXD9
NAPA
LLGL1
HLCS
NRL
GRN
RASGRP2
LARS
MSH6
OGT
DUSP10
PDX1
NR4A2
FKBP8
PRPF8
HNRNPA3
PDPK1
JARID2
MBOAT7
NINL
SLC25A28
FIS1
CARD9
MTM1
PIKFYVE
PELO
EEA1
GLIPR1
SOS2
TBC1D3
CAPN1
MAU2
EIF5
CRADD
ST7L
TOPORS
RRAS2
DEC1
TSPAN32
KDM3B
SMC5
IPPK
CFD
EFNA5
LAMB3
PTPN12
CDR2
ANKRD28
RB1CC1
SRRM2
LYST
RNF17
REEP5
RHOT2
ATG16L1
GUK1
TLN1
GSTO1
PSTPIP2
COA1
ITSN2
SART1
MAP3K9
PTBP3
PATZ1
NPC1
ROR1
ARIH1
ARG2
SRSF5
COL14A1
SRSF7
SRSF6
OPRM1
ZNF148
IL1RAP
ANP32A
ELMO1
THOC2
SCAF11
BRD3
HNRNPUL2
RBM15B
PASK
NDUFAB1
IDS
ARRB1
TFEC
ATP7A
P2RX4
P2RX1
P2RX2
MAZ
PPP2R1B
ARL1
PKN2
TXNRD2
NFATC4
NFATC3
XPNPEP1
WNK1
LHX3
HIP1
RNF2
GNB2L1
PPARD
ZEB2
ATP5L
AGPAT2
CD164
FKBP15
CETN1
AZU1
ATXN2L
BCL9
NPR3
SCLY
TRIM32
DIAPH1
DIAPH3
HEG1
EIF3L
UBAP2L
TP53I11
EIF4B
UBE2E1
COPA
CD97
LAIR1
COX4I1
SAFB
UBE4B
TUBGCP2
ZC3H11A
CSN3
XRCC2
NAA15
INTS8
MAP2K5
MYO18A
RPS21
PTH2R
MAGEB4
TLL2
ZNF292
NAP1L1
CREG1
SYMPK
ARHGEF5
RPL35
GNG11
ZNF32
PER1
MT1F
RBM5
TNFSF12
IQGAP1
ANK3
SPTLC2
ADAM21
HNRNPH1
PEX2
ARID5B
NCOA4
CHD1L
INPP5B
SH3BGRL3
GGA3
TAF7L
H2AFY
POLG
SRP72
ADD1
KIAA0146
GAD2
PBRM1
CBR3
PSEN1
GTF2I
POLR2F
GNPTAB
ILF3
POLR3B
MAPK13
PSMD10
HOXC5
RBM10
PSMA2
MAP4K5
PI4K2A
GML
ZMYM4
ZMYM5
TACR3
PAK2
TPP1
TM9SF4
KIAA0100
HIPK3
SCARF1
ADNP2
ANXA11
PLGRKT

## Sheet: DLCL Filtered Genes
List of filtered genes for DLCL Dataset
GeneSymbol
MS4A1
CD19
CD40
CD79A
CD22
IL10
CR2
BIRC3
PAX5
CD80
CD27
PARP1
AICDA
RB1
TCL1A
CXCR5
CD79B
CXCL13
RELB
BLNK
GRB2
SYK
NFATC1
MMP9
CD70
CD72
POU2AF1
ENTPD1
TCF3
IRF8
CXCL9
BCL11A
TERT
BACH2
CCL19
ETS1
SPIB
PLCG2
IL21R
UBC
HLA-DQA1
HLA-DQB1
RFX5
UBE2N
LTBR
VPREB3
APP
KCND1
IGHM
CSNK1A1
SMARCB1
RASGRP3
TCL1B
RGS13
IKZF3
LRMP
CD1C
BATF
HRK
WEE1
TFEB
ITGA6
HLA-DMA
GALNS
SWAP70
BIK
NQO2
BLK
TMPO
PIAS2
UBE2D2
SH2B2
ENPP2
FKBP1A
CCL18
SIT1
NR1H3
TRIO
MMP12
CTNNBIP1
SLC15A3
GRIK2
MLL4
TFE3
RNF11
E2F5
HLA-DMB
CXCR6
UBD
TPMT
ADAMDEC1
RXRA
DCAF7
HLA-DOA
OSBPL2
NPL
CETP
CTBP2
GRHPR
LRPAP1
SERPINB6
HTR3A
AFF3
ME3
CNR2
CYB5R2
SGPP1
PKN2
MCM5
CTSH
TCF7L2
ZNF804A
NF1
SH3BP5
TMEM243

## Sheet: Citation data
GeneSymbol	Breast Neoplasms Citations	Leukemia, Myeloid, Acute Citations	Lymphoma, B-Cell Citations	Gene in BC Filtered Genes	Gene in AML Filtered Genes	Gene in DLCL Filtered Genes	BC Gene Citation Ranking	AML Gene Citation Ranking	DLCL Gene Citation Ranking
ERBB2	19796	64	96	1	0	0	1	307	151
BRCA1	8194	25	15	1	0	0	2	659	732
EGFR	7685	189	90	0	0	0	3	117	162
PGR	6773	7	15	1	0	0	4	1644	733
CYP19A1	4742	8	4	0	0	0	5	1501	1714
BRCA2	4502	36	12	0	0	0	6	494	841
EGF	4220	109	80	0	0	0	7	194	186
MKI67	3699	100	696	0	0	0	8	209	19
GAPDH	3603	1021	749	0	0	0	9	16	15
BCL2	3388	1236	3526	0	0	0	10	13	2
CCND1	3288	145	829	0	0	0	11	152	12
VEGFA	3062	290	277	0	0	0	12	77	61
IGF1	2731	113	78	1	0	0	13	188	192
CDH1	2600	45	25	1	0	0	14	430	495
TNF	2549	1487	1066	0	0	0	15	8	8
MYC	2521	1264	2740	0	0	0	16	11	3
ESR1	2354	9	8	1	0	0	17	1382	1122
CASP3	2285	824	784	0	0	0	18	25	13
MUC1	2271	28	136	1	0	0	19	597	104
AKT1	2215	327	250	0	0	0	20	64	64
MAPK3	2002	384	216	0	0	0	21	55	74
PRKACG	1959	397	293	1	0	0	22	49	57
PRL	1660	25	14	0	0	0	23	660	761
MAPK1	1650	398	234	1	0	0	24	47	66
INS	1612	169	68	0	0	0	25	129	220
PIK3CA	1555	214	220	0	0	0	26	101	71
CD44	1485	167	219	0	0	0	27	131	72
FAM89B	1407	6	47	0	0	0	28	1797	310
PIK3CG	1397	213	219	0	0	0	29	102	73
CD34	1137	3110	429	0	1	0	46	1	36
PIK3CD	1353	210	223	0	0	0	31	103	69
MS4A1	183	207	3584	0	0	1	310	107	1
ALB	1343	423	177	0	0	0	33	46	85
PTEN	1336	73	84	0	0	0	34	266	176
CDKN1A	1318	234	185	0	0	0	35	92	83
ACTB	1290	516	334	0	0	0	36	40	47
ANXA5	1267	997	611	0	0	0	37	17	22
VIM	1234	92	113	0	0	0	38	225	132
IL6	1233	766	714	0	0	0	39	26	18
FLT3	38	2263	27	0	1	0	1196	4	470
FN1	1227	295	130	1	0	0	41	74	110
ESR2	1193	7	5	1	0	0	42	1645	1538
MMP2	1179	68	73	1	0	0	43	289	207
PLAUR	1167	67	37	0	0	0	44	293	360
CSF3	1161	1575	261	0	0	0	45	7	63
RUNX1	53	2125	111	1	1	0	927	5	135
ERBB3	1129	0	2	1	0	0	47	5288	2289
COX2	1120	51	90	0	0	0	48	376	163
MAPK8	1115	369	280	0	0	0	49	58	60
CYP4F3	1110	107	19	0	0	0	50	195	608
ABCB1	1050	539	71	0	0	0	51	36	213
STAT3	1028	385	317	0	0	0	52	54	50
CEACAM4	1016	19	14	0	0	0	53	809	762
CEACAM16	1015	14	16	0	0	0	54	1021	700
CEACAM8	1014	33	19	0	0	0	55	528	609
CEACAM3	1009	14	14	0	0	0	56	1022	763
CEACAM7	1009	13	14	0	0	0	57	1089	764
PSG2	999	12	14	0	0	0	58	1148	765
PLG	981	221	45	0	0	0	59	97	317
CTSD	975	24	15	0	0	0	60	676	734
MTOR	965	191	167	1	0	0	61	116	88
AR	962	47	13	1	0	0	62	409	801
IL2	947	825	1170	0	0	0	63	24	7
CDK2	943	132	130	0	0	0	64	160	111
PCNA	934	75	145	0	0	0	65	257	97
PLAU	904	83	50	0	0	0	66	234	290
CD24	900	28	71	0	0	0	67	598	214
IGF1R	898	36	13	1	0	0	68	495	802
NRG1	874	0	1	0	0	0	69	5289	2965
HRAS	867	309	81	0	0	0	70	70	184
CXCR4	849	201	96	0	0	0	71	109	152
CDKN2A	839	249	386	0	0	0	72	86	40
CSF2	814	2269	324	0	0	0	73	3	49
CASP8	793	263	299	0	0	0	74	82	55
HIF1A	790	51	58	0	0	0	75	377	258
BIRC5	767	197	119	0	0	0	76	112	127
CD19	105	532	1489	0	0	1	528	37	5
TGFB1	766	125	73	0	0	0	78	169	208
IFNG	764	553	512	0	0	0	79	35	27
CYCS	759	292	282	0	0	0	80	75	59
PTK2	754	32	31	0	0	0	81	540	426
TNFSF10	742	241	162	1	0	0	82	88	91
CD40	111	80	675	0	0	1	506	243	20
IGFBP3	721	9	5	0	0	0	84	1383	1539
ERBB4	720	1	6	0	0	0	85	3645	1385
CAV1	708	10	5	0	0	0	86	1284	1540
BCL2L1	706	353	597	0	0	0	87	61	23
PTGS2	706	42	56	0	0	0	88	440	272
MDM2	703	120	215	0	0	0	89	173	75
SERPINE1	693	66	23	0	0	0	90	297	523
MLL	63	1324	94	0	1	0	797	10	158
CXCL12	683	146	104	1	0	0	92	150	143
NFKB1	680	188	444	0	0	0	93	119	31
CDKN1B	673	119	211	0	0	0	94	175	76
SRC	670	73	27	0	0	0	95	267	460
TFF1	667	1	0	0	0	0	96	3646	4615
CTNNB1	663	49	37	0	0	0	97	395	361
FOS	659	261	128	0	0	0	98	83	114
ABCG2	645	158	25	0	0	0	99	138	496
NCOA3	645	12	8	0	0	0	100	1149	1123
CYP1A1	634	24	19	0	0	0	101	677	610
CD33	63	1138	85	0	1	0	798	14	174
PIK3R4	628	117	98	0	0	0	103	178	149
SHBG	624	0	0	0	0	0	104	5290	4616
CDK4	621	95	123	0	0	0	105	220	119
KRT19	615	4	4	0	0	0	106	2200	1715
IGF2	602	40	8	0	0	0	107	459	1124
RAD51	598	35	5	0	0	0	108	504	1541
KDR	597	127	62	0	0	0	109	166	245
CDK1	589	155	77	0	0	0	110	140	195
RARA	580	1950	33	1	0	0	111	6	406
HGF	580	81	71	0	0	0	112	241	215
FGF2	554	53	47	0	0	0	113	362	311
MPO	69	980	84	0	1	0	743	18	178
GNRH1	552	9	3	0	0	0	115	1384	1947
TGFA	546	21	11	1	0	0	116	752	894
ATM	545	24	54	0	0	0	117	678	278
HSP90AA1	538	131	80	0	0	0	118	162	187
CCL2	532	112	41	0	0	0	119	191	337
PTHLH	516	8	35	0	0	0	120	1502	383
CHEK2	510	48	31	0	0	0	121	401	427
CCNA2	494	120	88	0	0	0	122	174	167
MIB1	488	7	159	0	0	0	123	1646	93
BAX	484	153	263	0	0	0	124	142	62
MAP2K1	483	111	70	1	0	0	125	192	216
VDR	467	117	22	0	0	0	126	179	540
SPP1	464	29	23	1	0	0	127	574	524
MET	456	29	63	0	0	0	128	575	236
TOP2A	454	74	21	0	0	0	129	261	562
KIT	169	765	68	0	1	0	332	27	222
E2F1	440	55	87	0	0	0	131	351	172
CYP1B1	440	2	3	1	0	0	132	2957	1948
IL4	434	354	730	0	0	0	133	60	17
FANCC	431	71	4	1	0	0	134	278	1716
LEP	430	25	17	0	0	0	135	661	668
EPCAM	429	5	19	1	0	0	136	1977	611
HDAC9	427	316	85	0	0	0	137	68	173
IRS1	423	6	25	0	0	0	138	1798	497
KRT18	413	0	8	0	0	0	139	5291	1125
RPLP0	409	7	14	0	0	0	140	1647	766
TIMP1	406	66	81	0	0	0	141	298	185
STAT5A	404	210	76	0	0	0	142	105	198
RHOA	399	52	23	0	0	0	143	364	525
CHD7	395	17	13	0	0	0	144	869	803
MMP14	395	4	2	0	0	0	145	2201	2290
CCNB1	391	51	37	0	0	0	146	378	362
RPS6KB1	390	75	65	0	0	0	147	258	228
NME1	389	49	45	0	0	0	148	396	318
STAT5B	388	222	58	0	0	0	149	96	259
KRT5	386	3	3	0	0	0	150	2530	1949
SERPINB5	385	0	2	0	0	0	151	5292	2291
MMP1	384	9	10	0	0	0	152	1385	958
KRT14	383	2	5	1	0	0	153	2958	1542
RAC1	380	44	51	0	0	0	154	433	286
FAS	375	146	544	0	0	0	155	151	25
PTPRC	372	600	744	0	0	0	156	34	16
SULT2A1	372	7	0	0	0	0	157	1648	4617
TNFSF11	368	5	30	0	0	0	158	1978	434
PRLR	363	3	0	1	0	0	159	2531	4618
GSTP1	354	56	32	0	0	0	160	344	417
FGFR2	351	10	3	1	0	0	161	1285	1950
PRKACA	347	76	41	0	0	0	162	255	338
SOD2	347	44	26	0	0	0	163	434	475
SMAD2	345	39	32	0	0	0	164	470	418
RAF1	342	113	48	0	0	0	165	189	302
H2AFX	342	73	30	0	0	0	166	268	435
TK1	337	165	89	0	0	0	167	132	164
WNT1	335	4	2	1	0	0	168	2202	2292
CD79A	21	78	535	0	0	1	1845	253	26
HDAC1	332	171	57	0	0	0	170	125	265
JAK2	328	456	76	0	0	0	171	44	199
CD8A	328	238	373	0	0	0	172	91	42
SST	325	9	22	0	0	0	173	1386	541
AHR	324	10	9	0	0	0	174	1286	1035
IL1B	323	322	134	0	0	0	175	66	107
STS	322	1	1	0	0	0	176	3647	2966
PIP	318	0	0	1	0	0	177	5293	4619
PPARG	316	46	34	0	0	0	178	419	394
PAK1	316	4	21	0	0	0	179	2203	563
CYP2D6	312	10	0	1	0	0	180	1287	4620
SMAD3	309	35	37	1	0	0	181	505	363
CASP7	306	33	67	0	0	0	182	529	225
TYMS	303	51	26	0	0	0	183	379	476
FASLG	302	98	172	0	0	0	184	213	86
ITGB1	299	72	46	0	0	0	185	272	314
VCL	299	33	9	0	0	0	186	530	1036
STAT1	297	148	122	0	0	0	187	148	122
CD22	10	79	472	0	0	1	2961	251	29
IL12B	290	104	162	0	0	0	189	201	92
CDH2	290	6	2	0	0	0	190	1799	2293
RASSF1	290	5	10	0	0	0	191	1979	959
NCOA1	287	11	3	0	0	0	192	1209	1951
NR3C1	285	62	48	0	0	0	193	314	303
COMT	284	0	4	0	0	0	194	5294	1717
CDC42	283	42	38	0	0	0	195	441	355
PXN	283	15	21	0	0	0	196	963	564
FLT1	282	96	43	0	0	0	197	216	330
F2	280	240	61	0	0	0	198	89	248
ICAM1	280	220	296	0	0	0	199	99	56
SLC5A5	279	4	2	0	0	0	200	2204	2294
MLH1	278	20	34	0	0	0	201	782	395
SPI1	7	764	75	0	1	0	3567	28	203
HSPB1	276	32	17	0	0	0	203	541	669
TIMP2	273	16	23	0	0	0	204	912	526
IL12A	272	99	150	0	0	0	205	212	94
DUT	271	72	96	0	0	0	206	274	153
VEGFC	269	22	16	0	0	0	207	730	701
TWIST1	269	8	0	0	0	0	208	1503	4621
ELF3	268	9	1	1	0	0	209	1387	2967
GPER	266	0	3	0	0	0	210	5295	1952
SP1	261	73	32	0	0	0	211	269	419
FOXP3	261	55	106	0	0	0	212	352	141
SMAD4	261	52	27	0	0	0	213	365	461
GATA3	260	25	17	1	0	0	214	662	670
THBS1	258	17	8	0	0	0	215	870	1126
H1F0	257	94	36	0	0	0	216	224	368
CALCA	257	37	10	0	0	0	217	484	960
LGALS3	257	27	32	0	0	0	218	619	420
CYP3A4	254	37	2	0	0	0	219	485	2295
FOXO3	253	51	29	0	0	0	220	380	442
TNFRSF11A	253	4	22	0	0	0	221	2205	542
TP63	251	13	33	0	0	0	222	1090	407
AREG	250	2	0	0	0	0	223	2959	4622
NOS2	249	49	65	1	0	0	224	397	229
MUC16	249	7	11	0	0	0	225	1649	895
XIAP	248	175	113	0	0	0	226	124	133
ITGAM	247	850	122	0	0	0	227	22	123
TNFRSF10B	247	79	54	0	0	0	228	245	279
INSR	242	37	28	1	0	0	229	486	450
CREB1	241	107	94	0	0	0	230	196	157
DNMT1	240	139	15	0	0	0	231	156	735
HSP90B1	239	46	33	0	0	0	232	420	408
SLC2A1	238	16	12	0	0	0	233	913	842
CEBPA	50	638	23	0	1	0	983	31	530
VTN	235	40	14	0	0	0	235	460	767
PPP3R1	235	4	3	0	0	0	236	2206	1953
TF	234	343	92	0	0	0	237	62	160
JUN	1368	490	305	0	1	0	30	41	52
POMC	233	24	26	0	0	0	239	679	477
JUNB	232	103	93	0	0	0	240	204	159
NOTCH1	232	55	55	0	0	0	241	353	276
KRT8	229	0	4	0	0	0	242	5296	1718
FUT4	88	393	206	0	1	0	600	51	78
GSK3B	228	55	63	0	0	0	244	354	237
MSH2	228	18	41	0	0	0	245	841	339
SNAI1	228	4	8	0	0	0	246	2207	1128
EZH2	226	82	51	0	0	0	247	238	287
MYB	150	392	89	0	1	0	379	52	165
BCR	34	392	632	0	1	0	1319	53	21
CHEK1	225	52	30	0	0	0	250	366	436
AURKA	225	32	19	0	0	0	251	542	612
CD68	223	111	170	0	0	0	252	193	87
CTSB	223	18	23	1	0	0	253	842	527
EPHA4	222	106	84	0	0	0	254	199	177
TBP	222	61	43	0	0	0	255	318	331
FOXA1	222	3	1	0	0	0	256	2532	2968
RPA1	221	29	51	0	0	0	257	576	288
MMP3	221	6	9	1	0	0	258	1800	1037
IL10	333	102	431	0	0	1	169	206	34
EPO	219	869	30	0	0	0	260	20	437
RELA	219	56	83	0	0	0	261	345	179
PHB2	218	0	0	0	0	0	262	5297	4623
TPTE	216	15	24	0	0	0	263	964	504
TNC	216	13	8	0	0	0	264	1091	1129
DNASE1	215	462	119	0	0	0	265	43	128
LPA	214	21	9	0	0	0	266	753	1038
MFGE8	213	14	10	0	0	0	267	1023	961
HPRT1	212	153	82	0	0	0	268	143	182
GH1	211	29	16	0	0	0	269	577	702
CR2	12	42	394	0	0	1	2653	451	38
ADIPOQ	210	7	3	1	0	0	271	1650	1954
IFNA1	209	337	362	0	0	0	272	63	45
EIF4EBP1	209	68	35	0	0	0	273	292	384
NQO1	209	62	9	0	0	0	274	315	1039
BCAR1	207	4	11	0	0	0	275	2208	896
PTH	206	29	22	0	0	0	276	578	543
MMP13	206	13	0	1	0	0	277	1092	4624
FASN	206	6	12	0	0	0	278	1801	843
CD4	205	193	394	0	0	0	279	115	37
RUNX2	164	372	3	0	1	0	344	57	1958
CRP	204	47	60	0	0	0	281	410	251
HTRA1	204	5	2	0	0	0	282	1980	2296
DNTT	202	283	165	0	0	0	283	79	89
NBN	200	13	21	0	0	0	284	1093	567
NCAM1	199	487	301	1	0	0	285	42	53
CCL5	198	35	50	0	0	0	286	506	291
MMP11	198	0	0	1	0	0	287	5298	4625
RICTOR	197	44	40	0	0	0	288	435	343
CTTN	196	1	3	0	0	0	289	3648	1955
CAPN2	195	65	57	0	0	0	290	306	266
HNF4A	195	35	12	0	0	0	291	507	844
S100A4	195	7	2	0	0	0	292	1651	2297
ALDH1A1	195	6	4	0	0	0	293	1802	1719
TNFRSF11B	194	6	8	0	0	0	294	1803	1130
TFRC	193	398	124	0	0	0	295	48	118
CSF3R	11	323	13	0	1	0	2793	65	829
PROM1	192	86	7	0	0	0	297	232	1253
PSG5	192	79	134	0	0	0	298	246	108
HSPA5	192	42	28	0	0	0	299	442	451
APC	191	19	11	0	0	0	300	810	897
TYMP	190	4	3	0	0	0	301	2209	1956
SCGB2A2	190	0	0	1	0	0	302	5299	4626
MME	189	300	1325	0	0	0	303	72	6
BRIP1	189	2	1	0	0	0	304	2960	2969
ETV4	188	11	1	0	0	0	305	1210	2970
CSF1	187	105	18	0	0	0	306	200	641
HOXA9	27	310	3	0	1	0	1575	69	2035
PELP1	185	0	0	0	0	0	308	5300	4627
EIF4E	184	59	26	0	0	0	309	329	478
PAX5	38	50	364	0	0	1	1201	392	44
PALB2	183	0	2	0	0	0	311	5301	2298
PECAM1	182	35	28	0	0	0	312	508	452
GSTM1	180	52	13	0	0	0	313	367	804
ITGAV	180	18	6	0	0	0	314	843	1386
ODC1	179	60	14	1	0	0	315	322	768
NMU	179	8	1	0	0	0	316	1504	2971
EPHA2	179	0	0	0	0	0	317	5302	4628
FTMT	178	257	39	0	0	0	318	84	350
YBX1	178	2	3	0	0	0	319	2961	1957
MAPK9	177	60	50	0	0	0	320	323	292
BMI1	177	51	44	0	0	0	321	382	326
APOD	176	0	0	1	0	0	322	5303	4629
ENG	175	11	8	0	0	0	323	1211	1131
HLA-A	173	148	114	0	0	0	324	149	130
FLT4	173	39	16	0	0	0	325	472	703
ZEB1	173	4	11	0	0	0	326	2210	898
BIRC3	135	29	356	0	0	1	424	580	46
CCNE1	172	9	12	0	0	0	328	1388	845
BARD1	171	0	0	0	0	0	329	5304	4630
MKL1	7	298	3	0	1	0	3568	73	2144
WFIKKN1	170	0	0	0	0	0	331	5305	4631
NFE2	1	269	1	0	1	0	6836	81	4005
PLAT	169	70	10	0	0	0	333	281	962
CBX2	169	60	36	0	0	0	334	324	369
CDC25C	169	52	27	0	0	0	335	368	463
CYP17A1	169	1	6	0	0	0	336	3649	1387
IGFBP1	168	6	4	0	0	0	337	1804	1720
TNFRSF10A	167	66	39	0	0	0	338	300	351
XRCC1	167	14	6	0	0	0	339	1024	1388
CDH3	167	1	1	0	0	0	340	3650	2972
DHFR	166	113	40	0	0	0	341	190	344
PML	165	2919	143	0	0	0	342	2	98
ABL1	164	863	203	0	0	0	343	21	79
MCL1	225	250	308	0	1	0	249	85	51
NCL	164	28	35	0	0	0	345	599	385
GADD45A	163	28	15	0	0	0	346	600	736
PIN1	163	20	1	0	0	0	347	783	2973
BSG	163	5	21	0	0	0	348	1981	568
NCOR2	162	137	27	0	0	0	349	157	464
SDC1	162	24	368	0	0	0	350	680	43
CA9	162	8	1	0	0	0	351	1505	2974
POU5F1	161	7	5	0	0	0	352	1652	1543
GRP	161	6	4	1	0	0	353	1805	1721
PRKCA	160	96	24	1	0	0	354	217	506
COL18A1	160	24	14	0	0	0	355	681	769
BECN1	159	23	28	0	0	0	356	703	453
TGFBR1	159	9	6	0	0	0	357	1389	1389
GRB7	159	1	1	1	0	0	358	3651	2975
PDGFRB	158	71	15	1	0	0	359	279	737
MTHFR	158	23	23	0	0	0	360	704	528
CD14	157	686	140	0	0	0	361	30	99
SCGB1A1	157	0	2	0	0	0	362	5306	2299
TTC21B	157	0	0	0	0	0	363	5307	4632
IL3	156	1342	147	0	0	0	364	9	96
EBP	156	31	36	0	0	0	365	555	370
BGLAP	156	30	7	0	0	0	366	561	1254
SKP2	156	20	39	1	0	0	367	784	352
FOXM1	156	20	8	0	0	0	368	785	1132
CTGF	155	1	7	0	0	0	369	3652	1255
HSD17B7	155	0	0	0	0	0	370	5308	4633
IGFBP5	154	4	0	0	0	0	371	2211	4634
TGM2	153	25	6	0	0	0	372	664	1390
FGF1	153	20	5	0	0	0	373	786	1544
EGR1	152	132	67	0	0	0	374	161	226
LMNA	152	32	15	0	0	0	375	543	738
GJA1	152	16	14	0	0	0	376	914	770
STK11	152	5	14	0	0	0	377	1982	771
LALBA	152	4	4	0	0	0	378	2212	1722
ABCC1	276	247	21	0	1	0	202	87	565
PPP1R1A	150	18	5	0	0	0	380	844	1545
CD80	136	144	221	0	0	1	420	153	70
AFP	148	17	16	0	0	0	382	872	704
TLR1	148	11	49	0	0	0	383	1212	296
TP53BP1	148	2	8	0	0	0	384	2962	1133
FGF3	148	2	4	0	0	0	385	2963	1723
HMGCR	147	35	19	0	0	0	386	509	613
GLI2	145	1062	121	0	0	0	387	15	125
CREBBP	145	100	31	0	0	0	388	210	428
MEFV	145	78	35	0	0	0	389	252	386
SELE	145	60	16	0	0	0	390	325	705
VWF	144	83	26	1	0	0	391	236	479
CCND2	144	52	130	0	0	0	392	369	113
ELK1	144	25	15	0	0	0	393	665	739
ARNT	144	11	12	0	0	0	394	1213	846
WNT5A	144	2	4	0	0	0	395	2964	1724
FOXO1	143	24	34	0	0	0	396	682	397
FHIT	143	21	19	0	0	0	397	754	614
CEBPB	142	83	49	0	0	0	398	237	297
CCND3	142	74	112	0	0	0	399	262	134
FANCD2	142	28	4	0	0	0	400	601	1725
PLK1	142	23	10	0	0	0	401	705	963
TERF1	141	51	17	0	0	0	402	383	671
IGFBP2	141	15	4	0	0	0	403	965	1726
DPEP1	141	14	13	0	0	0	404	1025	805
DES	141	7	18	0	0	0	405	1653	643
RHOC	141	6	1	0	0	0	406	1806	2976
PTK6	141	2	2	0	0	0	407	2965	2300
CSF1R	140	285	25	0	0	0	408	78	498
CYP1A2	140	5	3	0	0	0	409	1983	1959
LOX	140	1	1	0	0	0	410	3653	2977
NRP1	139	23	3	0	0	0	411	706	1960
LYPD4	139	15	4	0	0	0	412	966	1727
ADAM17	139	3	4	0	0	0	413	2533	1728
MTA1	139	3	15	0	0	0	414	2534	740
SPHK1	138	19	6	0	0	0	415	811	1391
RNF123	138	16	34	0	0	0	416	915	398
SNCG	138	1	1	0	0	0	417	3654	2978
IL1A	137	95	63	0	0	0	418	221	238
ITGB3	136	160	8	0	0	0	419	134	1134
CD27	23	21	139	0	0	1	1756	771	102
FANCA	136	128	4	0	0	0	421	165	1729
CSK	136	10	3	0	0	0	422	1288	1961
CD28	135	73	188	0	0	0	423	270	82
PARP1	730	158	127	0	0	1	83	137	116
SHC1	135	28	17	0	0	0	425	602	672
NME7	135	20	11	0	0	0	426	787	899
RALA	135	7	2	0	0	0	427	1654	2301
DPYD	135	3	3	0	0	0	428	2535	1962
VCAM1	134	76	77	1	0	0	429	256	196
PPP2R4	134	59	22	0	0	0	430	330	544
CDC25A	134	29	21	0	0	0	431	581	569
CEACAM6	134	17	8	0	0	0	432	873	1135
DBT	134	4	0	1	0	0	433	2213	4635
SRA1	134	2	2	0	0	0	434	2966	2302
SDHAF2	133	28	35	0	0	0	435	603	387
MRE11A	133	11	5	0	0	0	436	1214	1546
IBSP	133	10	2	0	0	0	437	1289	2303
CLU	133	3	21	0	0	0	438	2536	570
BLID	133	0	1	0	0	0	439	5309	2979
SPAG8	133	0	0	0	0	0	440	5310	4636
TCF4	132	23	4	0	0	0	441	707	1730
ENO1	132	15	14	0	0	0	442	967	772
EZR	132	12	6	0	0	0	443	1150	1392
RAD50	132	11	6	0	0	0	444	1215	1393
PRKAA1	132	9	15	0	0	0	445	1390	741
HSPA8	131	60	34	0	0	0	446	326	399
IRS2	131	10	17	0	0	0	447	1290	673
NDC80	131	7	7	0	0	0	448	1655	1256
FLI1	24	231	10	0	1	0	1691	93	991
SERPINB2	129	26	24	0	0	0	450	641	508
KRT7	129	2	5	1	0	0	451	2967	1547
F2R	128	62	8	0	0	0	452	316	1136
CCL16	128	4	8	0	0	0	453	2214	1137
ST14	127	4	2	1	0	0	454	2215	2304
CYR61	127	1	1	0	0	0	455	3655	2980
ENO2	126	63	36	0	0	0	456	312	371
ETV6	29	228	64	0	1	0	1486	95	234
EMR1	126	30	21	0	0	0	458	562	571
ADRA1A	126	19	49	1	0	0	459	812	298
COX1	126	15	10	0	0	0	460	968	964
GSTT1	125	52	11	0	0	0	461	370	900
PHB	125	5	1	0	0	0	462	1984	2981
SULT1A1	125	1	0	0	0	0	463	3656	4637
NES	124	23	9	0	0	0	464	708	1040
CTCF	124	15	26	0	0	0	465	969	480
HSD17B1	124	0	0	0	0	0	466	5311	4638
CYP24A1	123	17	0	0	0	0	467	874	4639
NPCDR1	123	16	439	0	0	0	468	916	32
CEACAM1	123	4	13	0	0	0	469	2216	806
SOX2	123	2	7	0	0	0	470	2968	1257
BRMS1	123	0	0	0	0	0	471	5312	4640
MAP2K4	122	42	21	0	0	0	472	443	572
NGF	122	36	26	0	0	0	473	496	481
SFRP1	122	10	0	0	0	0	474	1291	4641
TGFBR2	122	7	8	0	0	0	475	1656	1138
JAG1	121	38	28	0	0	0	476	480	454
CISH	121	20	19	0	0	0	477	788	615
KRT20	121	6	2	0	0	0	478	1807	2305
RPS6	120	46	35	0	0	0	479	421	388
BIRC2	120	30	78	0	0	0	480	563	194
BAG1	120	16	16	0	0	0	481	917	706
SPDEF	120	0	0	1	0	0	482	5313	4642
PRKAB1	119	9	20	0	0	0	483	1391	587
PFN1	119	6	7	0	0	0	484	1808	1258
CASP9	688	210	237	1	1	0	91	104	65
MAP3K1	118	22	17	0	0	0	486	731	674
TIMP3	118	7	8	1	0	0	487	1657	1139
DUSP1	118	6	8	0	0	0	488	1809	1140
SYP	118	6	17	0	0	0	489	1810	675
TREH	117	30	18	0	0	0	490	564	645
NDN	117	21	12	0	0	0	491	755	847
XRCC6	117	9	12	0	0	0	492	1392	848
PRKDC	116	16	19	0	0	0	493	918	616
MMP7	115	4	7	0	0	0	494	2217	1259
HPSE	114	12	2	0	0	0	495	1151	2306
SIRT1	114	9	12	0	0	0	496	1393	849
GLI1	114	8	30	0	0	0	497	1506	438
CCR7	113	40	54	0	0	0	498	461	280
IL8	553	198	130	0	1	0	114	111	112
GHRH	113	2	6	0	0	0	500	2969	1394
LTF	112	79	10	1	0	0	501	247	965
PIK3CB	1232	194	202	0	1	0	40	114	80
NOS3	112	11	26	0	0	0	503	1216	482
F3	111	117	10	0	0	0	504	180	966
IRF1	111	98	50	0	0	0	505	214	293
RB1	766	126	122	0	0	1	77	168	121
HDAC2	111	55	21	0	0	0	507	355	573
LEPR	111	20	3	0	0	0	508	789	1964
GATA2	12	181	6	0	1	0	2646	123	1471
FOSL1	111	7	3	0	0	0	510	1658	1965
DIABLO	110	50	45	0	0	0	511	389	319
ACP5	110	11	36	0	0	0	512	1217	372
PDXP	110	6	12	0	0	0	513	1811	850
VIP	109	20	6	0	0	0	514	790	1395
DKK1	109	7	4	0	0	0	515	1659	1732
STMN1	108	44	5	0	0	0	516	436	1548
TAP1	108	17	65	0	0	0	517	875	230
XRCC3	108	17	4	0	0	0	518	876	1733
ITGAX	107	159	110	0	0	0	519	136	137
IL11	107	60	6	0	0	0	520	327	1396
MGMT	107	40	54	0	0	0	521	462	281
SULT1E1	107	0	0	0	0	0	522	5314	4644
PTPN11	106	103	56	0	0	0	523	205	273
HMGA1	106	26	27	0	0	0	524	642	465
FGFR4	106	15	10	0	0	0	525	970	967
CSN2	106	13	6	0	0	0	526	1094	1397
ILK	106	8	3	0	0	0	527	1507	1966
AICDA	3	1	122	0	0	1	5228	4330	124
IL13	105	40	70	0	0	0	529	463	217
SPARC	105	5	4	1	0	0	530	1985	1734
SNAI2	105	0	1	0	0	0	531	5315	2982
OSM	104	16	28	0	0	0	532	919	455
WWOX	104	1	8	0	0	0	533	3657	1141
WISP2	104	1	0	0	0	0	534	3658	4645
RARS	103	169	10	0	0	0	535	130	968
TNFRSF1A	103	51	54	0	0	0	536	384	282
FADD	103	37	80	0	0	0	537	488	188
HSPD1	103	18	40	0	0	0	538	845	345
CHGA	103	4	6	0	0	0	539	2218	1398
VCAN	102	4	5	1	0	0	540	2219	1549
FIGF	102	4	3	0	0	0	541	2220	1967
MAPK14	629	159	128	0	1	0	102	135	115
SMARCA4	101	33	17	0	0	0	543	531	676
LCN2	101	9	3	0	0	0	544	1394	1968
XBP1	101	4	57	0	0	0	545	2221	267
STAR	101	1	0	0	0	0	546	3659	4646
KRAS	440	151	44	0	1	0	130	144	325
EDN1	100	14	1	0	0	0	548	1026	2983
HNMT	100	11	1	1	0	0	549	1218	2984
MSN	100	5	8	0	0	0	550	1986	1142
IGFBP4	100	2	0	0	0	0	551	2970	4647
GREB1	100	0	0	0	0	0	552	5316	4648
NCOR1	130	150	18	0	1	0	449	146	644
HK1	99	27	14	0	0	0	554	621	773
BMP2	99	12	9	0	0	0	555	1152	1041
CYP27B1	99	4	5	0	0	0	556	2222	1550
TJP1	99	1	0	0	0	0	557	3660	4649
MLLT10	0	127	5	0	1	0	9269	167	1699
TSPO	98	26	11	0	0	0	559	643	902
NFKBIA	98	22	50	0	0	0	560	732	294
PPARA	98	21	14	0	0	0	561	756	774
NAT2	98	7	2	0	0	0	562	1660	2307
SP100	8	122	12	0	1	0	3334	172	879
CXCL10	97	40	95	1	0	0	564	464	155
ROCK1	97	6	5	0	0	0	565	1812	1551
KAT6A	2	119	0	0	1	0	5732	177	7058
HOXA10	20	115	3	0	1	0	1910	184	2063
CARM1	96	2	0	0	0	0	568	2971	4650
KRT72	96	0	0	0	0	0	569	5317	4651
PRTN3	95	82	22	0	0	0	570	239	545
SPN	40	104	301	0	1	0	1154	203	54
TG	94	29	22	0	0	0	572	582	546
RET	94	26	8	0	0	0	573	644	1143
ATF2	94	15	18	0	0	0	574	971	646
USP9X	94	14	16	0	0	0	575	1027	707
TTR	94	5	14	0	0	0	576	1987	775
NRIP1	94	4	1	1	0	0	577	2223	2985
CBL	54	97	63	0	1	0	911	215	240
SPIC	94	4	8	0	0	0	579	2225	1144
NANOG	94	4	3	0	0	0	580	2226	1969
NPM1	93	890	381	0	0	0	581	19	41
KAT2B	93	42	8	0	0	0	582	445	1145
BACH1	93	34	6	0	0	0	583	514	1399
MED1	93	14	22	0	0	0	584	1028	548
GPX1	93	11	16	0	0	0	585	1219	708
LYVE1	93	4	6	0	0	0	586	2227	1400
TFAP2C	93	2	0	0	0	0	587	2972	4652
CDKN2B	92	221	68	0	0	0	588	98	223
ACE	92	16	14	0	0	0	589	920	776
RNASE1	91	49	37	0	0	0	590	398	364
TCL1A	16	19	108	0	0	1	2222	828	140
FGF4	91	1	11	0	0	0	592	3662	904
ATR	90	27	19	0	0	0	593	622	617
CXCL1	90	17	5	0	0	0	594	877	1552
HMGA2	90	16	8	1	0	0	595	921	1146
CD86	89	117	132	0	0	0	596	181	109
RBBP8	89	1	1	0	0	0	597	3663	2986
GNRHR	89	0	0	0	0	0	598	5318	4653
KRT17	89	0	0	0	0	0	599	5319	4654
FECH	19	92	77	0	1	0	1972	226	197
IL2RA	88	95	119	0	0	0	601	222	129
CD59	88	61	60	0	0	0	602	320	253
ERCC2	88	26	7	1	0	0	603	645	1262
ETV5	88	9	5	0	0	0	604	1395	1553
OXT	88	6	2	0	0	0	605	1813	2308
MUC2	88	2	3	0	0	0	606	2973	1970
BCAR3	88	0	1	0	0	0	607	5320	2987
CD83	87	79	29	0	0	0	608	248	443
SOD1	228	72	34	0	1	0	243	275	396
CTRL	87	14	13	0	0	0	610	1029	807
RBP1	87	14	3	0	0	0	611	1030	1971
CCNA1	31	71	1	0	1	0	1414	280	3085
LGALS1	87	9	27	0	0	0	613	1396	467
SLC9A3R1	87	0	0	0	0	0	614	5321	4655
LYZ	86	309	136	0	0	0	615	71	105
THY1	86	107	108	0	0	0	616	197	139
ABCC3	86	70	8	1	1	0	617	282	1147
JAK1	86	67	43	0	0	0	618	295	333
CXCR5	10	4	96	0	0	1	2992	2359	154
DDIT3	86	21	19	0	0	0	620	757	618
CBFA2T3	41	70	3	0	1	0	1133	283	1998
APEX1	86	20	19	0	0	0	622	792	619
CRYZ	86	19	3	0	0	0	623	815	1972
LRP1	86	6	6	0	0	0	624	1814	1401
FGF7	86	2	6	0	0	0	625	2974	1402
SSTR2	86	2	1	0	0	0	626	2975	2988
ELANE	85	181	13	0	0	0	627	122	808
F8	85	22	10	0	0	0	628	734	969
SLC9A1	85	18	14	0	0	0	629	846	777
ARID4B	85	13	0	0	0	0	630	1095	4656
F11R	85	7	2	1	0	0	631	1661	2309
RARB	236	68	8	0	1	0	234	290	1127
ZNF217	85	0	1	0	0	0	633	5322	2989
PDIK1L	84	27	15	0	0	0	634	623	743
PARP3	84	26	25	0	0	0	635	646	499
SMAD7	84	13	16	1	0	0	636	1096	709
E2F4	84	11	13	0	0	0	637	1220	809
GZMM	84	4	6	0	0	0	638	2228	1403
G6PD	83	43	13	0	0	0	639	438	810
DNMT3B	83	33	6	0	0	0	640	532	1404
PDPN	83	5	7	0	0	0	641	1988	1265
PPM1D	83	3	1	0	0	0	642	2537	2990
CXCR7	83	2	8	0	0	0	643	2976	1148
HSD11B2	83	1	0	0	0	0	644	3664	4657
MUC4	83	0	0	0	0	0	645	5323	4658
SELP	82	82	8	0	0	0	646	240	1149
GSN	82	17	2	0	0	0	647	878	2311
UGCG	82	9	2	1	0	0	648	1397	2312
HDAC3	81	50	25	0	0	0	649	390	500
GUSB	81	42	19	0	0	0	650	446	620
MYCN	81	39	61	0	0	0	651	473	249
LEF1	81	32	9	0	0	0	652	545	1042
CTLA4	81	31	52	0	0	0	653	556	285
CHUK	81	14	63	0	0	0	654	1031	239
VHL	81	5	10	0	0	0	655	1989	970
GZMB	80	79	114	0	0	0	656	249	131
MST1R	80	48	3	0	0	0	657	402	1973
SERPINE2	80	7	2	0	0	0	658	1662	2313
NAT1	80	5	3	1	0	0	659	1990	1974
CHKA	80	5	9	0	0	0	660	1991	1043
CST6	80	0	0	0	0	0	661	5324	4659
JUND	226	68	53	0	1	0	248	291	284
NR1I2	79	14	9	0	0	0	663	1032	1044
DCN	79	8	2	1	0	0	664	1508	2314
NDRG1	79	6	3	0	0	0	665	1816	1975
TOX3	79	0	0	1	0	0	666	5325	4660
HMOX1	78	66	26	0	0	0	667	301	483
TWSG1	78	32	12	0	0	0	668	546	851
PMAIP1	78	29	82	0	0	0	669	583	183
FYN	78	24	34	0	0	0	670	683	400
ELN	78	18	13	0	0	0	671	847	811
PTTG1	78	15	4	0	0	0	672	972	1736
PDCD4	78	15	4	0	0	0	673	973	1737
GPI	78	15	1	0	0	0	674	974	2991
XRCC5	78	10	22	0	0	0	675	1293	549
CTSL1	78	7	9	0	0	0	676	1663	1045
PTGER3	205	67	21	1	1	0	280	294	566
FGFR1	170	66	27	0	1	0	330	299	462
S100A7	78	0	0	0	0	0	679	5326	4662
SERPINC1	77	59	9	0	0	0	680	331	1046
ANXA2	77	48	5	0	0	0	681	403	1554
FTH1	77	35	4	0	0	0	682	510	1738
ERCC1	77	8	4	0	0	0	683	1509	1739
ITGB4	77	5	1	0	0	0	684	1992	2992
FSCN1	77	3	18	0	0	0	685	2539	647
NOTCH3	77	2	2	0	0	0	686	2977	2315
GRIP1	77	2	0	0	0	0	687	2978	4663
PGC	77	0	6	0	0	0	688	5327	1406
SIX1	77	0	0	0	0	0	689	5328	4664
TPO	76	203	15	0	0	0	690	108	744
IL17A	76	22	27	0	0	0	691	735	468
RPS6KA3	76	17	7	1	0	0	692	880	1266
CDH5	76	11	6	0	0	0	693	1221	1407
PTPN1	76	5	22	0	0	0	694	1993	550
PTCH1	76	4	8	1	0	0	695	2229	1150
TSG101	76	3	6	0	0	0	696	2540	1408
ADAM12	76	0	0	1	0	0	697	5329	4665
IFNB1	97	61	76	0	1	0	563	319	200
IGHG3	75	34	58	0	0	0	699	515	260
LMO4	75	5	2	0	0	0	700	1994	2316
BNIP3	75	4	17	0	0	0	701	2230	677
COPS5	75	4	10	0	0	0	702	2231	973
RHOH	75	3	54	0	0	0	703	2541	283
DLC1	75	2	14	0	0	0	704	2979	778
IGFBP7	74	26	7	1	0	0	705	647	1267
GSR	74	15	9	0	0	0	706	975	1047
TIMM8A	74	14	17	0	0	0	707	1033	678
AMH	74	4	2	0	0	0	708	2232	2317
CTAG1B	74	3	11	0	0	0	709	2542	906
CD151	74	3	1	0	0	0	710	2543	2993
SGK1	74	2	2	0	0	0	711	2980	2318
HBB	73	612	37	0	0	0	712	33	365
TOP1	101	60	11	0	1	0	542	328	901
CSF2RA	5	59	3	0	1	0	4169	332	2177
CDKN1C	73	24	25	0	0	0	715	684	501
CD63	73	24	12	0	0	0	716	685	852
SQSTM1	73	15	19	0	0	0	717	976	621
BMP7	73	3	2	0	0	0	718	2544	2319
WISP3	73	2	1	0	0	0	719	2981	2994
CTNND1	73	1	1	0	0	0	720	3666	2995
BTC	73	0	8	0	0	0	721	5330	1151
DIRAS3	73	0	5	0	0	0	722	5331	1555
ESRRA	73	0	0	0	0	0	723	5332	4666
WNT3A	72	11	4	0	0	0	724	1222	1740
PICALM	1	59	15	0	1	0	6839	333	758
POSTN	72	3	5	1	0	0	726	2545	1556
OXTR	72	1	0	0	0	0	727	3667	4667
TFF3	72	0	2	1	0	0	728	5333	2320
CD1A	71	66	48	0	0	0	729	302	304
RRM1	71	53	14	0	0	0	730	363	779
PRKCD	71	30	16	0	0	0	731	566	710
DAPK1	71	26	38	0	0	0	732	649	356
MAP2K6	71	16	7	0	0	0	733	922	1268
SULT4A1	71	9	4	0	0	0	734	1398	1741
PGGT1B	71	4	3	0	0	0	735	2233	1976
KISS1	71	0	0	0	0	0	736	5334	4668
CD40LG	70	58	431	0	0	0	737	335	35
NTRK1	70	46	13	0	0	0	738	423	812
CYLD	70	16	24	0	0	0	739	923	509
TXN	70	8	9	0	0	0	740	1510	1048
TGFB2	70	4	5	0	0	0	741	2234	1557
SCP2	70	0	0	0	0	0	742	5335	4669
CDK6	193	58	78	0	1	0	296	334	193
HMGB1	69	55	9	0	0	0	744	356	1049
NCOA2	118	56	3	0	1	0	485	346	1963
CYP2C9	69	4	1	0	0	0	746	2235	2996
CYP2C19	69	2	0	0	0	0	747	2982	4670
CTSK	69	1	6	1	0	0	748	3668	1409
CLDN1	69	0	2	0	0	0	749	5336	2321
APAF1	68	57	57	1	0	0	750	340	268
ANGPT2	68	29	12	0	0	0	751	585	853
BCL2L11	68	25	69	0	0	0	752	666	219
GFAP	68	5	26	0	0	0	753	1995	484
CYP3A5	68	5	1	0	0	0	754	1996	2997
GHR	68	1	3	0	0	0	755	3669	1977
MTDH	68	0	8	0	0	0	756	5337	1152
MDC1	68	0	7	0	0	0	757	5338	1269
GJB2	68	0	1	0	0	0	758	5339	2998
SUMO1	67	135	20	0	0	0	759	159	588
SELL	67	56	88	0	0	0	760	347	168
C3	67	41	88	1	0	0	761	453	169
EDNRB	67	31	16	0	0	0	762	557	711
ID1	67	21	3	0	0	0	763	758	1978
NR5A2	67	10	1	0	0	0	764	1294	2999
CANX	67	9	18	0	0	0	765	1399	648
NEDD9	67	3	10	0	0	0	766	2546	974
CD82	67	2	7	0	0	0	767	2983	1270
EIF2S1	66	39	19	0	0	0	768	474	622
ETS2	112	54	7	0	1	0	502	359	1260
BTG2	66	5	4	0	0	0	770	1997	1742
LASP1	66	3	0	0	0	0	771	2547	4671
CDH11	66	2	0	1	0	0	772	2984	4672
NOTCH4	66	1	2	0	0	0	773	3670	2322
BRAP	66	1	0	0	0	0	774	3671	4673
SFN	66	0	0	0	0	0	775	5340	4674
TMX1	66	0	0	0	0	0	776	5341	4675
CD69	65	41	57	0	0	0	777	454	269
EP300	65	33	23	0	0	0	778	533	529
IL24	65	14	1	0	0	0	779	1034	3000
YY1	64	52	17	0	1	0	786	371	680
LRP6	65	2	1	0	0	0	781	2985	3001
RDX	65	2	0	0	0	0	782	2986	4676
LIMK1	65	1	0	0	0	0	783	3672	4677
UIMC1	65	0	1	0	0	0	784	5342	3002
CALR	64	63	47	0	0	0	785	313	312
MBP	87	51	27	0	1	0	609	385	466
CCR5	64	28	41	0	0	0	787	604	340
FOLR2	64	28	0	0	0	0	788	605	4678
ALK	64	15	774	0	0	0	789	977	14
NUMA1	39	51	1	1	1	0	1177	386	3052
ABCC2	64	10	5	0	0	0	791	1295	1558
FURIN	64	9	10	0	0	0	792	1401	975
SDHB	64	7	4	1	0	0	793	1664	1743
MAP1LC3A	64	7	8	0	0	0	794	1665	1153
PYCR1	64	5	7	0	0	0	795	1998	1272
CHI3L1	64	1	8	0	0	0	796	3673	1154
CFLAR	96	47	60	0	1	0	566	411	252
HOXA7	2	47	3	0	1	0	5735	417	2220
B2M	63	37	73	0	0	0	799	489	209
HSF1	75	46	10	0	1	0	698	422	972
TOPBP1	63	8	0	0	0	0	801	1511	4679
PEBP1	63	7	19	0	0	0	802	1666	623
LMO2	10	46	63	0	1	0	2963	427	243
TYR	63	4	3	0	0	0	804	2236	1979
EIF2AK3	63	3	21	0	0	0	805	2548	574
ALCAM	63	3	7	0	0	0	806	2549	1273
TIAM1	63	3	1	0	0	0	807	2550	3003
RAD51C	63	1	2	0	0	0	808	3674	2324
HAS2	63	0	0	0	0	0	809	5343	4680
EPOR	62	378	11	0	0	0	810	56	908
FPR1	62	229	24	0	0	0	811	94	510
RPSA	62	75	16	0	0	0	812	259	712
ERG	21	43	3	0	1	0	1847	439	2058
NME2	62	24	8	0	0	0	814	686	1155
NR4A1	62	23	15	0	0	0	815	709	745
BID	62	20	40	0	0	0	816	793	346
BRAF	62	17	14	0	0	0	817	881	781
BAK1	62	15	60	0	0	0	818	978	254
CAST	62	11	12	0	0	0	819	1225	854
CYP2B6	62	4	0	1	0	0	820	2237	4681
RAC3	62	4	1	0	0	0	821	2238	3004
POU1F1	62	4	0	0	0	0	822	2239	4682
UGT1A1	62	1	0	0	0	0	823	3675	4683
RNF115	62	0	2	0	0	0	824	5344	2326
CD38	61	453	290	0	0	0	825	45	58
BMP4	61	24	11	0	0	0	826	687	909
TFDP1	61	16	16	0	0	0	827	924	713
BUB1B	61	14	4	0	0	0	828	1035	1744
HSPA1A	61	10	24	1	0	0	829	1296	511
FES	98	42	7	0	1	0	558	444	1261
CGA	61	3	4	0	0	0	831	2551	1745
JAK3	60	66	58	0	0	0	832	303	261
CASP1	60	42	50	0	0	0	833	447	295
EWSR1	20	42	15	0	1	0	1911	449	753
BBC3	60	21	88	0	0	0	835	759	170
TFAP2A	234	39	7	1	1	0	238	471	1251
WISP1	25	39	0	0	1	0	1646	479	4860
EGR3	60	7	9	1	0	0	838	1668	1051
ATF4	60	2	16	0	0	0	839	2987	714
PTN	60	1	3	0	0	0	840	3676	1980
EHHADH	60	1	0	0	0	0	841	3677	4684
CLDN4	60	0	1	1	0	0	842	5345	3006
HEATR6	60	0	0	0	0	0	843	5346	4685
PDGFB	59	58	13	0	0	0	844	336	813
LAMP1	59	56	33	0	0	0	845	348	409
IL1R1	59	30	22	0	0	0	846	567	551
ANXA1	59	24	15	0	0	0	847	688	746
REN	59	23	3	0	0	0	848	710	1981
TEK	113	37	4	0	1	0	499	487	1731
CSPG4	59	14	7	0	0	0	850	1037	1275
OGG1	59	9	3	1	0	0	851	1403	1982
MAPK7	59	5	2	0	0	0	852	1999	2328
CD79B	2	5	89	0	0	1	5796	2151	166
CEACAM21	59	4	4	0	0	0	854	2241	1746
CEACAM5	59	3	6	0	0	0	855	2552	1410
CASP2	53	37	26	0	1	0	928	490	485
ITK	59	0	3	0	0	0	857	5347	1983
TTF1	59	0	3	0	0	0	858	5348	1984
EBAG9	59	0	1	0	0	0	859	5349	3007
GGPS1	58	56	5	1	0	0	860	349	1559
THRA	58	48	5	1	0	0	861	404	1560
CXCL13	59	4	88	0	0	1	853	2240	171
ITGA5	58	45	19	0	0	0	863	431	625
IL18	60	36	36	0	1	0	834	497	373
IDO1	58	26	4	0	0	0	865	651	1747
CCK	58	18	12	0	0	0	866	848	855
KNG1	58	9	5	0	0	0	867	1404	1561
CD47	32	36	12	0	1	0	1384	501	862
KLK10	58	1	3	0	0	0	869	3678	1985
GDF15	58	1	3	0	0	0	870	3679	1986
TRH	58	1	2	0	0	0	871	3680	2331
F2RL1	58	1	0	0	0	0	872	3681	4688
DNMT3A	57	123	6	0	0	0	873	171	1411
ABO	57	79	13	0	0	0	874	250	814
KLF4	126	34	15	0	1	0	457	513	742
EXOG	57	14	9	1	0	0	876	1038	1052
CDC25B	57	9	10	1	0	0	877	1405	976
RIPK1	57	8	33	0	0	0	878	1512	410
CCL21	57	6	36	0	0	0	879	1822	374
MIF	57	6	16	0	0	0	880	1823	715
CEACAM19	57	4	4	0	0	0	881	2242	1748
CEACAM20	57	4	4	0	0	0	882	2243	1749
S100P	57	2	3	0	0	0	883	2989	1987
NRAS	56	279	35	0	0	0	884	80	390
TLR4	56	20	41	0	0	0	885	795	341
TAP2	56	16	98	0	0	0	886	926	150
EIF2AK2	56	16	49	0	0	0	887	927	299
HP	56	16	8	0	0	0	888	928	1156
ETV1	56	6	1	0	0	0	889	1824	3008
BCRP2	0	34	13	0	1	0	9272	526	836
MAPT	56	4	2	1	0	0	891	2244	2332
CDC123	56	3	10	0	0	0	892	2553	977
NRF1	56	2	0	0	0	0	893	2990	4689
DACH1	56	1	4	1	0	0	894	3682	1750
TBX2	56	0	0	0	0	0	895	5350	4690
SLIT2	56	0	0	0	0	0	896	5351	4691
IL15	55	66	76	0	0	0	897	304	202
DCC	55	20	5	0	0	0	898	796	1562
PLCG1	43	33	15	0	1	0	1101	534	749
CRABP2	55	11	1	1	0	0	900	1226	3010
RELB	91	19	76	0	0	1	591	814	201
DROSHA	55	9	10	0	0	0	902	1406	978
NRP2	55	2	1	1	0	0	903	2991	3011
GAST	55	2	21	0	0	0	904	2992	575
MAD2L1	55	2	4	0	0	0	905	2993	1751
TBX3	55	1	0	1	0	0	906	3683	4692
TAZ	55	1	1	0	0	0	907	3684	3012
ENAH	55	0	2	0	0	0	908	5352	2333
ANPEP	54	627	64	0	0	0	909	32	233
ITGB2	54	144	150	0	0	0	910	154	95
PTK2B	100	32	43	0	1	0	547	544	332
BLNK	6	7	73	0	0	1	3905	1753	212
AIFM1	54	48	31	0	0	0	913	405	429
NPY	54	38	5	0	0	0	914	481	1563
LDLR	54	35	14	0	0	0	915	511	782
SOCS3	54	32	11	0	0	0	916	547	910
PKIB	54	16	21	0	0	0	917	929	576
MAP2K2	54	14	9	0	0	0	918	1039	1053
HSPG2	54	6	10	0	0	0	919	1825	979
TXNIP	54	5	3	0	0	0	920	2001	1988
CUL1	54	4	9	0	0	0	921	2245	1054
SPHK2	54	2	4	1	0	0	922	2994	1752
EPAS1	54	2	7	0	0	0	923	2995	1276
SLC39A6	54	1	1	1	0	0	924	3685	3013
PSEN2	54	1	3	0	0	0	925	3686	1989
IGFALS	54	1	1	0	0	0	926	3687	3014
ZMYM2	5	32	10	0	1	0	4174	551	1014
HES1	73	29	17	0	1	0	713	584	679
CUX1	37	29	0	0	1	0	1228	589	4752
LAMP2	26	29	3	0	1	0	1612	591	2043
RIT1	53	21	95	0	0	0	931	761	156
CDK7	53	21	9	0	0	0	932	762	1056
MECP2	53	19	1	0	0	0	933	816	3016
NFE2L2	53	16	6	0	0	0	934	930	1413
DDR1	53	15	3	0	0	0	935	979	1990
CD46	53	13	35	1	0	0	936	1098	391
MAF	53	13	32	0	0	0	937	1099	422
PTGS1	53	13	5	0	0	0	938	1100	1564
CA2	26	28	0	0	1	0	1613	610	4848
CCNE2	53	9	2	0	0	0	940	1407	2335
AKR1C3	53	9	2	0	0	0	941	1408	2336
OPN1MW	53	8	19	0	0	0	942	1513	626
CDK9	24	28	8	0	1	0	1694	612	1184
BCAS2	53	4	2	0	0	0	944	2246	2337
PMS2	53	3	7	0	0	0	945	2554	1277
AXIN1	53	3	6	0	0	0	946	2555	1414
CBS	8	28	2	0	1	0	3337	616	2547
HOXB13	53	0	0	0	0	0	948	5353	4693
SRGN	5	28	2	0	1	0	4176	617	2618
ARHGEF2	52	17	13	0	0	0	950	882	815
ARG1	52	13	6	0	0	0	951	1101	1415
FLNA	52	13	6	0	0	0	952	1102	1416
LDHA	52	12	15	0	0	0	953	1153	747
CXCR3	52	8	48	0	0	0	954	1514	305
RPS6KA1	52	8	4	0	0	0	955	1515	1753
PTPN13	52	3	2	0	0	0	956	2556	2338
NKX2-1	52	2	8	0	0	0	957	2996	1158
IKBKB	99	27	65	0	1	0	553	620	231
UBR5	52	1	0	1	0	0	959	3690	4695
GRB2	293	72	68	0	0	1	188	273	221
SPINT1	52	0	1	1	0	0	961	5354	3018
CLDN7	52	0	2	0	0	0	962	5355	2339
PLEKHB1	52	0	1	0	0	0	963	5356	3019
GRPR	52	0	0	0	0	0	964	5357	4696
SCGB3A1	52	0	0	0	0	0	965	5358	4697
RUNX3	51	209	17	0	0	0	966	106	682
SIN3A	51	116	26	0	0	0	967	182	486
IL7	51	74	139	0	0	0	968	263	100
HMMR	51	57	4	0	0	0	969	341	1754
AURKB	51	35	20	0	0	0	970	512	589
HOXB7	51	14	4	0	0	0	971	1040	1755
TAC1	51	13	1	0	0	0	972	1103	3020
RCC1	51	9	13	0	0	0	973	1409	816
KEAP1	51	8	0	0	0	0	974	1516	4698
APOE	51	6	5	1	0	0	975	1826	1565
BDNF	51	6	48	0	0	0	976	1827	306
MCM2	51	3	10	0	0	0	977	2557	980
SGCG	51	3	6	0	0	0	978	2558	1417
MAP1LC3B	51	1	4	0	0	0	979	3692	1756
KLK4	51	1	0	0	0	0	980	3693	4699
CKAP4	51	0	4	0	0	0	981	5359	1757
SLC16A3	51	0	0	0	0	0	982	5360	4700
ANGPT1	58	27	2	0	1	0	864	624	2329
ALOX5	50	136	17	0	0	0	984	158	683
PTPN6	50	77	80	0	0	0	985	254	189
BCL6	50	58	1790	0	0	0	986	338	4
PPP2R2C	50	24	8	0	0	0	987	689	1159
CTSA	18	27	5	0	1	0	2047	628	1604
APOA1	50	11	0	0	0	0	989	1228	4701
IKBKE	50	9	27	0	0	0	990	1410	469
BAD	73	26	44	0	1	0	714	648	327
SIAH1	50	6	21	0	0	0	992	1828	577
FGF8	50	1	1	0	0	0	993	3694	3021
NGFR	49	41	43	0	0	0	994	455	334
IL1RN	49	36	19	0	0	0	995	498	627
GPR31	49	29	2	0	0	0	996	586	2340
GPT	49	25	25	0	0	0	997	667	502
XPO1	49	22	4	0	0	0	998	736	1758
RAG2	49	14	103	0	0	0	999	1041	147
PRKAR1A	49	14	17	0	0	0	1000	1042	684
DLX4	49	14	0	0	0	0	1001	1043	4702
NR3C2	49	12	10	0	0	0	1002	1154	981
MMP8	49	12	2	0	0	0	1003	1155	2341
SATB1	62	26	2	0	1	0	813	650	2325
ANG	49	9	12	0	0	0	1005	1412	856
PGK1	49	8	7	1	0	0	1006	1518	1279
CDH13	49	6	3	0	0	0	1007	1829	1993
KLF5	49	4	1	0	0	0	1008	2247	3023
DLD	49	3	1	0	0	0	1009	2559	3024
FABP3	49	2	0	0	0	0	1010	2997	4703
SLC10A1	49	2	0	0	0	0	1011	2998	4704
CXCR2	48	48	8	0	0	0	1012	406	1160
S100A9	48	46	4	0	0	0	1013	424	1759
UBE2I	48	29	0	0	0	0	1014	587	4705
HLA-DRB4	48	28	36	0	0	0	1015	606	375
REG1A	48	28	11	0	0	0	1016	607	911
SUZ12	48	21	7	0	0	0	1017	764	1280
RNF34	48	19	6	0	0	0	1018	817	1419
SYK	55	11	62	0	0	1	901	1227	246
SERPINA1	48	15	15	0	0	0	1020	980	748
EPHB4	48	10	0	0	0	0	1021	1298	4706
CD81	48	9	48	0	0	0	1022	1413	307
SMPD1	46	25	12	0	1	0	1057	668	857
HNRPDL	12	25	2	0	1	0	2658	673	2497
GLA	48	6	4	0	0	0	1025	1830	1760
SFRP2	48	6	0	0	0	0	1026	1831	4707
CSN1S1	48	2	5	0	0	0	1027	2999	1566
SAG	48	2	2	0	0	0	1028	3000	2343
NFATC1	34	12	56	0	0	1	1325	1159	275
OCLN	48	2	1	0	0	0	1030	3002	3027
LSP1	48	1	18	0	0	0	1031	3695	651
DOCK2	48	1	2	0	0	0	1032	3696	2344
ARF6	48	0	0	0	0	0	1033	5361	4708
NOV	48	0	0	0	0	0	1034	5362	4709
SLC16A4	48	0	0	0	0	0	1035	5363	4710
ITGAL	47	143	164	0	0	0	1036	155	90
GAB2	47	39	8	0	0	0	1037	475	1161
CYP2E1	47	28	4	0	0	0	1038	608	1761
TSKU	47	19	10	0	0	0	1039	818	983
TXNRD1	47	10	8	0	0	0	1040	1299	1162
PTPRA	10	25	1	0	1	0	2964	674	3364
FBXW7	47	7	4	0	0	0	1042	1670	1762
TAGLN	47	5	5	1	0	0	1043	2002	1567
XPC	47	5	1	0	0	0	1044	2003	3028
PRMT1	47	5	0	0	0	0	1045	2004	4711
FER	6	25	0	0	1	0	3880	675	5876
GPC3	47	1	2	0	0	0	1047	3698	2345
SHFM1	47	1	0	0	0	0	1048	3699	4713
DSG2	47	0	8	0	0	0	1049	5364	1163
AMPH	47	0	1	0	0	0	1050	5365	3029
EREG	47	0	0	0	0	0	1051	5366	4714
IGHE	46	517	193	0	0	0	1052	39	81
CD36	46	104	11	0	0	0	1053	202	912
SPNS1	46	41	40	0	0	0	1054	456	347
LTA	46	34	44	0	0	0	1055	516	328
PLP1	46	27	2	0	0	0	1056	625	2346
TOP2B	27	24	11	0	1	0	1578	691	925
FOXO4	19	24	2	0	1	0	1974	695	2441
XDH	46	13	7	0	0	0	1059	1104	1282
RHOB	46	11	1	1	0	0	1060	1229	3030
HBEGF	46	4	1	0	0	0	1061	2248	3031
CYP51A1	46	3	3	0	0	0	1062	2560	1994
RRS1	46	3	2	0	0	0	1063	2561	2347
AFF1	2	24	3	0	1	0	5747	699	2224
BMP6	46	1	14	0	0	0	1065	3701	783
SAT1	46	1	1	0	0	0	1066	3702	3032
FUS	45	87	34	0	0	0	1067	229	401
IL6ST	45	40	41	1	0	0	1068	465	342
S100A8	45	39	5	0	0	0	1069	476	1568
AMBP	45	34	3	0	0	0	1070	517	1995
ITGA2	45	26	7	0	0	0	1071	652	1283
PRDX1	45	18	1	0	0	0	1072	850	3033
UBA7	0	24	0	0	1	0	9278	701	9892
MLANA	45	9	5	0	0	0	1074	1415	1569
JUP	45	3	0	0	0	0	1075	2562	4715
RAD52	45	2	1	1	0	0	1076	3003	3034
EPB49	45	2	1	0	0	0	1077	3004	3035
LPAR1	45	1	0	0	0	0	1078	3703	4716
MMP9	1350	128	48	0	0	1	32	164	301
NCOA6	45	0	1	0	0	0	1080	5368	3036
GIPC1	45	0	0	0	0	0	1081	5369	4717
LPO	44	54	19	0	0	0	1082	360	628
FGFR3	44	24	31	0	0	0	1083	690	430
HOXA1	44	17	1	0	0	0	1084	884	3037
PCBP2	53	23	9	0	1	0	929	711	1055
MSX2	44	10	0	0	0	0	1086	1300	4718
SERPINA3	44	9	7	1	0	0	1087	1416	1285
TLR9	44	9	46	0	0	0	1088	1417	315
AGT	44	8	9	0	0	0	1089	1521	1058
MAGEA3	44	8	9	0	0	0	1090	1522	1059
FKBP4	44	3	1	0	0	0	1091	2563	3038
GMNN	44	1	10	0	0	0	1092	3704	985
SPTBN4	44	1	1	0	0	0	1093	3705	3039
CYP11A1	44	1	0	0	0	0	1094	3706	4719
FOLH1	44	0	11	0	0	0	1095	5370	913
RLN2	44	0	1	0	0	0	1096	5371	3040
DAG1	44	0	0	0	0	0	1097	5372	4720
NR2F1	44	0	0	0	0	0	1098	5373	4721
TACC1	44	0	0	0	0	0	1099	5374	4722
CD55	43	34	60	0	0	0	1100	518	255
SRF	34	23	7	0	1	0	1321	716	1294
RHOJ	43	21	73	0	0	0	1102	765	210
TRAF2	43	10	101	0	0	0	1103	1301	148
SSB	43	9	19	0	0	0	1104	1418	629
E2F3	43	6	8	0	0	0	1105	1832	1164
NOS1	96	22	11	0	1	0	567	733	903
TNK1	43	3	9	0	0	0	1107	2565	1060
ADAM10	43	3	4	0	0	0	1108	2566	1763
SSTR1	43	2	3	1	0	0	1109	3005	1996
SULF1	43	2	0	1	0	0	1110	3006	4724
IGFBP6	43	2	0	0	0	0	1111	3007	4725
EFNA1	43	0	0	1	0	0	1112	5375	4726
ADAMTS1	43	0	2	0	0	0	1113	5376	2350
TIMP4	43	0	0	0	0	0	1114	5377	4727
FLT3LG	42	188	20	0	0	0	1115	120	590
DMP1	42	50	6	0	0	0	1116	391	1420
TGM1	42	46	11	0	0	0	1117	425	914
NTRK3	42	33	6	0	0	0	1118	535	1421
MYLK	42	20	3	0	0	0	1119	797	1997
FRZB	42	13	1	0	0	0	1120	1105	3041
IKBKG	42	8	48	0	0	0	1121	1523	308
YWHAZ	42	8	2	0	0	0	1122	1524	2351
RALGDS	15	22	14	0	1	0	2332	741	791
LARP6	42	7	5	0	0	0	1124	1672	1570
CNKSR1	42	4	0	1	0	0	1125	2249	4728
SULF2	42	4	0	0	0	0	1126	2250	4729
CXCL11	42	3	6	1	0	0	1127	2567	1422
COL1A2	42	3	5	1	0	0	1128	2568	1571
CLCA2	42	2	0	0	0	0	1129	3008	4730
ATF3	42	0	6	0	0	0	1130	5378	1423
CRH	42	0	2	0	0	0	1131	5379	2352
CUL3	42	0	0	0	0	0	1132	5380	4731
CALCOCO2	2	22	1	0	1	0	5749	750	3830
TRERF1	41	29	22	0	0	0	1134	588	552
CEBPD	41	28	7	0	0	0	1135	609	1286
ISG15	41	21	19	0	0	0	1136	766	631
CRTC2	41	20	20	0	0	0	1137	798	591
CASP10	41	19	11	0	0	0	1138	819	915
MICA	41	18	15	0	0	0	1139	851	750
SLC12A2	41	17	1	0	0	0	1140	885	3042
MBD2	53	21	1	0	1	0	930	760	3015
RARG	41	13	1	0	0	0	1142	1106	3043
MAP3K5	41	8	17	0	0	0	1143	1525	685
NR2F2	41	3	0	0	0	0	1144	2569	4732
NPS	41	2	1	0	0	0	1145	3009	3044
TGFB3	41	1	1	1	0	0	1146	3707	3045
PPARGC1A	41	1	2	0	0	0	1147	3708	2354
DAB2	41	1	0	0	0	0	1148	3709	4733
WASL	41	1	0	0	0	0	1149	3710	4734
AGR2	41	0	0	1	0	0	1150	5381	4735
SEMA3B	41	0	1	0	0	0	1151	5382	3046
NR0B1	41	0	0	0	0	0	1152	5383	4736
RUNX1T1	40	1248	65	1	0	0	1153	12	232
HOXA5	52	21	1	0	1	0	949	763	3017
HMBS	40	101	14	0	0	0	1155	208	784
GFRA2	40	26	12	0	0	0	1156	653	858
KAT6B	7	21	0	1	1	0	3574	776	5713
CD70	8	3	43	0	0	1	3382	2715	335
GSK3A	40	12	6	0	0	0	1159	1156	1424
CXADR	40	9	11	0	0	0	1160	1419	916
UBE2B	40	9	11	0	0	0	1161	1420	917
PER2	40	8	2	1	0	0	1162	1526	2355
TSC1	40	8	7	0	0	0	1163	1527	1287
HDAC6	86	20	11	0	1	0	621	791	905
AGTR1	40	4	2	1	0	0	1165	2251	2356
HBM	40	4	0	0	0	0	1166	2252	4738
LIN28A	40	3	1	0	0	0	1167	2570	3048
PPIB	40	2	1	0	0	0	1168	3010	3049
TRPC6	40	1	0	0	0	0	1169	3711	4739
FAP	40	0	1	1	0	0	1170	5384	3050
SOX9	40	0	4	0	0	0	1171	5385	1764
CRYAB	40	0	1	0	0	0	1172	5386	3051
FOXC1	40	0	0	0	0	0	1173	5387	4740
KLK2	40	0	0	0	0	0	1174	5388	4741
BANP	40	0	0	0	0	0	1175	5389	4742
KLK14	40	0	0	0	0	0	1176	5390	4743
PLEK	57	20	18	0	1	0	875	794	650
ANK2	39	23	16	0	0	0	1178	712	716
F10	39	23	8	0	0	0	1179	713	1166
FST	39	23	2	0	0	0	1180	714	2357
TNFRSF10C	39	13	6	0	0	0	1181	1107	1425
HFE	29	20	9	0	1	0	1491	800	1069
RPTOR	39	9	7	0	0	0	1183	1422	1288
RBPJ	39	8	56	0	0	0	1184	1528	274
CTNNA1	111	19	0	0	1	0	509	813	4643
WNT10B	39	4	3	0	0	0	1186	2253	2000
CD72	1	3	42	0	0	1	6982	2874	336
POU2AF1	0	5	40	0	0	1	9379	2180	349
KDM5B	39	3	2	1	0	0	1189	2571	2358
PCGF2	39	3	0	0	0	0	1190	2572	4744
EGLN1	39	2	1	0	0	0	1191	3011	3056
AKT3	39	0	9	0	0	0	1192	5391	1061
TGM7	39	0	1	0	0	0	1193	5392	3057
UGT2B7	39	0	0	0	0	0	1194	5393	4745
PRSS50	39	0	0	0	0	0	1195	5394	4746
RNASE2	10	19	0	0	1	0	2967	829	5391
IL5	38	189	121	0	0	0	1197	118	126
THPO	38	182	9	0	0	0	1198	121	1062
ADA	38	81	34	0	0	0	1199	242	402
CDX2	38	56	3	0	0	0	1200	350	2001
IRF8	3	66	37	0	0	1	5068	305	366
PPBP	38	46	6	0	0	0	1202	426	1426
SLC40A1	38	39	23	0	0	0	1203	477	531
IL6R	38	33	49	0	0	0	1204	536	300
ACTG1	38	16	8	0	0	0	1205	931	1167
MB	38	16	8	0	0	0	1206	932	1168
CD320	38	16	7	0	0	0	1207	933	1289
EIF4G1	38	14	9	0	0	0	1208	1047	1063
P4HB	38	12	4	0	0	0	1209	1157	1765
RPL22	5	19	34	0	1	0	4179	831	405
ADM	38	10	0	0	0	0	1211	1302	4747
LMNB1	38	7	6	0	0	0	1212	1674	1427
ATG7	38	7	5	0	0	0	1213	1675	1572
RRM2	38	6	2	0	0	0	1214	1833	2359
ABCC11	38	5	0	0	0	0	1215	2006	4748
MATK	38	4	3	0	0	0	1216	2256	2002
LRIG1	38	2	1	1	0	0	1217	3012	3058
KLK3	38	2	2	0	0	0	1218	3013	2360
EGLN2	38	1	0	1	0	0	1219	3712	4749
BCAS3	38	1	0	0	0	0	1220	3713	4750
WWP1	38	0	3	1	0	0	1221	5395	2003
LGALS3BP	38	0	2	1	0	0	1222	5396	2361
BRCC3	38	0	1	0	0	0	1223	5397	3059
POU4F2	38	0	0	0	0	0	1224	5398	4751
CTSG	37	69	3	0	0	0	1225	285	2004
SAA1	37	52	7	0	0	0	1226	372	1290
PDGFRA	37	30	8	0	0	0	1227	568	1169
NT5C2	0	19	0	0	1	0	9281	837	9895
CD99	37	21	40	0	0	0	1229	767	348
MTHFD1	37	17	7	0	0	0	1230	886	1291
PTER	37	15	15	1	0	0	1231	984	751
STAT6	37	15	104	0	0	0	1232	985	144
MSH3	37	15	5	0	0	0	1233	986	1573
UCHL1	37	14	136	0	0	0	1234	1048	106
AVP	37	10	16	0	0	0	1235	1303	718
KDM1A	37	10	1	0	0	0	1236	1304	3060
PRDX6	37	8	3	0	0	0	1237	1529	2005
PDLIM7	37	7	1005	0	0	0	1238	1676	9
THEMIS	37	7	12	0	0	0	1239	1677	859
ARID4A	35	18	8	0	1	0	1301	852	1173
MTR	37	6	10	0	0	0	1241	1835	986
CPE	37	6	8	0	0	0	1242	1836	1170
HBP1	37	5	0	0	0	0	1243	2007	4753
SDC2	37	4	9	0	0	0	1244	2257	1064
PRIMA1	37	3	3	0	0	0	1245	2573	2006
POR	37	3	1	0	0	0	1246	2574	3061
RTKN	37	3	0	0	0	0	1247	2575	4754
DDX5	37	2	1	0	0	0	1248	3014	3062
CRK	37	1	5	0	0	0	1249	3714	1575
CGB5	37	1	3	0	0	0	1250	3715	2007
GATA4	37	1	2	0	0	0	1251	3716	2362
CASR	37	1	1	0	0	0	1252	3717	3063
ARHGAP35	37	1	1	0	0	0	1253	3718	3064
PYCARD	37	1	0	0	0	0	1254	3719	4755
SLC16A1	37	0	6	1	0	0	1255	5399	1428
COL3A1	37	0	4	1	0	0	1256	5400	1766
CLDN3	37	0	0	1	0	0	1257	5401	4756
AXIN2	37	0	1	0	0	0	1258	5402	3065
KLK5	37	0	0	0	0	0	1259	5403	4757
FCGR1A	36	119	51	0	0	0	1260	176	289
ALOX12	36	48	2	0	0	0	1261	407	2363
TARP	36	25	104	0	0	0	1262	669	145
ENTPD1	2	1	37	0	0	1	5942	4455	367
PTPRF	36	21	3	0	0	0	1264	768	2008
HSPA9	36	17	14	0	0	0	1265	887	785
USF1	36	16	0	0	0	0	1266	934	4758
KSR1	36	12	2	1	0	0	1267	1158	2364
SKP1	36	10	8	0	0	0	1268	1305	1171
NR0B2	36	10	6	0	0	0	1269	1306	1429
TNFRSF10D	36	8	7	0	0	0	1270	1530	1292
GPX3	36	7	4	0	0	0	1271	1678	1767
MEN1	36	7	4	0	0	0	1272	1679	1768
CDCP1	36	7	0	0	0	0	1273	1680	4759
PCNT	36	6	8	0	0	0	1274	1837	1172
FEN1	36	6	5	0	0	0	1275	1838	1576
SLC25A16	36	4	10	0	0	0	1276	2258	987
TP53INP2	36	4	7	0	0	0	1277	2259	1293
CDC6	36	4	3	0	0	0	1278	2260	2009
HPGD	36	4	1	0	0	0	1279	2261	3066
AKT2	185	17	24	0	1	0	307	871	505
KLK6	36	3	9	0	0	0	1281	2577	1065
PORCN	36	3	4	0	0	0	1282	2578	1769
KLF10	36	3	2	0	0	0	1283	2579	2365
CUL4A	36	3	0	0	0	0	1284	2580	4760
SREBF1	36	2	2	1	0	0	1285	3015	2366
MACROD1	36	2	1	0	0	0	1286	3016	3067
CASP6	79	17	10	0	1	0	662	879	971
FABP7	36	1	1	1	0	0	1288	3721	3068
TRAF4	36	1	4	0	0	0	1289	3722	1770
IL17RB	36	1	1	0	0	0	1290	3723	3069
PEA15	36	1	0	0	0	0	1291	3724	4762
RFC1	36	0	3	0	0	0	1292	5404	2011
RAD51B	36	0	1	0	0	0	1293	5405	3070
COBRA1	36	0	1	0	0	0	1294	5406	3071
GNRH2	36	0	0	0	0	0	1295	5407	4763
LHCGR	36	0	0	0	0	0	1296	5408	4764
PTH1R	36	0	0	0	0	0	1297	5409	4765
TNFRSF8	35	41	994	0	0	0	1298	457	10
B3GAT1	35	36	74	0	0	0	1299	499	204
ABCB4	35	19	3	0	0	0	1300	820	2012
PRKAR2A	50	17	6	0	1	0	988	883	1418
BCL3	35	16	127	1	0	0	1302	935	117
GHRL	35	14	12	0	0	0	1303	1049	860
HNF1A	35	11	13	1	0	0	1304	1231	817
MYH9	35	9	1	0	0	0	1305	1423	3072
DNAJB1	35	7	11	0	0	0	1306	1681	919
RAD21	35	5	4	0	0	0	1307	2008	1771
UBE2D1	35	4	4	0	0	0	1308	2262	1772
PURA	11	17	1	0	1	0	2800	898	3326
BNIP3L	35	3	1	0	0	0	1310	2582	3074
S100A1	35	3	0	0	0	0	1311	2583	4766
EPS15	9	17	2	0	1	0	3147	900	2536
NODAL	35	2	6	0	0	0	1313	3018	1430
NR1H4	35	2	0	0	0	0	1314	3019	4767
C11ORF30	35	1	0	0	0	0	1315	3725	4768
FBLN1	35	0	0	1	0	0	1316	5410	4769
NEK2	35	0	3	0	0	0	1317	5411	2013
ASAP1	35	0	1	0	0	0	1318	5412	3075
TBXAS1	7	17	0	0	1	0	3576	902	5714
CHM	34	27	26	0	0	0	1320	626	487
MZF1	6	17	1	0	1	0	3884	904	3516
SLC5A7	34	20	13	1	0	0	1322	799	818
HLA-G	34	19	16	0	0	0	1323	821	719
HIC1	34	15	15	0	0	0	1324	987	752
TCF3	15	40	36	0	0	1	2328	468	379
MTAP	34	11	5	1	0	0	1326	1232	1577
ENPEP	34	11	6	0	0	0	1327	1233	1431
UBE2T	34	11	6	0	0	0	1328	1234	1432
PLD2	59	16	0	0	1	0	849	925	4686
CBR1	34	10	0	0	0	0	1330	1308	4771
HOXB3	5	16	1	0	1	0	4180	948	3570
GGT1	34	9	2	0	0	0	1332	1425	2367
DPP4	34	8	28	0	0	0	1333	1531	456
NFATC2	34	8	19	0	0	0	1334	1532	632
RBP2	34	8	0	0	0	0	1335	1533	4772
SMARCA2	45	15	7	0	1	0	1073	981	1284
ACPP	34	5	12	0	0	0	1337	2009	861
GAB1	44	15	10	0	1	0	1085	982	984
RBBP7	34	4	2	0	0	0	1339	2264	2370
ZFP36	34	4	1	0	0	0	1340	2265	3076
SDC4	34	3	7	0	0	0	1341	2584	1295
CDC20	34	3	2	0	0	0	1342	2585	2371
MMP10	34	2	6	0	0	0	1343	3020	1433
WRN	34	2	3	0	0	0	1344	3021	2015
SLC25A6	34	1	0	0	0	0	1345	3726	4773
UPP1	34	0	0	1	0	0	1346	5413	4774
ELAVL1	34	0	2	0	0	0	1347	5414	2372
ECE1	34	0	1	0	0	0	1348	5415	3077
ROBO1	34	0	0	0	0	0	1349	5416	4775
UGT2B15	34	0	0	0	0	0	1350	5417	4776
RDH16	34	0	0	0	0	0	1351	5418	4777
ITGA2B	33	321	18	0	0	0	1352	67	652
HOXD13	33	36	5	0	0	0	1353	500	1578
TNFRSF1B	33	34	20	0	0	0	1354	519	592
MYBL2	33	23	8	0	0	0	1355	717	1174
IER3	33	22	1	0	0	0	1356	737	3078
IL4R	33	21	39	0	0	0	1357	769	353
BHLHE22	33	18	5	0	0	0	1358	853	1579
PRNP	33	16	6	0	0	0	1359	936	1434
CDC37	33	15	2	0	0	0	1360	988	2373
CXCL9	58	47	35	0	0	1	862	412	389
RASA1	33	12	6	0	0	0	1362	1160	1435
USF2	41	15	2	0	1	0	1141	983	2353
AKR1A1	33	11	9	0	0	0	1364	1236	1067
UCHL3	33	7	5	0	0	0	1365	1682	1580
SREBF2	33	6	4	1	0	0	1366	1840	1773
MCM7	33	5	7	0	0	0	1367	2010	1296
WNT3	33	3	4	0	0	0	1368	2586	1774
CCNG2	33	2	1	1	0	0	1369	3022	3079
ATP2C1	33	2	1	0	0	0	1370	3023	3080
CYP2C8	33	2	0	0	0	0	1371	3024	4779
TXNL1	33	2	0	0	0	0	1372	3025	4780
ELF1	31	15	11	0	1	0	1418	989	922
XRCC4	33	1	7	0	0	0	1374	3728	1297
EIF2C2	33	1	3	0	0	0	1375	3729	2017
LUM	33	0	2	1	0	0	1376	5419	2375
STC2	33	0	0	1	0	0	1377	5420	4781
GPNMB	33	0	0	1	0	0	1378	5421	4782
LIG4	33	0	11	0	0	0	1379	5422	920
GOLGA2	33	0	3	0	0	0	1380	5423	2018
NTS	33	0	2	0	0	0	1381	5424	2376
TUBB3	33	0	2	0	0	0	1382	5425	2377
MUCL1	33	0	0	0	0	0	1383	5426	4783
HHEX	16	15	0	0	1	0	2225	997	5066
FANCG	32	19	0	0	0	0	1385	822	4784
CCL3	32	17	29	0	0	0	1386	888	444
MLYCD	32	11	139	0	0	0	1387	1237	101
GRHL3	32	9	8	0	0	0	1388	1426	1175
F7	32	8	0	0	0	0	1389	1534	4785
MGEA5	60	14	7	0	1	0	836	1036	1274
POLB	32	7	4	0	0	0	1391	1684	1775
FABP5	32	7	3	0	0	0	1392	1685	2020
DSP	32	6	6	0	0	0	1393	1841	1436
COX6B1	46	14	9	0	1	0	1058	1044	1057
CSNK2A1	32	5	4	0	0	0	1395	2012	1776
PDK1	32	4	13	0	0	0	1396	2266	819
PTGER4	32	4	9	0	0	0	1397	2267	1068
PAX2	32	4	1	0	0	0	1398	2268	3081
TCIRG1	32	3	4	0	0	0	1399	2587	1777
MAP2K3	40	14	8	0	1	0	1157	1045	1165
UHRF1	32	2	3	0	0	0	1401	3027	2021
RLN1	32	2	1	0	0	0	1402	3028	3082
FOXC2	32	2	0	0	0	0	1403	3029	4786
TRIM25	32	1	0	1	0	0	1404	3730	4787
HK2	32	1	11	0	0	0	1405	3731	921
SERPINF1	32	0	1	1	0	0	1406	5427	3083
MTA3	32	0	18	0	0	0	1407	5428	653
CASC3	32	0	1	0	0	0	1408	5429	3084
FGF10	32	0	0	0	0	0	1409	5430	4788
TDGF1	32	0	0	0	0	0	1410	5431	4789
RECK	32	0	0	0	0	0	1411	5432	4790
MCPH1	32	0	0	0	0	0	1412	5433	4791
PGRMC1	32	0	0	0	0	0	1413	5434	4792
PDGFA	40	14	0	0	1	0	1158	1046	4737
KLRK1	31	64	26	0	0	0	1415	308	488
IFNA2	31	31	61	0	0	0	1416	558	250
FHL2	31	19	1	0	0	0	1417	823	3086
FCGR2B	25	14	209	0	1	0	1650	1054	77
WAS	31	13	18	0	0	0	1419	1108	654
TRIM24	24	14	0	0	1	0	1700	1055	4871
PPP2CA	31	12	6	0	0	0	1421	1162	1437
TERF2	31	12	4	0	0	0	1422	1163	1778
SHH	31	10	7	0	0	0	1423	1309	1298
NT5E	31	10	5	0	0	0	1424	1310	1581
SP3	31	9	1	0	0	0	1425	1427	3087
PTGER1	31	7	2	1	0	0	1426	1686	2380
TRADD	31	6	36	0	0	0	1427	1842	376
TNFRSF14	31	5	8	0	0	0	1428	2013	1176
HEY1	31	5	4	0	0	0	1429	2014	1779
GPX4	31	5	2	0	0	0	1430	2015	2381
TLR3	31	4	21	0	0	0	1431	2269	578
MRC2	31	4	4	0	0	0	1432	2270	1780
WIF1	31	4	2	0	0	0	1433	2271	2382
ELK3	31	4	1	0	0	0	1434	2272	3088
S100A6	31	4	0	0	0	0	1435	2273	4793
LSS	31	2	6	0	0	0	1436	3030	1438
SSR1	31	2	6	0	0	0	1437	3031	1439
ST3GAL1	31	2	0	0	0	0	1438	3032	4794
AKR1C1	31	1	3	0	0	0	1439	3732	2022
L1CAM	31	1	1	0	0	0	1440	3733	3089
HOXD10	31	1	0	0	0	0	1441	3734	4795
PAEP	31	1	0	0	0	0	1442	3735	4796
SCRIB	31	1	0	0	0	0	1443	3736	4797
RNF41	31	1	0	0	0	0	1444	3737	4798
MMP26	31	0	0	1	0	0	1445	5435	4799
DMBT1	31	0	20	0	0	0	1446	5436	593
RPL13A	31	0	8	0	0	0	1447	5437	1177
STC1	31	0	0	0	0	0	1448	5438	4800
RHOBTB2	31	0	0	0	0	0	1449	5439	4801
DNAJA3	31	0	0	0	0	0	1450	5440	4802
CDA	30	80	10	0	0	0	1451	244	988
SF3B1	7	14	1	0	1	0	3579	1071	3470
ABCA4	30	13	2	0	0	0	1453	1110	2383
AXL	30	9	1	0	0	0	1454	1428	3090
BCL11A	2	16	33	0	0	1	5754	955	416
COX5A	30	7	3	0	0	0	1456	1687	2023
TRAPPC4	6	14	1	0	1	0	3890	1073	3517
KDM6A	5	14	3	0	1	0	4185	1076	2178
TH	30	6	2	0	0	0	1459	1845	2384
MTA2	30	6	2	0	0	0	1460	1846	2385
ICOSLG	55	13	6	0	1	0	899	1097	1412
LPL	30	5	2	0	0	0	1462	2017	2386
CFL1	30	4	3	0	0	0	1463	2274	2025
ZAK	30	4	1	0	0	0	1464	2275	3092
NFIC	30	3	2	0	0	0	1465	2588	2387
HNRNPA1	30	13	4	0	1	0	1452	1109	1781
PMEL	30	2	6	0	0	0	1467	3034	1440
PI3	30	2	1	0	0	0	1468	3035	3094
RPS14	19	13	0	1	1	0	1978	1118	4964
NPHS1	30	1	2	0	0	0	1470	3739	2388
PSPC1	30	1	1	0	0	0	1471	3740	3095
AHSG	30	1	0	0	0	0	1472	3741	4803
CIB1	30	1	0	0	0	0	1473	3742	4804
PPP5C	30	0	1	1	0	0	1474	5441	3096
NDE1	30	0	4	0	0	0	1475	5442	1782
KLK1	30	0	1	0	0	0	1476	5443	3097
RPL19	30	0	1	0	0	0	1477	5444	3098
ARRB2	30	0	0	0	0	0	1478	5445	4805
ARHGAP5	30	0	0	0	0	0	1479	5446	4806
HYAL1	30	0	0	0	0	0	1480	5447	4807
KISS1R	30	0	0	0	0	0	1481	5448	4808
PPP1R1B	30	0	0	0	0	0	1482	5449	4809
NAA10	30	0	0	0	0	0	1483	5450	4810
CITED2	30	0	0	0	0	0	1484	5451	4811
HUNK	30	0	0	0	0	0	1485	5452	4812
SMC3	9	13	1	0	1	0	3150	1130	3398
WT1	29	73	2	0	0	0	1487	271	2389
HLA-B	29	72	30	0	0	0	1488	276	439
TYK2	29	40	17	0	0	0	1489	466	686
CRABP1	29	33	2	0	0	0	1490	537	2390
PBX3	0	13	0	0	1	0	9296	1146	9902
KCNH1	29	19	1	0	0	0	1492	824	3099
HMGB1P5	29	16	1	0	0	0	1493	937	3100
ATF1	29	14	6	0	0	0	1494	1051	1442
PCSK7	29	13	11	0	0	0	1495	1111	923
S100B	29	13	2	0	0	0	1496	1112	2391
LILRB1	29	12	2	0	0	0	1497	1164	2392
NCKAP1L	29	11	9	0	0	0	1498	1238	1070
GTDC2	29	11	6	0	0	0	1499	1239	1443
CP	29	10	1	0	0	0	1500	1311	3101
APOB	29	8	6	0	0	0	1501	1536	1444
SIAH2	29	8	1	0	0	0	1502	1537	3102
ABCC5	29	8	0	0	0	0	1503	1538	4813
NGLY1	29	7	16	0	0	0	1504	1688	720
NEO1	29	6	0	0	0	0	1505	1847	4814
MYD88	29	5	36	0	0	0	1506	2018	377
COL2A1	29	5	3	0	0	0	1507	2019	2026
HNRNPK	31	12	2	0	1	0	1420	1161	2379
PRKD1	29	3	7	1	0	0	1509	2589	1300
TRPS1	29	3	0	1	0	0	1510	2590	4815
PTPN22	29	2	2	1	0	0	1511	3036	2393
DHX9	29	2	1	0	0	0	1512	3037	3103
GSTA1	29	2	1	0	0	0	1513	3038	3104
ING1	29	1	7	0	0	0	1514	3743	1301
MUC6	29	1	1	0	0	0	1515	3744	3105
AKR1C2	29	1	0	0	0	0	1516	3745	4816
ANGPTL4	29	1	0	0	0	0	1517	3746	4817
VLDLR	29	1	0	0	0	0	1518	3747	4818
TTK	29	0	3	0	0	0	1519	5453	2027
SCD	29	0	2	0	0	0	1520	5454	2394
ERCC4	29	0	1	0	0	0	1521	5455	3106
STARD3	29	0	1	0	0	0	1522	5456	3107
ALDH3A1	29	0	0	0	0	0	1523	5457	4819
CAV2	29	0	0	0	0	0	1524	5458	4820
FAM126A	29	0	0	0	0	0	1525	5459	4821
ROCK2	29	0	0	0	0	0	1526	5460	4822
IL3RA	28	171	26	0	0	0	1527	126	489
MLLT1	28	124	12	0	0	0	1528	170	863
TTN	28	87	3	0	0	0	1529	230	2028
HBE1	28	55	3	0	0	0	1530	357	2029
SEPT9	28	39	0	0	0	0	1531	478	4823
TERT	220	51	32	0	0	1	259	381	421
TNFRSF9	28	29	45	0	0	0	1533	590	320
BLM	28	20	5	0	0	0	1534	801	1583
TFPI	28	19	0	0	0	0	1535	825	4824
PAX1	28	17	3	0	0	0	1536	889	2030
HEXIM1	28	17	0	0	0	0	1537	890	4825
MYOD1	28	15	4	0	0	0	1538	990	1783
KDM2B	28	14	3	0	0	0	1539	1052	2031
CFTR	28	12	9	0	0	0	1540	1165	1071
DYRK1A	6	12	0	0	1	0	3894	1191	5879
SOCS2	28	10	12	0	0	0	1542	1313	864
MSLN	28	9	1	0	0	0	1543	1429	3109
PGF	69	11	9	0	1	0	745	1223	1050
GCLC	28	7	9	0	0	0	1545	1689	1072
DCD	28	7	1	0	0	0	1546	1690	3110
CLTC	28	6	23	0	0	0	1547	1848	532
CKS1B	28	6	17	0	0	0	1548	1849	687
EPHX1	28	6	2	0	0	0	1549	1850	2395
SMO	64	11	14	0	1	0	790	1224	780
HNRNPA2B1	28	5	1	0	0	0	1551	2021	3111
AKR1C6P	28	5	0	0	0	0	1552	2022	4826
PIK3R1	38	11	16	0	1	0	1210	1230	717
ACTN4	28	4	3	0	0	0	1554	2278	2033
NPPA	28	3	2	0	0	0	1555	2591	2397
PKD1	28	2	0	0	0	0	1556	3039	4827
TNK2	33	11	0	0	1	0	1363	1235	4778
BACH2	1	12	29	0	0	1	6860	1200	448
MUC5AC	28	1	4	0	0	0	1559	3750	1785
PA2G4	28	1	4	0	0	0	1560	3751	1786
STT3A	28	1	3	0	0	0	1561	3752	2034
EIF3E	28	1	2	0	0	0	1562	3753	2398
IGF2BP1	28	1	1	0	0	0	1563	3754	3112
TCHP	28	1	0	0	0	0	1564	3755	4828
TPD52	28	0	2	1	0	0	1565	5461	2399
PPT1	28	0	0	1	0	0	1566	5462	4829
SLC4A7	28	0	0	1	0	0	1567	5463	4830
GPX2	28	0	2	0	0	0	1568	5464	2400
HYAL2	28	0	1	0	0	0	1569	5465	3113
KCNJ3	28	0	0	0	0	0	1570	5466	4831
LOXL2	28	0	0	0	0	0	1571	5467	4832
S100A2	28	0	0	0	0	0	1572	5468	4833
ADAM15	28	0	0	0	0	0	1573	5469	4834
GPRC5A	28	0	0	0	0	0	1574	5470	4835
LYL1	0	11	7	0	1	0	9303	1275	1371
KITLG	27	162	3	0	0	0	1576	133	2036
CYP26A1	27	25	2	0	0	0	1577	670	2401
TSC2	87	10	7	0	1	0	612	1292	1263
RAP1A	27	23	10	0	0	0	1579	718	989
MAT1A	27	15	6	0	0	0	1580	991	1445
HPX	27	15	2	0	0	0	1581	992	2402
GCG	27	13	7	0	0	0	1582	1113	1302
GGH	27	12	5	0	0	0	1583	1166	1586
PABPC1	27	12	3	0	0	0	1584	1167	2037
PTS	27	10	4	0	0	0	1585	1314	1787
DICER1	53	10	17	0	1	0	939	1297	681
SMARCE1	27	7	0	0	0	0	1587	1692	4836
TRAF6	27	6	63	0	0	0	1588	1851	241
ORAI1	27	6	3	0	0	0	1589	1852	2038
WDR20	27	6	3	0	0	0	1590	1853	2039
MPG	27	6	1	0	0	0	1591	1854	3115
TNFSF14	27	5	4	0	0	0	1592	2023	1788
HM13	27	5	0	0	0	0	1593	2024	4837
ITGA3	27	3	3	0	0	0	1594	2592	2040
PODXL	27	3	1	0	0	0	1595	2593	3116
PPP4C	27	3	0	0	0	0	1596	2594	4838
CALCR	27	2	0	1	0	0	1597	3040	4839
ITIH4	27	2	3	0	0	0	1598	3041	2041
SIK1	27	2	3	0	0	0	1599	3042	2042
SRD5A1	27	2	0	0	0	0	1600	3043	4840
NR1D1	27	2	0	0	0	0	1601	3044	4841
ZNF703	27	1	0	0	0	0	1602	3756	4842
ADIPOR1	27	0	0	0	0	0	1603	5471	4843
PXT1	27	0	0	0	0	0	1604	5472	4844
SULT2B1	27	0	0	0	0	0	1605	5473	4845
ZNF350	27	0	0	0	0	0	1606	5474	4846
ANKRD30A	27	0	0	0	0	0	1607	5475	4847
SOCS1	26	44	21	0	0	0	1608	437	579
OLR1	26	42	19	0	0	0	1609	448	633
CSF2RB	26	37	18	0	0	0	1610	492	655
SERPINF2	26	34	1	0	0	0	1611	520	3117
DUSP6	34	10	0	0	1	0	1329	1307	4770
FOSB	28	10	3	0	1	0	1541	1312	2032
PGK2	26	24	2	0	0	0	1614	692	2403
FANCF	26	21	0	1	0	0	1615	770	4849
ID4	26	16	5	0	0	0	1616	938	1587
ETS1	149	83	24	0	0	1	381	235	507
DMD	26	14	7	0	0	0	1618	1053	1303
POU4F1	26	13	0	0	0	0	1619	1114	4850
TLR2	26	10	16	0	0	0	1620	1315	721
MYLK2	26	10	3	0	0	0	1621	1316	2044
GLS	26	8	7	0	0	0	1622	1540	1304
ZYX	23	10	2	0	1	0	1762	1319	2419
E2F2	26	5	8	0	0	0	1624	2025	1180
PTMA	26	3	8	0	0	0	1625	2595	1181
CST3	26	3	4	0	0	0	1626	2596	1789
PRDX4	9	10	1	0	1	0	3155	1341	3400
RIT2	26	2	7	0	0	0	1628	3046	1305
WNT2	26	2	2	0	0	0	1629	3047	2405
VAV2	26	2	1	0	0	0	1630	3048	3118
DKK3	26	2	0	0	0	0	1631	3049	4851
SERPINB9	26	1	9	0	0	0	1632	3757	1074
VEGFB	26	1	4	0	0	0	1633	3758	1790
WASF2	26	1	1	0	0	0	1634	3759	3119
TPM1	26	1	0	0	0	0	1635	3760	4852
GHRHR	26	0	0	1	0	0	1636	5476	4853
PEBP4	26	0	1	0	0	0	1637	5477	3120
CPT1A	26	0	1	0	0	0	1638	5478	3121
UBE2C	26	0	1	0	0	0	1639	5479	3122
HSD17B2	26	0	0	0	0	0	1640	5480	4854
BCCIP	26	0	0	0	0	0	1641	5481	4855
SLCO1A2	26	0	0	0	0	0	1642	5482	4856
TGFB1I1	26	0	0	0	0	0	1643	5483	4857
TFF2	26	0	0	0	0	0	1644	5484	4858
SLC19A3	26	0	0	0	0	0	1645	5485	4859
HNRNPU	7	10	3	0	1	0	3586	1345	2147
CD274	25	28	26	0	0	0	1647	611	490
FANCL	25	22	16	0	0	0	1648	738	722
TPT1	25	17	0	0	0	0	1649	891	4861
USP7	7	10	3	0	1	0	3587	1346	2148
HDAC4	25	13	12	0	0	0	1651	1115	865
CDKN2C	25	13	6	0	0	0	1652	1116	1446
GC	25	12	1	0	0	0	1653	1168	3123
PRDX2	25	11	0	0	0	0	1654	1240	4862
CXCR1	25	10	8	0	0	0	1655	1317	1182
RAB5A	25	9	4	0	0	0	1656	1430	1791
FLII	25	8	9	0	0	0	1657	1541	1075
DNM3	25	8	3	0	0	0	1658	1542	2045
SLC3A2	25	7	109	0	0	0	1659	1693	138
UBE2D3	25	7	4	0	0	0	1660	1694	1792
DSG3	25	7	3	0	0	0	1661	1695	2046
PRDM1	25	5	232	0	0	0	1662	2026	67
TIA1	25	5	105	0	0	0	1663	2027	142
RGCC	25	5	10	0	0	0	1664	2028	990
MT2A	25	5	5	0	0	0	1665	2029	1588
NCK1	25	5	1	0	0	0	1666	2030	3124
DYNLL1	25	5	1	0	0	0	1667	2031	3125
PHGDH	25	4	4	0	0	0	1668	2279	1793
PEPD	25	4	2	0	0	0	1669	2280	2406
MTRR	25	3	2	0	0	0	1670	2597	2407
F12	6	10	8	0	1	0	3897	1350	1210
PARK2	25	2	2	0	0	0	1672	3051	2409
EGLN3	25	2	1	0	0	0	1673	3052	3126
MST1	25	1	3	0	0	0	1674	3761	2047
OPRL1	25	1	1	0	0	0	1675	3762	3127
UBE3A	25	1	1	0	0	0	1676	3763	3128
MMP15	25	1	0	0	0	0	1677	3764	4863
REST	25	1	0	0	0	0	1678	3765	4864
YAP1	25	1	0	0	0	0	1679	3766	4865
ARHGAP1	25	0	1	1	0	0	1680	5486	3129
LRBA	25	0	1	1	0	0	1681	5487	3130
TOB1	25	0	1	1	0	0	1682	5488	3131
SEMA3F	25	0	0	1	0	0	1683	5489	4866
GCNT1	25	0	1	0	0	0	1684	5490	3132
PSMD4	25	0	1	0	0	0	1685	5491	3133
RIF1	25	0	1	0	0	0	1686	5492	3134
SRD5A2	25	0	1	0	0	0	1687	5493	3135
ZFHX3	25	0	0	0	0	0	1688	5494	4867
SCN5A	25	0	0	0	0	0	1689	5495	4868
FAM175A	25	0	0	0	0	0	1690	5496	4869
GNAQ	4	10	0	0	1	0	4606	1353	6286
ALOX15	24	40	2	0	0	0	1692	467	2410
FBL	24	32	8	0	0	0	1693	548	1183
GAS7	2	10	0	0	1	0	5766	1361	7071
CD163	24	23	17	0	0	0	1695	719	688
ID2	24	20	20	0	0	0	1696	802	594
GTF2B	24	18	7	0	0	0	1697	854	1306
TP73	24	16	9	0	0	0	1698	939	1076
HIPK2	24	16	0	0	0	0	1699	940	4870
HLX	1	10	0	0	1	0	6870	1365	7875
DHPS	24	14	5	1	0	0	1701	1056	1589
CCR2	24	14	10	0	0	0	1702	1057	992
SMPD2	24	12	2	0	0	0	1703	1169	2411
PTPRJ	24	11	6	0	0	0	1704	1241	1447
SRSF1	24	11	1	0	0	0	1705	1242	3136
TRPM2	24	11	0	0	0	0	1706	1243	4872
MYLK3	24	10	2	0	0	0	1707	1318	2412
INHA	24	8	1	1	0	0	1708	1543	3137
MAP3K14	24	7	33	0	0	0	1709	1696	411
PIAS3	24	7	2	0	0	0	1710	1697	2413
RBBP4	24	7	1	0	0	0	1711	1698	3138
C19ORF6	0	10	0	0	1	0	9312	1373	9911
ERCC5	24	6	4	0	0	0	1713	1857	1794
PROX1	24	6	3	0	0	0	1714	1858	2048
LATS2	24	6	3	0	0	0	1715	1859	2049
TSHB	66	9	7	0	1	0	769	1400	1271
PTGES	24	5	1	0	0	0	1717	2033	3139
GLO1	24	5	0	0	0	0	1718	2034	4873
SMAD1	63	9	18	0	1	0	800	1402	649
LPP	24	4	10	1	0	0	1720	2282	993
ARF1	24	4	0	1	0	0	1721	2283	4874
GAS6	24	4	3	0	0	0	1722	2284	2050
ASPSCR1	24	4	2	0	0	0	1723	2285	2414
GRB10	24	4	1	0	0	0	1724	2286	3140
ARNTL	24	3	1	0	0	0	1725	2598	3141
SERPINA5	24	3	0	0	0	0	1726	2599	4875
SULT1A3	24	3	0	0	0	0	1727	2600	4876
OR51B6	24	3	0	0	0	0	1728	2601	4877
NRG2	24	3	0	0	0	0	1729	2602	4878
KHDRBS1	49	9	1	0	1	0	1004	1411	3022
PHEX	24	2	4	0	0	0	1731	3054	1795
SLC2A3	24	2	2	0	0	0	1732	3055	2415
RPS6KA5	24	2	2	0	0	0	1733	3056	2416
EDNRA	24	1	1	1	0	0	1734	3767	3142
DDB2	24	1	3	0	0	0	1735	3768	2052
CXCL16	24	1	2	0	0	0	1736	3769	2417
ADCYAP1	24	1	1	0	0	0	1737	3770	3143
PPID	24	1	0	0	0	0	1738	3771	4879
EEF2K	24	1	0	0	0	0	1739	3772	4880
ELF5	24	0	0	1	0	0	1740	5497	4881
NDUFA13	24	0	9	0	0	0	1741	5498	1078
CDKN3	24	0	2	0	0	0	1742	5499	2418
KPNA2	24	0	1	0	0	0	1743	5500	3144
SERPINA6	24	0	0	0	0	0	1744	5501	4882
CTCFL	24	0	0	0	0	0	1745	5502	4883
CPD	24	0	0	0	0	0	1746	5503	4884
CPT2	24	0	0	0	0	0	1747	5504	4885
NBR1	24	0	0	0	0	0	1748	5505	4886
PDZK1	24	0	0	0	0	0	1749	5506	4887
MIEN1	24	0	0	0	0	0	1750	5507	4888
THOC1	24	0	0	0	0	0	1751	5508	4889
NPTN	23	171	0	0	0	0	1752	127	4890
PIM1	23	88	73	0	0	0	1753	228	211
PRB1	23	34	1	0	0	0	1754	521	3145
TPI1	23	24	7	0	0	0	1755	693	1307
CCL19	20	7	24	0	0	1	1926	1705	512
DBH	23	20	1	0	0	0	1757	803	3146
PRF1	23	19	9	0	0	0	1758	826	1079
CFH	23	18	5	0	0	0	1759	855	1591
VAV1	23	17	18	0	0	0	1760	892	656
RAB11A	23	11	1	0	0	0	1761	1244	3147
CTBP1	47	9	7	0	1	0	1041	1414	1281
GCLM	23	10	7	0	0	0	1763	1320	1308
SOX4	39	9	3	1	1	0	1182	1421	1999
HOXC6	23	6	8	1	0	0	1765	1860	1186
BCL2L2	23	6	34	0	0	0	1766	1861	403
POLR2A	23	6	0	0	0	0	1767	1862	4891
TNFRSF18	23	5	9	0	0	0	1768	2035	1080
SLC25A4	23	5	0	0	0	0	1769	2036	4892
GBA	23	4	445	0	0	0	1770	2287	30
JAG2	23	4	5	0	0	0	1771	2288	1592
SLC17A5	23	4	0	0	0	0	1772	2289	4893
ITGA9	34	9	3	0	1	0	1331	1424	2014
PAX8	23	2	5	0	0	0	1774	3058	1593
CAD	23	2	1	0	0	0	1775	3059	3149
SLC7A5	23	2	0	0	0	0	1776	3060	4894
ATRX	23	9	1	0	1	0	1764	1431	3148
PGD	15	9	0	0	1	0	2342	1445	5108
ZNF44	6	9	2	0	1	0	3899	1459	2599
PSAP	23	1	7	0	0	0	1780	3776	1309
TNFSF15	23	1	4	0	0	0	1781	3777	1797
GREM1	23	1	3	0	0	0	1782	3778	2054
CKS2	23	1	1	0	0	0	1783	3779	3151
TFAM	23	1	1	0	0	0	1784	3780	3152
ESRRB	23	1	0	0	0	0	1785	3781	4896
MED14	23	1	0	0	0	0	1786	3782	4897
CA12	23	0	0	1	0	0	1787	5509	4898
IRF6	23	0	0	1	0	0	1788	5510	4899
YY1AP1	23	0	1	0	0	0	1789	5511	3153
ADAM9	23	0	1	0	0	0	1790	5512	3154
SMURF2	23	0	1	0	0	0	1791	5513	3155
MUC17	23	0	0	0	0	0	1792	5514	4900
ESRRG	23	0	0	0	0	0	1793	5515	4901
ZBTB10	23	0	0	0	0	0	1794	5516	4902
LATS1	23	0	0	0	0	0	1795	5517	4903
WASF3	23	0	0	0	0	0	1796	5518	4904
NRG3	23	0	0	0	0	0	1797	5519	4905
BABAM1	23	0	0	0	0	0	1798	5520	4906
LIF	22	70	6	0	0	0	1799	284	1448
SRI	22	21	12	0	0	0	1800	772	866
SAMHD1	22	17	9	0	0	0	1801	893	1081
PLA2G2A	22	16	4	0	0	0	1802	941	1798
PRKCE	22	13	2	1	0	0	1803	1117	2420
CD74	22	12	79	0	0	0	1804	1170	190
HAMP	22	12	8	0	0	0	1805	1171	1187
H6PD	22	10	6	0	0	0	1806	1321	1449
TIE1	22	8	2	0	0	0	1807	1544	2421
TEP1	22	8	2	0	0	0	1808	1545	2422
CIITA	22	7	79	0	0	0	1809	1699	191
MLN	22	7	29	0	0	0	1810	1700	445
TUBB	22	7	0	0	0	0	1811	1701	4907
RALBP1	4	9	2	0	1	0	4610	1471	2664
FGD1	22	6	5	0	0	0	1813	1864	1594
KAT2A	22	6	3	0	0	0	1814	1865	2055
CXCL5	22	6	1	0	0	0	1815	1866	3156
NOD2	22	5	8	0	0	0	1816	2037	1189
ST8SIA1	22	5	1	0	0	0	1817	2038	3157
IL5RA	2	9	0	0	1	0	5770	1476	7072
EVL	22	4	1	0	0	0	1819	2291	3158
KLK8	22	4	1	0	0	0	1820	2292	3159
EEF1A1	22	4	0	0	0	0	1821	2293	4908
AGTR2	22	3	1	1	0	0	1822	2603	3160
CCR6	22	3	18	0	0	0	1823	2604	657
SPIB	1	5	23	0	0	1	6925	2161	538
PDHA2	22	3	2	0	0	0	1825	2606	2424
HOXB9	22	3	1	0	0	0	1826	2607	3161
PITX2	22	2	1	0	0	0	1827	3061	3162
TENM4	22	2	0	0	0	0	1828	3062	4909
THBS2	22	1	1	1	0	0	1829	3783	3163
ERN1	22	1	10	0	0	0	1830	3784	994
SLC2A4	22	1	4	0	0	0	1831	3785	1799
INPP4B	22	1	1	0	0	0	1832	3786	3164
ECM1	22	1	0	0	0	0	1833	3787	4910
SKIL	22	1	0	0	0	0	1834	3788	4911
BCAS1	22	1	0	0	0	0	1835	3789	4912
TAB1	22	0	5	0	0	0	1836	5521	1595
IL21R	2	0	21	0	0	1	6118	7434	585
LIMA1	22	0	0	0	0	0	1838	5523	4913
PAPPA	22	0	0	0	0	0	1839	5524	4914
PADI4	22	0	0	0	0	0	1840	5525	4915
DIRC2	22	0	0	0	0	0	1841	5526	4916
PPIP5K1	22	0	0	0	0	0	1842	5527	4917
PAK4	22	0	0	0	0	0	1843	5528	4918
KLF8	22	0	0	0	0	0	1844	5529	4919
PLCG2	1	4	21	0	0	1	6946	2470	586
THBD	21	52	3	0	0	0	1846	373	2057
PKNOX1	1	9	5	0	1	0	6878	1481	1693
SRSF2	21	27	3	0	0	0	1848	627	2059
CBX5	21	25	0	0	0	0	1849	671	4920
CRKL	21	22	5	0	0	0	1850	739	1596
MYCL1	21	16	27	0	0	0	1851	942	471
IRF2	21	15	27	0	0	0	1852	994	472
POLD1	21	10	4	0	0	0	1853	1322	1800
HRASLS	21	9	6	0	0	0	1854	1432	1450
FCGR3A	21	7	29	0	0	0	1855	1702	446
NAMPT	21	7	2	0	0	0	1856	1703	2426
PTBP1	21	7	0	0	0	0	1857	1704	4921
S100A10	21	6	3	0	0	0	1858	1867	2060
SDHC	21	6	0	0	0	0	1859	1868	4922
MLL2	21	5	19	0	0	0	1860	2039	634
SMPD3	21	5	1	0	0	0	1861	2040	3165
BUB1	50	8	7	0	1	0	991	1517	1278
DFFA	21	4	13	0	0	0	1863	2295	820
SLC19A1	21	4	7	0	0	0	1864	2296	1310
PSMB6	21	4	3	0	0	0	1865	2297	2061
UBC	172	29	18	0	0	1	327	579	642
DLL4	21	4	2	0	0	0	1867	2299	2428
BAG3	21	4	2	0	0	0	1868	2300	2429
XPA	21	4	1	0	0	0	1869	2301	3166
SRY	48	8	2	0	1	0	1023	1519	2342
COL1A1	21	3	2	1	0	0	1871	2609	2430
PIK3C2A	21	3	1	0	0	0	1872	2610	3167
DNAJB7	21	3	1	0	0	0	1873	2611	3168
ATP5A1	21	3	0	0	0	0	1874	2612	4924
SLC5A8	21	3	0	0	0	0	1875	2613	4925
SMOX	21	2	1	1	0	0	1876	3063	3169
KDM4C	21	2	10	0	0	0	1877	3064	995
ANXA6	21	2	3	0	0	0	1878	3065	2062
SSX2	21	2	2	0	0	0	1879	3066	2431
CYTL1	21	2	1	0	0	0	1880	3067	3170
CXCL14	21	1	0	1	0	0	1881	3790	4926
GPC1	21	1	2	0	0	0	1882	3791	2432
FDPS	21	1	1	0	0	0	1883	3792	3171
LRP5	21	1	1	0	0	0	1884	3793	3172
PAICS	21	1	1	0	0	0	1885	3794	3173
LAPTM4B	21	1	0	0	0	0	1886	3795	4927
RERG	21	1	0	0	0	0	1887	3796	4928
DNAJB6	21	1	0	0	0	0	1888	3797	4929
G3BP1	21	1	0	0	0	0	1889	3798	4930
NISCH	21	1	0	0	0	0	1890	3799	4931
AZGP1	21	0	0	1	0	0	1891	5530	4932
MAP3K3	21	0	2	0	0	0	1892	5531	2433
ACSL4	21	0	1	0	0	0	1893	5532	3174
CRY2	21	0	0	0	0	0	1894	5533	4933
EDN2	21	0	0	0	0	0	1895	5534	4934
ING4	21	0	0	0	0	0	1896	5535	4935
LMO7	21	0	0	0	0	0	1897	5536	4936
RETN	21	0	0	0	0	0	1898	5537	4937
LGMN	21	0	0	0	0	0	1899	5538	4938
ITGB3BP	21	0	0	0	0	0	1900	5539	4939
HSPB8	21	0	0	0	0	0	1901	5540	4940
CLDN6	21	0	0	0	0	0	1902	5541	4941
TRRAP	21	0	0	0	0	0	1903	5542	4942
BAP1	21	0	0	0	0	0	1904	5543	4943
AHRR	21	0	0	0	0	0	1905	5544	4944
S100A14	21	0	0	0	0	0	1906	5545	4945
ATAD2	21	0	0	0	0	0	1907	5546	4946
PRDM14	21	0	0	0	0	0	1908	5547	4947
RAB8A	20	156	9	0	0	0	1909	139	1082
VASP	48	8	1	0	1	0	1024	1520	3025
KIDINS220	28	8	4	0	1	0	1544	1539	1784
HLA-C	20	42	15	0	0	0	1912	450	754
MVP	20	29	3	0	0	0	1913	592	2064
DNAJC5	20	26	5	0	0	0	1914	654	1597
IL7R	20	24	38	0	0	0	1915	694	357
LDLRAP1	20	23	32	0	0	0	1916	720	423
CDK5	20	20	6	0	0	0	1917	804	1451
NFYA	20	18	9	0	0	0	1918	856	1083
ENO3	20	18	2	0	0	0	1919	857	2434
SUV39H1	20	17	4	0	0	0	1920	894	1801
GNAT1	20	14	4	0	0	0	1921	1058	1802
LAPTM4A	20	10	0	0	0	0	1922	1323	4948
PIAS4	20	9	0	0	0	0	1923	1433	4949
TECR	20	8	0	0	0	0	1924	1546	4950
CBX1	20	8	0	0	0	0	1925	1547	4951
HLA-DQA1	8	6	14	0	0	1	3367	1911	793
STIM1	20	7	1	0	0	0	1927	1706	3175
HINFP	20	6	2	1	0	0	1928	1869	2435
CFB	20	5	13	1	0	0	1929	2041	821
TGFBR3	20	5	1	0	0	0	1930	2042	3176
PAOX	20	5	1	0	0	0	1931	2043	3177
MAP3K8	20	4	5	0	0	0	1932	2302	1598
EEF1A2	20	4	4	0	0	0	1933	2303	1803
B4GALNT2	20	4	3	0	0	0	1934	2304	2065
CALB1	20	4	2	0	0	0	1935	2305	2436
TYRO3	20	4	2	0	0	0	1936	2306	2437
CENPA	20	4	0	0	0	0	1937	2307	4952
FANCE	20	3	2	1	0	0	1938	2614	2438
SPINT2	20	3	1	1	0	0	1939	2615	3178
LIPA	20	3	4	0	0	0	1940	2616	1804
RAD9A	20	3	1	0	0	0	1941	2617	3179
NOX4	20	2	1	1	0	0	1942	3068	3180
MCM3	20	2	1	0	0	0	1943	3069	3181
MGAT5	20	2	1	0	0	0	1944	3070	3182
C8ORF4	20	2	1	0	0	0	1945	3071	3183
NUPR1	20	1	2	1	0	0	1946	3800	2439
SDHD	20	1	58	0	0	0	1947	3801	262
TNFSF4	20	1	3	0	0	0	1948	3802	2066
DPH1	20	1	1	0	0	0	1949	3803	3184
PIWIL2	20	1	1	0	0	0	1950	3804	3185
AKT1S1	20	1	1	0	0	0	1951	3805	3186
KCNMA1	20	1	0	0	0	0	1952	3806	4953
FXYD3	20	0	3	1	0	0	1953	5548	2067
RAB25	20	0	0	1	0	0	1954	5549	4954
KDM4B	20	0	0	1	0	0	1955	5550	4955
BCL10	20	0	387	0	0	0	1956	5551	39
REG3A	20	0	13	0	0	0	1957	5552	822
MAN1A2	20	0	13	0	0	0	1958	5553	823
MTBP	20	0	12	0	0	0	1959	5554	867
ARID1A	20	0	4	0	0	0	1960	5555	1805
PMS1	20	0	2	0	0	0	1961	5556	2440
BMPR1A	20	0	1	0	0	0	1962	5557	3187
BIN1	20	0	0	0	0	0	1963	5558	4956
SCGB2A1	20	0	0	0	0	0	1964	5559	4957
WNT7B	20	0	0	0	0	0	1965	5560	4958
RAB6C	20	0	0	0	0	0	1966	5561	4959
SLC9A3R2	20	0	0	0	0	0	1967	5562	4960
STARD10	20	0	0	0	0	0	1968	5563	4961
HEPACAM	20	0	0	0	0	0	1969	5564	4962
NEK10	20	0	0	0	0	0	1970	5565	4963
GATA1	19	763	11	0	0	0	1971	29	926
DHDDS	16	8	14	0	1	0	2239	1555	788
HLA-DRB1	19	29	33	0	0	0	1973	593	412
MAP2K7	16	8	6	0	1	0	2240	1556	1457
SMN1	19	22	4	0	0	0	1975	740	1806
BCL2A1	19	15	74	0	0	0	1976	995	205
ABCC4	19	14	2	0	0	0	1977	1059	2442
SMARCC1	11	8	0	0	1	0	2815	1562	5315
SMAD5	19	13	8	0	0	0	1979	1119	1190
LCK	19	11	30	0	0	0	1980	1245	440
RHD	19	10	5	0	0	0	1981	1324	1599
MAP2	19	10	1	0	0	0	1982	1325	3188
SIM2	19	10	0	0	0	0	1983	1326	4965
PRKCZ	19	9	5	0	0	0	1984	1434	1600
F5	19	9	0	0	0	0	1985	1435	4966
RIN1	19	9	0	0	0	0	1986	1436	4967
ACP1	19	8	4	0	0	0	1987	1548	1807
PTP4A3	19	8	0	0	0	0	1988	1549	4968
EFS	19	7	2	1	0	0	1989	1707	2443
POLR3D	19	7	13	0	0	0	1990	1708	824
EGR2	19	7	11	0	0	0	1991	1709	927
MBD1	19	7	4	0	0	0	1992	1710	1808
WHSC1	19	6	5	0	0	0	1993	1870	1601
YES1	19	6	4	0	0	0	1994	1871	1809
PYY	19	6	2	0	0	0	1995	1872	2444
MAGEA1	19	5	2	0	0	0	1996	2044	2445
BEX2	19	5	0	0	0	0	1997	2045	4969
MDK	19	4	4	0	0	0	1998	2308	1810
SMC1A	19	4	3	0	0	0	1999	2309	2068
[truncated: 8,488 more rows]

## Sheet: BC Citation Ranking Graph
#	BC Gene Citation Ranking	AML Gene Citation Ranking	DLCL Gene Citation Ranking	Gene Name
1	1	307	151	ERBB2
2	2	659	732	BRCA1
3	4	1644	733	PGR
4	13	188	192	IGF1
5	14	430	495	CDH1
6	17	1382	1122	ESR1
7	19	597	104	MUC1
8	22	49	57	PRKACG
9	24	47	66	MAPK1
10	41	74	110	FN1
11	42	1645	1538	ESR2
12	43	289	207	MMP2
13	47	5288	2289	ERBB3
14	61	116	88	MTOR
15	62	409	801	AR
16	68	495	802	IGF1R
17	82	88	91	TNFSF10
18	91	104	65	CASP9
19	92	150	143	CXCL12
20	111	6	406	RARA
21	116	752	894	TGFA
22	125	192	216	MAP2K1
23	127	574	524	SPP1
24	132	2957	1948	CYP1B1
25	134	278	1716	FANCC
26	136	1977	611	EPCAM
27	153	2958	1542	KRT14
28	159	2531	4618	PRLR
29	161	1285	1950	FGFR2
30	168	2202	2292	WNT1
31	177	5293	4619	PIP
32	180	1287	4620	CYP2D6
33	181	505	363	SMAD3
34	209	1387	2967	ELF3
35	214	662	670	GATA3
36	224	397	229	NOS2
37	229	486	450	INSR
38	238	471	1251	TFAP2A
39	253	842	527	CTSB
40	258	1800	1037	MMP3
41	271	1650	1954	ADIPOQ
42	277	1092	4624	MMP13
43	280	294	566	PTGER3
44	285	42	53	NCAM1
45	287	5298	4625	MMP11
46	302	5299	4626	SCGB2A2
47	315	322	768	ODC1
48	322	5303	4629	APOD
49	353	1805	1721	GRP
50	354	217	506	PRKCA
51	358	3651	2975	GRB7
52	359	279	737	PDGFRB
53	367	784	352	SKP2
54	391	236	479	VWF
55	429	256	196	VCAM1
56	433	2213	4635	DBT
57	451	2967	1547	KRT7
58	454	2215	2304	ST14
59	459	812	298	ADRA1A
60	482	5313	4642	SPDEF
61	487	1657	1139	TIMP3
62	501	247	965	LTF
63	530	1985	1734	SPARC
64	540	2219	1549	VCAN
65	549	1218	2984	HNMT
66	564	464	155	CXCL10
67	577	2223	2985	NRIP1
68	595	921	1146	HMGA2
69	603	645	1262	ERCC2
70	617	282	1147	ABCC3
71	631	1661	2309	F11R
72	636	1096	709	SMAD7
73	648	1397	2312	UGCG
74	659	1990	1974	NAT1
75	664	1508	2314	DCN
76	666	5325	4660	TOX3
77	692	880	1266	RPS6KA3
78	695	2229	1150	PTCH1
79	697	5329	4665	ADAM12
80	705	647	1267	IGFBP7
81	726	2545	1556	POSTN
82	728	5333	2320	TFF3
83	748	3668	1409	CTSK
84	750	340	268	APAF1
85	761	453	169	C3
86	772	2984	4672	CDH11
87	793	1664	1743	SDHB
88	820	2237	4681	CYP2B6
89	829	1296	511	HSPA1A
90	838	1668	1051	EGR3
91	842	5345	3006	CLDN4
92	851	1403	1982	OGG1
93	860	349	1559	GGPS1
94	861	404	1560	THRA
95	876	1038	1052	EXOG
96	877	1405	976	CDC25B
97	891	2244	2332	MAPT
98	894	3682	1750	DACH1
99	900	1226	3010	CRABP2
100	903	2991	3011	NRP2
101	906	3683	4692	TBX3
102	922	2994	1752	SPHK2
103	924	3685	3013	SLC39A6
104	927	5	135	RUNX1
105	936	1098	391	CD46
106	959	3690	4695	UBR5
107	961	5354	3018	SPINT1
108	975	1826	1565	APOE
109	1006	1518	1279	PGK1
110	1043	2002	1567	TAGLN
111	1060	1229	3030	RHOB
112	1068	465	342	IL6ST
113	1076	3003	3034	RAD52
114	1087	1416	1285	SERPINA3
115	1106	2564	4723	NRL
116	1109	3005	1996	SSTR1
117	1110	3006	4724	SULF1
118	1112	5375	4726	EFNA1
119	1125	2249	4728	CNKSR1
120	1127	2567	1422	CXCL11
121	1128	2568	1571	COL1A2
122	1146	3707	3045	TGFB3
123	1150	5381	4735	AGR2
124	1153	12	232	RUNX1T1
125	1162	1526	2355	PER2
126	1164	1673	3047	PLD1
127	1165	2251	2356	AGTR1
128	1170	5384	3050	FAP
129	1177	386	3052	NUMA1
130	1182	1421	1999	SOX4
131	1189	2571	2358	KDM5B
132	1217	3012	3058	LRIG1
133	1219	3712	4749	EGLN2
134	1221	5395	2003	WWP1
135	1222	5396	2361	LGALS3BP
136	1231	984	751	PTER
137	1255	5399	1428	SLC16A1
138	1256	5400	1766	COL3A1
139	1257	5401	4756	CLDN3
140	1267	1158	2364	KSR1
141	1285	3015	2366	SREBF1
142	1288	3721	3068	FABP7
143	1302	935	117	BCL3
144	1304	1231	817	HNF1A
145	1309	2581	3073	NAPA
146	1316	5410	4769	FBLN1
147	1322	799	818	SLC5A7
148	1326	1232	1577	MTAP
149	1346	5413	4774	UPP1
150	1366	1840	1773	SREBF2
151	1369	3022	3079	CCNG2
152	1376	5419	2375	LUM
153	1377	5420	4781	STC2
154	1378	5421	4782	GPNMB
155	1404	3730	4787	TRIM25
156	1406	5427	3083	SERPINF1
157	1426	1686	2380	PTGER1
158	1445	5435	4799	MMP26
159	1474	5441	3096	PPP5C
160	1509	2589	1300	PRKD1
161	1510	2590	4815	TRPS1
162	1511	3036	2393	PTPN22
163	1532	491	3108	NF1
164	1557	3748	1584	OPRM1
165	1565	5461	2399	TPD52
166	1566	5462	4829	PPT1
167	1567	5463	4830	SLC4A7
168	1597	3040	4839	CALCR
169	1615	770	4849	FANCF
170	1636	5476	4853	GHRHR
171	1680	5486	3129	ARHGAP1
172	1681	5487	3130	LRBA
173	1682	5488	3131	TOB1
174	1683	5489	4866	SEMA3F
175	1701	1056	1589	DHPS
176	1708	1543	3137	INHA
177	1712	1856	1077	MAPKAPK2
178	1719	2281	1590	TACSTD2
179	1720	2282	993	LPP
180	1721	2283	4874	ARF1
181	1734	3767	3142	EDNRA
182	1740	5497	4881	ELF5
183	1765	1860	1186	HOXC6
184	1777	3773	2053	PPARD
185	1787	5509	4898	CA12
186	1788	5510	4899	IRF6
187	1803	1117	2420	PRKCE
188	1822	2603	3160	AGTR2
189	1829	3783	3163	THBS2
190	1871	2609	2430	COL1A1
191	1876	3063	3169	SMOX
192	1881	3790	4926	CXCL14
193	1891	5530	4932	AZGP1
194	1928	1869	2435	HINFP
195	1929	2041	821	CFB
196	1938	2614	2438	FANCE
197	1939	2615	3178	SPINT2
198	1942	3068	3180	NOX4
199	1946	3800	2439	NUPR1
200	1953	5548	2067	FXYD3
201	1954	5549	4954	RAB25
202	1955	5550	4955	KDM4B
203	1978	1118	4964	RPS14
204	1989	1707	2443	EFS
205	2021	5566	4980	FBN1
206	2046	613	4995	PRDX3
207	2069	3079	1606	MAPK11
208	2070	3080	5000	AMFR
209	2077	3818	3203	RCVRN
210	2087	5589	5007	RAD51D
211	2088	5590	5008	TNN
212	2128	1437	5027	NR2C1
213	2137	1874	5031	TACR1
214	2145	2627	3214	A2M
215	2156	3088	3217	SCNN1A
216	2157	3089	5035	ACTA2
217	2168	3828	5039	MAP2K5
218	2171	3831	2078	MRPS30
219	2172	3832	5040	PPP2R5D
220	2186	5616	5046	BMPR1B
221	2187	5617	5047	MAGED2
222	2219	321	431	PBX1
223	2243	1715	658	GLI3
224	2255	2637	3227	LRP2
225	2256	2638	5071	TPH1
226	2272	3847	313	SPAG9
227	2273	3848	1191	ENPP1
228	2274	3849	1613	VTCN1
229	2275	3850	3230	BHLHE40
230	2287	5648	5083	MTNR1A
231	2288	5649	5084	PRSS8
232	2340	1248	5107	PTPN9
233	2373	3108	5116	NF2
234	2395	5683	1618	GLUL
235	2396	5684	3250	CTBP2
236	2397	5685	5127	TFAP2B
237	2398	5686	5128	BHLHE41
238	2399	5687	5129	GALNT6
239	2400	5688	5130	VAV3
240	2401	5689	5131	CERS2
241	2402	5690	5132	NDUFAF4
242	2437	1332	1092	COLEC10
243	2448	2328	3256	SUCLG1
244	2449	2329	1837	PLVAP
245	2450	2330	5158	FABP4
246	2464	3119	5161	SLC25A3
247	2476	3877	1463	AMD1
248	2498	5715	3267	ELSPBP1
249	2499	5716	5175	CDH4
250	2500	5717	5176	PDGFD
251	2501	5718	5177	SCGB1D2
252	2539	723	3273	TBXA2R
253	2548	1559	1624	RARRES3
254	2553	1884	1625	BST2
255	2572	2661	5212	MGP
256	2580	3129	3280	GP2
257	2581	3130	5213	RARRES1
258	2591	3899	2492	NFATC4
259	2594	3902	3282	BGN
260	2607	5752	5224	KRT15
261	2662	1003	5246	DUSP4
262	2675	1889	5250	MBD3
263	2693	2345	872	SERPING1
264	2710	3140	3306	SPG7
265	2720	3916	2506	WNT2B
266	2721	3917	3308	LSR
267	2722	3918	5270	RXRB
268	2740	5789	3313	FZD1
269	2741	5790	3314	IRX5
270	2742	5791	5280	NKX3-1
271	2743	5792	5281	NMT1
272	2822	1730	5317	SFRP4
273	2834	2352	5321	DARC
274	2835	2353	5322	NUDT1
275	2843	2680	1328	MXD1
276	2844	2681	3334	MED23
277	2854	3149	1848	PDX1
278	2855	3150	3338	FMO2
279	2856	3151	5328	GAS1
280	2871	3940	3342	CYB5A
281	2872	3941	3343	KIAA1109
282	2894	5842	5347	FBLN2
283	2895	5843	5348	SCUBE2
284	2969	1129	5393	AQP1
285	2970	1181	1006	KDM5D
286	2988	2083	1851	PIAS2
287	3002	2692	535	COMP
288	3003	2693	5397	PVRL1
289	3016	3162	5402	NEU3
290	3030	3965	5408	GALNT3
291	3031	3966	5409	SRPK1
292	3032	3967	5410	WNT7A
293	3052	5907	5423	FDX1
294	3053	5908	5424	VWA5A
295	3054	5909	5425	LRRC15
296	3055	5910	5426	HRH4
297	3056	5911	5427	BAIAP2
298	3169	2088	1859	ZFP36L1
299	3187	3176	5494	RPL10
300	3212	3993	2540	IFI27
301	3213	3994	5507	IAPP
302	3247	5990	1646	C1QA
303	3248	5991	5527	EXTL3
304	3249	5992	5528	ITSN1
305	3250	5993	5529	SLCO4A1
306	3366	1910	2551	PAX3
307	3394	3197	5601	EIF4EBP2
308	3422	4034	794	IGHA1
309	3423	4035	5612	ACD
310	3456	6076	3455	KCNA1
311	3457	6077	3456	TNFAIP6
312	3458	6078	5629	COL11A1
313	3459	6079	5630	FADS1
314	3460	6080	5631	TRIM29
315	3569	387	5712	INHBA
316	3570	416	2145	PRDM16
317	3574	776	5713	KAT6B
318	3585	1256	2568	KCNH6
319	3600	1746	5718	RAB31
320	3606	1916	5721	RNH1
321	3610	2095	5723	SH3YL1
322	3632	2726	1490	ITCH
323	3633	2727	2155	ADCY1
324	3648	3223	2157	GCK
325	3669	4068	2578	PATZ1
326	3670	4069	5746	GGA3
327	3677	4076	3485	DIO3
328	3723	6187	1208	POLI
329	3724	6188	1492	IGKC
330	3725	6189	3498	LGALS8
331	3726	6190	3499	CHIA
332	3727	6191	5765	NPHP4
333	3728	6192	5766	PRR5
334	3729	6193	5767	HAP1
335	3730	6194	5768	ZKSCAN3
336	3731	6195	5769	ST6GALNAC2
337	3732	6196	5770	PGAP3
338	3904	1752	3521	ZNF24
339	3910	2106	3522	CST8
340	3917	2389	3524	AKAP1
341	3926	2738	5886	FBP1
342	3967	4125	5905	HIF3A
343	4002	6340	1659	INTS6
344	4003	6341	2173	THBS3
345	4004	6342	3544	ADCYAP1R1
346	4005	6343	5926	C4A
347	4006	6344	5927	CPB1
348	4007	6345	5928	MAP7
349	4008	6346	5929	MYOF
350	4009	6347	5930	PIK3R3
351	4010	6348	5931	CERS4
352	4011	6349	5932	HRH3
353	4012	6350	5933	PRUNE
354	4013	6351	5934	PSAT1
355	4183	1014	3571	HOXD3
356	4186	1077	2179	ABCA3
357	4204	1590	2627	NR6A1
358	4206	1592	6054	SETMAR
359	4232	2398	1882	ITPR3
360	4270	3272	1216	TMBIM6
361	4271	3273	6082	CDC42EP3
362	4295	4160	2640	COL14A1
363	4300	4165	1217	TLR5
364	4301	4166	2642	COL4A1
365	4302	4167	3592	ARSB
366	4303	4168	3593	TCP1
367	4304	4169	6098	ATP5B
368	4305	4170	6099	EPHA3
369	4306	4171	6100	ECHDC1
370	4307	4172	6101	DNAJA2
371	4369	6505	2648	SMAD9
372	4370	6506	2649	ADAMTS13
373	4371	6507	3610	ALPPL2
374	4372	6508	3611	DLX6
375	4373	6509	3612	SELENBP1
376	4374	6510	3613	ACOT8
377	4375	6511	3614	PSME3
378	4376	6512	6133	DST
379	4377	6513	6134	PIGT
380	4378	6514	6135	COL10A1
381	4379	6515	6136	EPYC
382	4380	6516	6137	EFNB1
383	4381	6517	6138	EPHB3
384	4382	6518	6139	GABRP
385	4383	6519	6140	RPRM
386	4384	6520	6141	NASP
387	4385	6521	6142	RASGRF1
388	4386	6522	6143	ASPN
389	4387	6523	6144	ANO1
390	4388	6524	6145	SP4
391	4389	6525	6146	ARHGAP32
392	4390	6526	6147	CPSF4
393	4391	6527	6148	TJP3
394	4392	6528	6149	TMPRSS3
395	4593	906	3653	CA1
396	4598	1080	1668	ULBP1
397	4611	1472	6287	LRRC32
398	4626	2122	6294	PLCB2
399	4650	2770	1890	MARK2
400	4651	2771	3662	VPS52
401	4652	2772	6309	IFT122
402	4684	3300	6324	ELK4
403	4712	4234	6338	SCLY
404	4720	4242	1356	IGLC2
405	4721	4243	2673	DHODH
406	4722	4244	3678	ADORA2B
407	4723	4245	6342	GJA4
408	4724	4246	6343	GGT5
409	4797	6717	3692	RYBP
410	4798	6718	6391	BRS3
411	4799	6719	6392	CST1
412	4800	6720	6393	EDA
413	4801	6721	6394	DPT
414	4802	6722	6395	GOLGB1
415	4803	6723	6396	MLNR
416	4804	6724	6397	HUS1
417	4805	6725	6398	MSH4
418	4806	6726	6399	MAGEB1
419	4807	6727	6400	PLXDC1
420	4808	6728	6401	TBCD
421	4809	6729	6402	IL20RA
422	4810	6730	6403	CLDN8
423	4811	6731	6404	CERS6
424	4812	6732	6405	RGS6
425	4813	6733	6406	HMG20B
426	4814	6734	6407	EXOC3
427	4815	6735	6408	NENF
428	5091	1357	3739	HOXB2
429	5108	1936	757	STX2
430	5109	1937	2697	RGS5
431	5110	1938	6604	ADRA2A
432	5150	2803	1677	IL13RA1
433	5151	2804	3751	RCAN1
434	5152	2805	6624	GPLD1
435	5183	3332	1678	ATP2A2
436	5184	3333	3758	HOXC10
437	5217	4319	6656	XPNPEP1
438	5222	4324	1224	IGF2BP3
439	5223	4325	2712	LDHC
440	5224	4326	3768	NAGLU
441	5225	4327	6660	EPHA5
442	5226	4328	6661	NLE1
443	5227	4329	6662	NYX
444	5329	6986	1682	GRK5
445	5330	6987	2721	COL6A1
446	5331	6988	2722	SEPP1
447	5332	6989	3784	GRIN2B
448	5333	6990	3785	LAMA4
449	5334	6991	3786	C1GALT1
450	5335	6992	3787	PEAK1
451	5336	6993	3788	CEP250
452	5337	6994	6730	ALOX15B
453	5338	6995	6731	CPA2
454	5339	6996	6732	COL5A2
455	5340	6997	6733	CST4
456	5341	6998	6734	CTSZ
457	5342	6999	6735	ITGB6
458	5343	7000	6736	DNAJC12
459	5344	7001	6737	SEMA3G
460	5345	7002	6738	NVL
461	5346	7003	6739	PLIN1
462	5347	7004	6740	H2AFJ
463	5348	7005	6741	RRBP1
464	5349	7006	6742	STRN
465	5350	7007	6743	SLC7A8
466	5351	7008	6744	FGF16
467	5352	7009	6745	CPNE3
468	5353	7010	6746	ACOX3
469	5354	7011	6747	HS3ST3B1
470	5355	7012	6748	SLC23A2
471	5356	7013	6749	UST
472	5357	7014	6750	AKAP9
473	5358	7015	6751	IPO8
474	5359	7016	6752	TSPAN13
475	5360	7017	6753	CYP3A43
476	5767	1362	3833	HOXA4
477	5771	1477	1107	MAFB
478	5777	1609	7076	AGFG2
479	5778	1610	7077	HOXA11
480	5779	1611	7078	PLAG1
481	5808	2444	3841	IGHMBP2
482	5831	2836	7109	P2RY1
483	5832	2837	7110	P2RY4
484	5864	3368	2747	RAP2B
485	5865	3369	3848	CYBRD1
486	5866	3370	7129	RAB2A
487	5867	3371	7130	RPL28
488	5868	3372	7131	SENP3
489	5869	3373	7132	NEBL
490	5918	4431	7160	ZNF148
491	5931	4444	3863	BLVRA
492	5932	4445	3864	RABEP1
493	5933	4446	3865	YARS
494	5934	4447	3866	AHNAK
495	5935	4448	7168	GNS
496	5936	4449	7169	NAB1
497	5937	4450	7170	YIPF1
498	5938	4451	7171	GJC1
499	5939	4452	7172	CELSR1
500	5940	4453	7173	DEPTOR
501	6072	7388	663	ATP4A
502	6073	7389	1519	SEC31A
503	6074	7390	2765	EFNB3
504	6075	7391	3898	CACNA1D
505	6076	7392	3899	FOXE3
506	6077	7393	3900	TROVE2
507	6078	7394	3901	ZFX
508	6079	7395	3902	CER1
509	6080	7396	3903	IGF2BP2
510	6081	7397	7252	ACADSB
511	6082	7398	7253	AEBP1
512	6083	7399	7254	ATP6AP1
513	6084	7400	7255	CST5
514	6085	7401	7256	GM2A
515	6086	7402	7257	IPO5
516	6087	7403	7258	MYO6
517	6088	7404	7259	CNOT4
518	6089	7405	7260	MAML3
519	6090	7406	7261	PDGFRL
520	6091	7407	7262	PDE4D
521	6092	7408	7263	RLBP1
522	6093	7409	7264	RPS28
523	6094	7410	7265	TCOF1
524	6095	7411	7266	GPATCH2
525	6096	7412	7267	COG2
526	6097	7413	7268	MORC2
527	6098	7414	7269	SHANK2
528	6099	7415	7270	TTC39A
529	6100	7416	7271	TSTA3
530	6101	7417	7272	ARHGAP19
531	6102	7418	7273	SF3B3
532	6103	7419	7274	NUP188
533	6104	7420	7275	RAB7A
534	6105	7421	7276	TTLL5
535	6106	7422	7277	RRP12
536	6107	7423	7278	EDF1
537	6108	7424	7279	PPFIBP2
538	6109	7425	7280	ACSF2
539	6110	7426	7281	TREX2
540	6111	7427	7282	ARFGEF2
541	6112	7428	7283	ARFIP1
542	6113	7429	7284	SLC2A10
543	6114	7430	7285	FGF22
544	6115	7431	7286	MARCKSL1
545	6116	7432	7287	PARVB
546	6117	7433	7288	IQCK
547	6871	1366	7876	L3MBTL1
548	6890	1614	7885	FMOD
549	6891	1615	7886	CACNA1G
550	6944	2468	7915	HIST1H2BD
551	6945	2469	7916	SLC12A4
552	6978	2870	4030	DUSP7
553	6979	2871	7939	GAA
554	6980	2872	7940	RAMP3
555	7025	3428	7960	HPCAL1
556	7026	3429	7961	SLC35A2
557	7129	4607	1524	XCR1
558	7130	4608	2807	CCL15
559	7131	4609	8027	HOXD12
560	7132	4610	8028	PARN
561	7133	4611	8029	PRKAB2
562	7134	4612	8030	DNAJC7
563	7135	4613	8031	ANGPTL2
564	7136	4614	8032	NNT
565	7137	4615	8033	HIST1H4J
566	7138	4616	8034	TBPL1
567	7139	4617	8035	RAMP2
568	7354	8152	1697	BLK
569	7355	8153	2248	IFNA7
570	7356	8154	2820	CRYGA
571	7357	8155	2821	PAX4
572	7358	8156	2822	PLXNB2
573	7359	8157	2823	ALDH1L1
574	7360	8158	2824	RBM26
575	7361	8159	4100	ASIP
576	7362	8160	4101	COL5A1
577	7363	8161	4102	CYB561
578	7364	8162	4103	GPX5
579	7365	8163	4104	PAPOLB
580	7366	8164	4105	SLC6A11
581	7367	8165	4106	TRPM4
582	7368	8166	4107	LAMTOR2
583	7369	8167	8189	AP2B1
584	7370	8168	8190	ALX3
585	7371	8169	8191	AIRE
586	7372	8170	8192	ARR3
587	7373	8171	8193	AVPR1A
588	7374	8172	8194	C1R
589	7375	8173	8195	SIRT6
590	7376	8174	8196	RAB6B
591	7377	8175	8197	CRHR2
592	7378	8176	8198	CHST15
593	7379	8177	8199	EFNA4
594	7380	8178	8200	GLRA1
595	7381	8179	8201	SUV420H1
596	7382	8180	8202	GALR1
597	7383	8181	8203	MED31
598	7384	8182	8204	GUCY2F
599	7385	8183	8205	GUCY1A3
600	7386	8184	8206	PDE11A
601	7387	8185	8207	GPR3
602	7388	8186	8208	INSRR
603	7389	8187	8209	MVD
604	7390	8188	8210	MC2R
605	7391	8189	8211	CRISPLD2
606	7392	8190	8212	PAFAH1B1
607	7393	8191	8213	SCYL3
608	7394	8192	8214	POLR2C
609	7395	8193	8215	EXOSC9
610	7396	8194	8216	PRPS1
611	7397	8195	8217	KIF16B
612	7398	8196	8218	PEX7
613	7399	8197	8219	ALLC
614	7400	8198	8220	RGS12
615	7401	8199	8221	RBBP6
616	7402	8200	8222	PSMD11
617	7403	8201	8223	SLC1A7
618	7404	8202	8224	HYDIN
619	7405	8203	8225	FAM134C
620	7406	8204	8226	ARFIP2
621	7407	8205	8227	S100A5
622	7408	8206	8228	EXD3
623	7409	8207	8229	DNAH2
624	7410	8208	8230	VPS13C
625	7411	8209	8231	GOLPH3L
626	7412	8210	8232	LPCAT4
627	7413	8211	8233	PDPR
628	7414	8212	8234	ZNF8
629	7415	8213	8235	ZNF14
630	7416	8214	8236	FBXO21
631	7417	8215	8237	TTC3
632	7418	8216	8238	DENND1B
633	7419	8217	8239	RNF103
634	7420	8218	8240	ZNF202
635	7421	8219	8241	CDKL1
636	7422	8220	8242	SYNJ2
637	7423	8221	8243	REPS2
638	7424	8222	8244	COPS3
639	7425	8223	8245	RPAP1
640	7426	8224	8246	AUTS2
641	7427	8225	8247	PPAP2C
642	7428	8226	8248	ATG13
643	7429	8227	8249	DCAF10
644	7430	8228	8250	CLMN
645	7431	8229	8251	TMC5
646	7432	8230	8252	PRR5-ARHGAP8
647	7433	8231	8253	EFHD1
648	7434	8232	8254	TOB2
649	7435	8233	8255	ADAMTS8
650	7436	8234	8256	CACFD1
651	7437	8235	8257	SPON2
652	7438	8236	8258	IFITM3
653	7439	8237	8259	SLC44A4
654	7440	8238	8260	EIF1B
655	7441	8239	8261	KATNB1
656	7442	8240	8262	CCNB1IP1
657	7443	8241	8263	KIAA1324
658	7444	8242	8264	NEK9
659	7445	8243	8265	MEAF6
660	7446	8244	8266	PADI1
661	7447	8245	8267	CLSTN2
662	7448	8246	8268	ADCK2

## Sheet: AML Citation Ranking Graph
#	BC Gene Citation Ranking	AML Gene Citation Ranking	DLCL Gene Citation Ranking	Gene Name
1	46	1	36	CD34
2	1196	4	470	FLT3
3	927	5	135	RUNX1
4	797	10	158	MLL
5	798	14	174	CD33
6	743	18	178	MPO
7	332	27	222	KIT
8	3567	28	203	SPI1
9	983	31	530	CEBPA
10	30	41	52	JUN
11	600	51	78	FUT4
12	379	52	165	MYB
13	1319	53	21	BCR
14	344	57	1958	RUNX2
15	2793	65	829	CSF3R
16	1575	69	2035	HOXA9
17	3568	73	2144	MKL1
18	6836	81	4005	NFE2
19	249	85	51	MCL1
20	202	87	565	ABCC1
21	1691	93	991	FLI1
22	1486	95	234	ETV6
23	91	104	65	CASP9
24	114	111	112	IL8
25	40	114	80	PIK3CB
26	2646	123	1471	GATA2
27	102	135	115	MAPK14
28	130	144	325	KRAS
29	449	146	644	NCOR1
30	9269	167	1699	MLLT10
31	3334	172	879	SP100
32	5732	177	7058	KAT6A
33	1910	184	2063	HOXA10
34	1154	203	54	SPN
35	911	215	240	CBL
36	1972	226	197	FECH
37	243	275	396	SOD1
38	1414	280	3085	CCNA1
39	617	282	1147	ABCC3
40	1133	283	1998	CBFA2T3
41	234	290	1127	RARB
42	248	291	284	JUND
43	280	294	566	PTGER3
44	330	299	462	FGFR1
45	563	319	200	IFNB1
46	542	328	901	TOP1
47	4169	332	2177	CSF2RA
48	6839	333	758	PICALM
49	296	334	193	CDK6
50	485	346	1963	NCOA2
51	502	359	1260	ETS2
52	786	371	680	YY1
53	609	385	466	MBP
54	1177	386	3052	NUMA1
55	566	411	252	CFLAR
56	5735	417	2220	HOXA7
57	698	422	972	HSF1
58	2963	427	243	LMO2
59	1847	439	2058	ERG
60	558	444	1261	FES
61	1911	449	753	EWSR1
62	238	471	1251	TFAP2A
63	1646	479	4860	WISP1
64	499	487	1731	TEK
65	928	490	485	CASP2
66	834	497	373	IL18
67	1384	501	862	CD47
68	457	513	742	KLF4
69	9272	526	836	BCRP2
70	1101	534	749	PLCG1
71	547	544	332	PTK2B
72	4174	551	1014	ZMYM2
73	713	584	679	HES1
74	1228	589	4752	CUX1
75	1612	591	2043	LAMP2
76	1613	610	4848	CA2
77	1694	612	1184	CDK9
78	3337	616	2547	CBS
79	4176	617	2618	SRGN
80	553	620	231	IKBKB
81	864	624	2329	ANGPT1
82	2047	628	1604	CTSA
83	714	648	327	BAD
84	813	650	2325	SATB1
85	1057	668	857	SMPD1
86	2658	673	2497	HNRPDL
87	2964	674	3364	PTPRA
88	3880	675	5876	FER
89	1578	691	925	TOP2B
90	1974	695	2441	FOXO4
91	5747	699	2224	AFF1
92	9278	701	9892	UBA7
93	929	711	1055	PCBP2
94	1321	716	1294	SRF
95	567	733	903	NOS1
96	2332	741	791	RALGDS
97	5749	750	3830	CALCOCO2
98	930	760	3015	MBD2
99	949	763	3017	HOXA5
100	3574	776	5713	KAT6B
101	5071	778	2693	TPMT
102	621	791	905	HDAC6
103	875	794	650	PLEK
104	1491	800	1069	HFE
105	509	813	4643	CTNNA1
106	2967	829	5391	RNASE2
107	4179	831	405	RPL22
108	9281	837	9895	NT5C2
109	1301	852	1173	ARID4A
110	307	871	505	AKT2
111	662	879	971	CASP6
112	988	883	1418	PRKAR2A
113	2800	898	3326	PURA
114	3147	900	2536	EPS15
115	3576	902	5714	TBXAS1
116	3884	904	3516	MZF1
117	849	925	4686	PLD2
118	4180	948	3570	HOXB3
119	1073	981	1284	SMARCA2
120	1085	982	984	GAB1
121	1141	983	2353	USF2
122	1418	989	922	ELF1
123	2225	997	5066	HHEX
124	836	1036	1274	MGEA5
125	1058	1044	1057	COX6B1
126	1157	1045	1165	MAP2K3
127	1158	1046	4737	PDGFA
128	1650	1054	77	FCGR2B
129	1700	1055	4871	TRIM24
130	3579	1071	3470	SF3B1
131	3890	1073	3517	TRAPPC4
132	4185	1076	2178	KDM6A
133	899	1097	1412	ICOSLG
134	1452	1109	1781	HNRNPA1
135	1978	1118	4964	RPS14
136	3150	1130	3398	SMC3
137	9296	1146	9902	PBX3
138	1420	1161	2379	HNRNPK
139	3894	1191	5879	DYRK1A
140	745	1223	1050	PGF
141	790	1224	780	SMO
142	1210	1230	717	PIK3R1
143	1363	1235	4778	TNK2
144	9303	1275	1371	LYL1
145	612	1292	1263	TSC2
146	939	1297	681	DICER1
147	1329	1307	4770	DUSP6
148	1541	1312	2032	FOSB
149	1762	1319	2419	ZYX
150	3155	1341	3400	PRDX4
151	3586	1345	2147	HNRNPU
152	3587	1346	2148	USP7
153	3897	1350	1210	F12
154	4606	1353	6286	GNAQ
155	5766	1361	7071	GAS7
156	6870	1365	7875	HLX
157	9312	1373	9911	C19ORF6
158	769	1400	1271	TSHB
159	800	1402	649	SMAD1
160	1004	1411	3022	KHDRBS1
161	1041	1414	1281	CTBP1
162	1182	1421	1999	SOX4
163	1331	1424	2014	ITGA9
164	1764	1431	3148	ATRX
165	2342	1445	5108	PGD
166	3899	1459	2599	ZNF44
167	4610	1471	2664	RALBP1
168	5770	1476	7072	IL5RA
169	6878	1481	1693	PKNOX1
170	991	1517	1278	BUB1
171	1023	1519	2342	SRY
172	1024	1520	3025	VASP
173	1544	1539	1784	KIDINS220
174	2239	1555	788	DHDDS
175	2240	1556	1457	MAP2K7
176	2815	1562	5315	SMARCC1
177	3157	1575	2537	IL22
178	3357	1576	3434	MT1G
179	3358	1577	5594	SLC39A1
180	3901	1587	1211	CABIN1
181	4204	1590	2627	NR6A1
182	4205	1591	1881	TLE4
183	5775	1607	7074	GTF2F1
184	5776	1608	7075	TPSAB1
185	6889	1613	1115	SRRM1
186	9330	1628	4253	N4BP1
187	9331	1629	9921	TRIM39-RPP21
188	837	1667	3005	MCAM
189	943	1669	1157	CXCL2
190	1123	1671	630	NOTCH2
191	1164	1673	3047	PLD1
192	1390	1683	2019	PTGER2
193	1586	1691	3114	UBTF
194	2242	1714	1087	PEG10
195	2672	1728	5248	KRT10
196	2980	1731	1636	PVR
197	2981	1732	3366	PARK7
198	3599	1745	1339	CCL23
199	4211	1755	2628	ACIN1
200	5102	1761	2696	PCM1
201	5781	1767	2225	MAN2C1
202	5782	1768	2740	MEF2A
203	9346	1783	9928	SAP130
204	632	1815	2310	IGF2R
205	725	1817	907	PPIA
206	780	1818	2323	NR1H2
207	803	1819	624	MDM4
208	830	1820	2327	NCSTN
209	868	1821	2330	ARHGDIA
210	1240	1834	1574	MNT
211	1336	1839	2368	EHMT2
212	1457	1843	2024	EEF2
213	1458	1844	3091	MAP3K11
214	1623	1855	1179	RBX1
215	1712	1856	1077	MAPKAPK2
216	1812	1863	1188	SFPQ
217	2136	1873	929	LGALS9
218	2674	1888	5249	CENPJ
219	2984	1902	3368	CCNT1
220	2985	1903	3369	ACTR2
221	2986	1904	3370	FLOT1
222	3366	1910	2551	PAX3
223	3606	1916	5721	RNH1
224	4215	1922	1349	NIPBL
225	4216	1923	6059	RCHY1
226	4620	1931	3659	APTX
227	5787	1946	7082	NUCB2
228	9360	1963	9938	H3F3B
229	9361	1964	9939	APBB1IP
230	890	2000	3009	PKM
231	1185	2005	3053	GNAS
232	1394	2011	2378	PLAGL1
233	1461	2016	1582	TAF1
234	1550	2020	924	PRDM2
235	1716	2032	1185	FRK
236	2057	2046	1605	DDX3X
237	2557	2062	1195	HAX1
238	3168	2087	5488	PPP1R12A
239	3909	2105	5881	CHD4
240	4625	2121	6293	EIF4A1
241	5118	2132	6608	CREB3
242	5794	2149	3838	SPEN
243	5795	2150	3839	TPSG1
244	6924	2160	4024	ATXN3
245	9374	2175	4257	GNA15
246	9375	2176	4258	KDM2A
247	9376	2177	9950	CHMP5
248	9377	2178	9951	SARS2
249	9378	2179	9952	SPR
250	578	2224	547	MSH6
251	1338	2263	2369	LRRC16A
252	1508	2276	1178	RHEB
253	1553	2277	2396	THRB
254	1719	2281	1590	TACSTD2
255	1818	2290	2056	EIF3A
256	1862	2294	786	TBL1X
257	2059	2310	2450	NLRP3
258	2250	2316	826	ATF6
259	2358	2321	3244	SCN10A
260	2359	2322	5110	PTP4A2
261	2448	2328	3256	SUCLG1
262	2565	2336	1467	ID3
263	2690	2342	1632	M6PR
264	2691	2343	2500	NTF3
265	2692	2344	3304	HADHA
266	3377	2374	5598	DDX39B
267	4232	2398	1882	ITPR3
268	4233	2399	6065	SERPINB1
269	4636	2417	2666	ZFP36L2
270	5135	2428	1675	ITPR2
271	5136	2429	6617	EIF4G2
272	5805	2441	2741	KLHL24
273	5806	2442	3840	DDX41
274	5807	2443	7092	RPA3
275	6939	2463	1921	FRAS1
276	6940	2464	2794	TLX3
277	6941	2465	4026	RNF7
278	6942	2466	7913	TADA2A
279	6943	2467	7914	RAB9A
280	9399	2499	4262	EIF2B3
281	9400	2500	9966	ATF7IP
282	677	2538	4661	GRN
283	1106	2564	4723	NRL
284	1280	2576	2010	FOSL2
285	1309	2581	3073	NAPA
286	1870	2608	4923	BRE
287	2000	2618	2446	BTRC
288	2365	2645	827	LARS
289	2366	2646	3245	RNF19A
290	2571	2660	1840	GSTO1
291	2700	2668	3305	STAB1
292	2841	2678	2112	MAML1
293	2842	2679	5325	KDM5A
294	3001	2691	3371	CAT
295	3177	2706	1642	IL1RL1
296	3631	2725	5734	ELF2
297	4251	2751	6071	HLCS
298	4252	2752	6072	TGOLN2
299	4647	2767	3660	PHACTR1
300	4648	2768	3661	RPS3A
301	4649	2769	6308	GTF2H3
302	5148	2801	3749	DGUOK
303	5149	2802	3750	TCEB2
304	5827	2832	7105	LLGL1
305	5828	2833	7106	SF1
306	5829	2834	7107	RASGRP2
307	5830	2835	7108	PRPF8
308	6975	2867	7936	CPA3
309	6976	2868	7937	HOXD9
310	6977	2869	7938	ST7L
311	9430	2911	2261	CIAO1
312	9431	2912	4267	MANBA
313	9432	2913	9988	ZBTB24
314	9433	2914	9989	TDRKH
315	856	2988	4687	RB1CC1
316	1312	3017	1066	EEA1
317	1400	3026	553	CDR2
318	1466	3033	3093	DEC1
319	1627	3045	2404	CFD
320	1671	3050	2408	CAPN1
321	1730	3053	2051	RRAS2
322	1773	3057	1796	PDPK1
323	2068	3078	1817	OGT
324	2155	3087	999	NINL
325	2463	3118	2483	MAU2
326	2579	3128	2491	EFNA5
327	2854	3149	1848	PDX1
328	3185	3174	1644	PTPN12
329	3186	3175	2124	REEP5
330	3392	3195	1651	SOS2
331	3393	3196	2136	NR4A2
332	3644	3219	517	GUK1
333	3645	3220	2156	PIKFYVE
334	3646	3221	3479	LAMB3
335	3647	3222	5739	TOPORS
336	3939	3244	3533	AZU1
337	3940	3245	3534	GLIPR1
338	3941	3246	5891	PSTPIP2
339	4267	3269	2637	MTM1
340	4268	3270	3586	TLN1
341	4269	3271	6081	HNRNPA3
342	4681	3297	1508	JARID2
343	4682	3298	3669	ANK3
344	4683	3299	6323	ATG16L1
345	5179	3328	3756	RNF2
346	5180	3329	3757	CRADD
347	5181	3330	6639	PELO
348	5182	3331	6640	DUSP10
349	5862	3366	2227	FIS1
350	5863	3367	7128	KDM3B
351	7019	3422	2802	SRRM2
352	7020	3423	4040	FKBP8
353	7021	3424	7956	TBC1D3
354	7022	3425	7957	SMC5
355	7023	3426	7958	MBOAT7
356	7024	3427	7959	TSPAN32
357	9476	3510	1032	CARD9
358	9477	3511	4269	LYST
359	9478	3512	4270	RHOT2
360	9479	3513	10024	EIF5
361	9480	3514	10025	COA1
362	9481	3515	10026	RNF17
363	9482	3516	10027	ANKRD28
364	9483	3517	10028	SLC25A28
365	9484	3518	10029	IPPK
366	571	3661	1735	ZEB2
367	678	3665	1405	SAFB
368	947	3688	1991	XRCC2
369	958	3689	4694	ARRB1
370	1046	3697	4712	IQGAP1
371	1064	3700	2348	CD164
372	1287	3720	4761	NCOA4
373	1373	3727	2374	PAK2
374	1469	3738	1441	GNB2L1
375	1557	3748	1584	OPRM1
376	1777	3773	2053	PPARD
377	1778	3774	3150	TXNRD2
378	1779	3775	4895	PER1
379	2168	3828	5039	MAP2K5
380	2169	3829	2462	ATP7A
381	2170	3830	2463	DIAPH1
382	2271	3846	930	MAZ
383	2383	3862	5120	PBRM1
384	2473	3874	3260	COX4I1
385	2474	3875	3261	CSN3
386	2475	3876	3262	PLGRKT
387	2591	3899	2492	NFATC4
388	2592	3900	5219	ILF3
389	2593	3901	5220	MT1F
390	2719	3915	2505	POLG
391	2867	3936	937	SH3BGRL3
392	2868	3937	1093	ROR1
393	2869	3938	1477	HIP1
394	2870	3939	3341	FKBP15
395	3028	3963	2533	ITSN2
396	3029	3964	3377	PSEN1
397	3206	3987	1096	TNFSF12
398	3207	3988	1097	NAA15
399	3208	3989	2539	SCAF11
400	3209	3990	5504	CBR3
401	3210	3991	5505	SART1
402	3211	3992	5506	H2AFY
403	3416	4028	2139	SRSF5
404	3417	4029	2559	COPA
405	3418	4030	3446	GTF2I
406	3419	4031	3447	ARHGEF5
407	3420	4032	5610	LHX3
408	3421	4033	5611	MAP4K5
409	3669	4068	2578	PATZ1
410	3670	4069	5746	GGA3
411	3671	4070	1100	NFATC3
412	3672	4071	1655	ANP32A
413	3673	4072	2579	GAD2
414	3674	4073	3483	HNRNPH1
415	3675	4074	3484	RBM5
416	3676	4075	5747	PPP2R1B
417	3964	4122	5902	EIF4B
418	3965	4123	5903	NAP1L1
419	3966	4124	5904	SRSF6
420	4295	4160	2640	COL14A1
421	4296	4161	2641	MAPK13
422	4297	4162	6095	CETN1
423	4298	4163	6096	POLR3B
424	4299	4164	6097	RBM10
425	4712	4234	6338	SCLY
426	4713	4235	3674	ARG2
427	4714	4236	3675	THOC2
428	4715	4237	3676	SRSF7
429	4716	4238	3677	SPTLC2
430	4717	4239	6339	ANXA11
431	4718	4240	6340	POLR2F
432	4719	4241	6341	ELMO1
433	5217	4319	6656	XPNPEP1
434	5218	4320	3767	NPC1
435	5219	4321	6657	MAGEB4
436	5220	4322	6658	TRIM32
437	5221	4323	6659	DIAPH3
438	5918	4431	7160	ZNF148
439	5919	4432	886	GML
440	5920	4433	1685	HOXC5
441	5921	4434	3860	TPP1
442	5922	4435	3861	TFEC
443	5923	4436	3862	UBE2E1
444	5924	4437	7161	CD97
445	5925	4438	7162	IDS
446	5926	4439	7163	PI4K2A
447	5927	4440	7164	PSMD10
448	5928	4441	7165	PSMA2
449	5929	4442	7166	ATP5L
450	5930	4443	7167	AGPAT2
451	7107	4585	1029	BCL9
452	7108	4586	2806	CREG1
453	7109	4587	4059	GNG11
454	7110	4588	4060	IL1RAP
455	7111	4589	4061	PKN2
456	7112	4590	4062	SRP72
457	7113	4591	4063	HIPK3
458	7114	4592	8012	EIF3L
459	7115	4593	8013	INPP5B
460	7116	4594	8014	NDUFAB1
461	7117	4595	8015	PTH2R
462	7118	4596	8016	PEX2
463	7119	4597	8017	TAF7L
464	7120	4598	8018	ZNF32
465	7121	4599	8019	P2RX2
466	7122	4600	8020	SYMPK
467	7123	4601	8021	ARID5B
468	7124	4602	8022	ZMYM4
469	7125	4603	8023	UBAP2L
470	7126	4604	8024	KIAA0100
471	7127	4605	8025	HNRNPUL2
472	7128	4606	8026	HEG1
473	9611	4832	2884	LAIR1
474	9612	4833	4284	ADD1
475	9613	4834	4285	BRD3
476	9614	4835	4286	SCARF1
477	9615	4836	4287	TP53I11
478	9616	4837	10126	ARL1
479	9617	4838	10127	MAP3K9
480	9618	4839	10128	NPR3
481	9619	4840	10129	P2RX1
482	9620	4841	10130	P2RX4
483	9621	4842	10131	INTS8
484	9622	4843	10132	RPS21
485	9623	4844	10133	TLL2
486	9624	4845	10134	TACR3
487	9625	4846	10135	ADNP2
488	9626	4847	10136	ZNF292
489	9627	4848	10137	KIAA0146
490	9628	4849	10138	PASK
491	9629	4850	10139	ADAM21
492	9630	4851	10140	ZMYM5
493	9631	4852	10141	ARIH1
494	9632	4853	10142	TM9SF4
495	9633	4854	10143	GNPTAB
496	9634	4855	10144	ZC3H11A
497	9635	4856	10145	PTBP3
498	9636	4857	10146	CHD1L
499	9637	4858	10147	TUBGCP2
500	9638	4859	10148	RPL35
501	9639	4860	10149	UBE4B
502	9640	4861	10150	ATXN2L
503	9641	4862	10151	WNK1
504	9642	4863	10152	RBM15B
505	9643	4864	10153	MYO18A

## Sheet: DLCL Citation Ranking Graph
#	BC Gene Citation Ranking	AML Gene Citation Ranking	DLCL Gene Citation Ranking	Gene Name
1	310	107	1	MS4A1
2	528	37	5	CD19
3	506	243	20	CD40
4	1845	253	26	CD79A
5	2961	251	29	CD22
6	169	206	34	IL10
7	2653	451	38	CR2
8	1201	392	44	PAX5
9	424	580	46	BIRC3
10	420	153	70	CD80
11	1756	771	102	CD27
12	83	137	116	PARP1
13	77	168	121	RB1
14	5228	4330	124	AICDA
15	2222	828	140	TCL1A
16	2992	2359	154	CXCR5
17	5796	2151	166	CD79B
18	853	2240	171	CXCL13
19	591	814	201	RELB
20	3905	1753	212	BLNK
21	188	273	221	GRB2
22	901	1227	246	SYK
23	1325	1159	275	NFATC1
24	32	164	301	MMP9
25	3382	2715	335	CD70
26	6982	2874	336	CD72
27	9379	2180	349	POU2AF1
28	5068	305	366	IRF8
29	5942	4455	367	ENTPD1
30	2328	468	379	TCF3
31	862	412	389	CXCL9
32	5754	955	416	BCL11A
33	259	381	421	TERT
34	6860	1200	448	BACH2
35	381	235	507	ETS1
36	1926	1705	512	CCL19
37	6925	2161	538	SPIB
38	6118	7434	585	IL21R
39	6946	2470	586	PLCG2
40	327	579	642	UBC
41	3367	1911	793	HLA-DQA1
42	2456	2653	828	UBE2N
43	2802	1006	873	LTBR
44	2816	1563	875	HLA-DQB1
45	5361	7018	884	KCND1
46	6121	7437	887	RFX5
47	1263	715	918	GALNS
48	10078	10078	957	VPREB3
49	1019	849	982	APP
50	1617	993	1073	SMARCB1
51	2291	5652	1088	CSNK1A1
52	5871	3375	1110	RASGRP3
53	7458	8256	1118	IGHM
54	4235	2401	1215	IKZF3
55	4310	4175	1218	TCL1B
56	10084	10084	1241	RGS13
57	270	663	1252	ITGA6
58	619	565	1264	HLA-DMA
59	1455	1535	1299	WEE1
60	2608	5753	1324	BIK
61	3907	1920	1344	CD1C
62	4311	4176	1350	HRK
63	4822	6742	1358	BATF
64	9653	4874	1377	LRMP
65	9654	4875	1378	TFEB
66	2368	2648	1461	TMPO
67	9661	4882	1536	SH2B2
68	1558	3749	1585	NQO2
69	6132	7448	1689	SWAP70
70	7354	8152	1697	BLK
71	2064	2623	1816	UBE2D2
72	2988	2083	1851	PIAS2
73	960	3691	1992	ENPP2
74	1361	1050	2016	FKBP1A
75	2090	5592	2074	CXCR6
76	2244	1716	2084	CCL18
77	7472	8270	2252	SIT1
78	912	337	2334	RXRA
79	1079	5367	2349	MMP12
80	1824	2605	2423	E2F5
81	1837	5522	2425	RNF11
82	1866	2298	2427	CTNNBIP1
83	2179	3839	2465	NR1H3
84	4735	4257	2678	MLL4
85	4842	6762	2688	TRIO
86	5071	778	2693	TPMT
87	5125	2139	2703	UBD
88	5159	2812	2708	TFE3
89	7157	4635	2812	HLA-DMB
90	7478	8276	2829	GRIK2
91	10150	10150	2907	SLC15A3
92	10197	10197	2954	ADAMDEC1
93	1029	3001	3026	HTR3A
94	1187	2254	3054	LRPAP1
95	1188	2255	3055	TCF7L2
96	1532	491	3108	NF1
97	2396	5684	3250	CTBP2
98	3264	6007	3422	CTSH
99	3638	2732	3477	MCM5
100	3702	4101	3494	DCAF7
101	4282	3284	3591	ME3
102	4695	3311	3670	CNR2
103	4748	4270	3690	NPL
104	5973	4486	3877	SERPINB6
105	6179	7495	3924	HLA-DOA
106	7040	3443	4042	CETP
107	7042	3445	4044	AFF3
108	7111	4589	4061	PKN2
109	7601	8399	4194	OSBPL2
110	7608	8406	4201	SH3BP5
111	7632	8430	4225	SGPP1
112	9722	4943	4324	GRHPR
113	10218	10218	4345	CYB5R2
114	10380	10380	4507	TMEM243
115	10455	10455	4582	ZNF804A
